# Supplementary material
Source: Royal Society of Chemistry journal article supplement (doi:10.1039/d6cc00893c)
Supplement: d6cc00893c1.pdf [file d6cc00893c1.pdf]

## Supporting information

### Fe(0)-Catalyzed Alkyne Carboxylation with CO<sub>2</sub>

#### Involving Spin Crossover

Huili Wang, <sup>a,†</sup> Qiqi Zhang, <sup>b,†</sup> Haizhu Yu, <sup>b,\*</sup> Kane Jacob, <sup>c</sup> Azzedine Bousseksou, <sup>c,\*</sup> Philippe Hapiot, <sup>d</sup> Jean-Luc Pozzo, <sup>a,\*</sup> Didier Astruc <sup>a,\*</sup>

<sup>a</sup> Université de Bordeaux, ISM, UMR CNRS N° 5255, 33405 Talence Cedex, France.

<sup>b</sup> Department of Chemistry and Center for Atomic Engineering of Advanced Materials, Anhui Province Key Laboratory of Chemistry for Inorganic/Organic Hybrid Functionalized Materials, Anhui University, Hefei, Anhui, 230601 People's Republic of China.

<sup>c</sup> Université de Toulouse, LCC, UPR CNRS N° 8241, 31077 Toulouse Cedex, France

<sup>d</sup> Univ. Rennes CNRS, ISCR (Institut des Sciences Chimiques de Rennes), UMR 6226, F-35000 Rennes, France

<sup>†</sup> Both authors (HW and QZ) contributed equally to this work.

#### Table of Contents

|                                                                                                              |         |
|--------------------------------------------------------------------------------------------------------------|---------|
| General data.                                                                                                | S1      |
| Synthesis of 2,9-Diaryl-1,10-phenanthroline.                                                                 | S1      |
| Synthesis of Darphen-Fe.                                                                                     | S1      |
| Preparation of the reductant EtMgBr.                                                                         | S2      |
| Catalysis of the carboxylation reaction of terminal alkynes with CO <sub>2</sub> .                           | S2-S3   |
| Figure S1. The UV-vis spectra of 4 precursors.                                                               | S4      |
| Figure S2. Cyclic voltammogram (cathodic waves) of Fe(II)(TIPP)Cl <sub>2</sub>                               | S5      |
| Details of the DFT calculations.                                                                             | S5      |
| Table S1. Spin distribution of the key structures involved in the most feasible catalytic pathway.           | S6      |
| Table S2. Gibbs Free Energies and Electronic Energies in Solvent of related compounds and Transition States. | S6-S7   |
| Cartesian Coordinates of Intermediates and Transition States.                                                | S7-S71  |
| <sup>1</sup> H NMR and <sup>13</sup> C NMR data for the various targeted products.                           | S71-S83 |
| References                                                                                                   | S83     |

## Experimental Section

### General Data

2,9-dichloro-1,10-phenanthroline, Pd(dppf)Cl<sub>2</sub>, Ba(OH)<sub>2</sub>·8H<sub>2</sub>O, ArB(OH)<sub>2</sub>, terminal alkynes and FeCl<sub>2</sub> were purchased from BLD Pharm. All commercial chemicals were used without further purification.

<sup>1</sup>H NMR spectra were recorded at 25 °C using a Bruker AC 300 MHz instrument. All chemical shifts are reported in parts per million (δ, ppm) and calibrated using residual protons in deuterated solvents (CDCl<sub>3</sub> at 7.26 ppm for <sup>1</sup>H NMR and 77.16 ppm for <sup>13</sup>C NMR; CD<sub>3</sub>OD at 3.31 ppm for <sup>1</sup>H NMR and 49.00 ppm for <sup>13</sup>C NMR).

The UV-Vis absorption spectra were recorded using Agilent CARY 5000 Spectrophotometer spectrophotometer. The samples were dissolved in dichloromethane and placed in a standard quartz cuvette with a 1 cm path length. Baseline correction was performed using the pure solvent prior to measurement. The spectra were acquired in the range of 200 to 800 nm at a scanning speed of 200 nm/min. All measurements were conducted at room temperature.

### Synthesis of 2,9-diaryl-1,10-phenanthroline

The preparation of the 2,9-diaryl-1,10-phenanthroline followed the procedure described in reference.<sup>1</sup> In brief, 2,9-dichloro-1,10-phenanthroline (747 mg, 3 mmol), Pd(dppf)Cl<sub>2</sub> (329 mg, 0.45 mmol), Ba(OH)<sub>2</sub>·8H<sub>2</sub>O (4.74 g, 15 mmol), and ArB(OH)<sub>2</sub> (9 mmol) were suspended in a mixture of toluene (100 mL) and water (5 mL) and degassed by nitrogen purging. The mixture was heated to 110 °C, and the reaction progress was monitored by thin-layer chromatography (TLC). After cooling to room temperature, the mixture was neutralized with a saturated aqueous solution of ammonium chloride (50 mL) and extracted with dichloromethane (100 mL×3). The organic layers were combined, dried over anhydrous MgSO<sub>4</sub>, and concentrated under reduced pressure. The residue was purified by silica gel column chromatography and recrystallized in hexane/CH<sub>2</sub>Cl<sub>2</sub> [20:1(v/v)] to give 2,9-diaryl-1,10-phenanthroline.

### Synthesis of Darphen-Fe

The preparation of the Darphen-Fe followed the procedure described in reference.<sup>1</sup>

2,9-Diaryl-1,10-phenanthroline (2 mmol) and FeCl<sub>2</sub> (253.5 mg, 2 mmol) were added into a 50-mL Schlenk flask. The flask was evacuated and connected to argon gas. This process was repeated twice. Dry THF (20 mL) was added to the flask. The reaction mixture was stirred at room temperature for 24 hours. The solvent was partially removed under vacuum (approximately 5 mL remained), and then dry *n*-hexane (15 mL) was added, causing a solid to precipitate. The product was collected by filtration, washed with 20 mL of *n*-hexane, and dried under vacuum. This protocol yields the precursors—iPrPhenFeCl<sub>2</sub>, MePhenFeCl<sub>2</sub>, PhenylPhenFeCl<sub>2</sub> and Cl<sub>2</sub>PhenFeCl<sub>2</sub>. While the complexes were fully characterized in the literature (e.g., by IR, EPR analysis, Mössbauer spectra, Magnetic measurement, XPS, Single crystal structures and NMR spectroscopy),<sup>1-8</sup> the precursors were characterized in this work primarily by <sup>1</sup>H NMR spectroscopy and UV-vis spectra.

#### **Preparation of the reductant EtMgBr**

The magnesium chips were lightly rinsed with dilute hydrochloric acid to remove the surface oxide layer, then quickly washed with water followed by ethanol, and dried thoroughly. The treated magnesium chips were transferred to a dry reaction flask, which was subsequently purged with an inert gas to eliminate air and moisture. A small amount of absolutely anhydrous ether was added—just enough to submerge the magnesium chips. Ethyl bromide was then added dropwise to the flask. The reaction mixture became turbid and exhibited gentle boiling (ether reflux). The system was cooled in a cold-water bath to control the reaction temperature. After the addition of ethyl bromide was complete, the magnesium chips had almost completely reacted and disappeared, yielding a gray ethylmagnesium bromide (EtMgBr) solution in ether.

#### **Catalysis of the carboxylation reaction of terminal alkynes with CO<sub>2</sub>**

A terminal alkyne (1.0 mmol) and Cs<sub>2</sub>CO<sub>3</sub> (1.5 mmol) were placed in a 10 mL Schlenk tube **1**. The tube was evacuated and then refilled with CO<sub>2</sub> (99.9%) using a balloon. This process was repeated twice. Another Schlenk tube **2**, containing the ArPhenFeCl<sub>2</sub> catalyst precursor, was evacuated and connected to argon. This process was repeated twice. Then, 1 mL of DMF was injected into tube **2**. Tube **2** was stirred at

room temperature (25-35°C) for 1 minute, after which EtMgBr (0.044 mmol) was added, resulting in a black solution. The black solution was transferred to tube **1** and reacted at room temperature with magnetic stirring (1400 rpm) for 8 h. After removing the CO<sub>2</sub> balloon, deionized water (15 mL) was added to the reaction mixture and stirred for 30 minutes. The solid catalyst was separated from the reaction mixture by centrifugation (8000 rpm, 5 minutes). The resulting liquid phase was washed with dichloromethane (3 × 10 mL) in a 125 mL separatory funnel, and the aqueous phase was retained. The aqueous phase was then acidified to pH = 1 with concentrated aqueous HCl at 0 °C. The product-containing solution was then extracted with ethyl acetate. The aqueous phase was monitored by TLC during the extraction process until the product was free. The organic phase was collected, dried over anhydrous sodium sulfate, and filtered. The solvent was then removed by rotary evaporation to yield propiolic acid. The final product was analyzed by <sup>1</sup>H NMR. In recovery experiments, the catalyst was isolated by centrifugation and washed twice with DMF and twice with methanol. The catalyst was then dried at 60 °C overnight before use.

The electronic structures of a series of 2,9-substituted 1,10-phenanthroline iron(II) dichloride complexes (iPrPhenFeCl<sub>2</sub>, MePhenFeCl<sub>2</sub>, PhenylPhenFeCl<sub>2</sub>, and Cl<sub>2</sub>PhenFeCl<sub>2</sub>) were characterized *inter alia* using UV-vis absorption spectroscopy, as shown in Figure S1. All measurements were conducted in spectroscopic-grade solvents (e.g., dichloromethane) at concentrations ranging from 1\*10<sup>-5</sup> to 1\*10<sup>-4</sup> mol/L to ensure absorbance values remained within the optimal linear range according to the Beer-Lambert law.

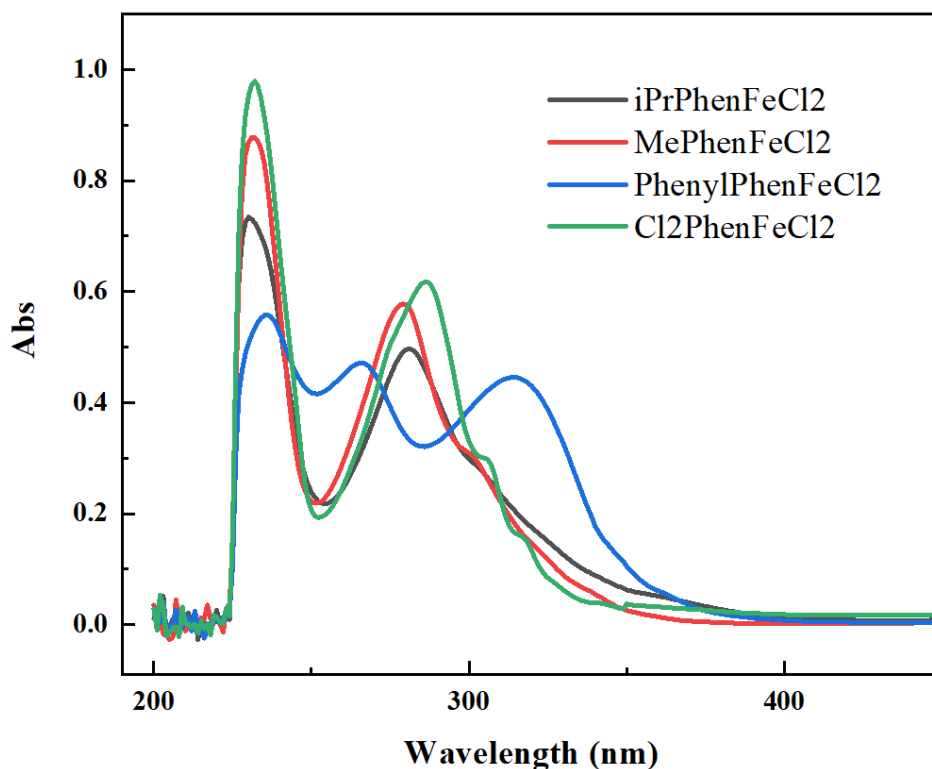

**Figure S1.** The UV-vis spectra of 4 precursors.

The experimental spectra reveal three primary characteristic absorption regions between 200 and 450 nm. The first is the ligand-internal  $\pi \rightarrow \pi^*$  transition (200–250 nm).<sup>9, 10</sup> Notably,  $\text{Cl}_2\text{PhenFeCl}_2$  displays the highest molar absorptivity, which is attributed to the strong inductive effect of the chloro-substituents on the phenanthroline backbone, thereby enhancing the intensity of the  $n \rightarrow \pi^*$  transitions. In this region, the impact of substituents on the energy levels is most pronounced. Following this are conjugation extension and steric hindrance effects (250–350 nm).  $\text{PhenylPhenFeCl}_2$  shows a significant red-shift, with a prominent absorption peak at 315 nm. This is due to the effective  $\pi$ -conjugation extension between the 2,9-phenyl rings and the phenanthroline core, which reduces the electronic transition energy gap. On contrast,  $i\text{PrPhenFeCl}_2$ , containing bulky 2,4,6-triisopropylphenyl (Tipp) groups, exhibits a much smaller red-shift. The sheer bulk of the Tipp groups induces a large dihedral angle (twisted conformation) between the aryl substituents and the phenanthroline plane, thereby limiting effective  $\pi$ -delocalization. Finally, metal-ligand charge transfer (MLCT) (350–450 nm) was observed.<sup>11, 12</sup> Broad, low-intensity absorption bands are

observed at the edge of the visible region. PhenylPhenFeCl<sub>2</sub> exhibits the most defined MLCT absorption, suggesting a superior energetic match between the iron (II) d-orbitals and the ligand  $\pi^*$  orbitals in this less sterically hindered system.

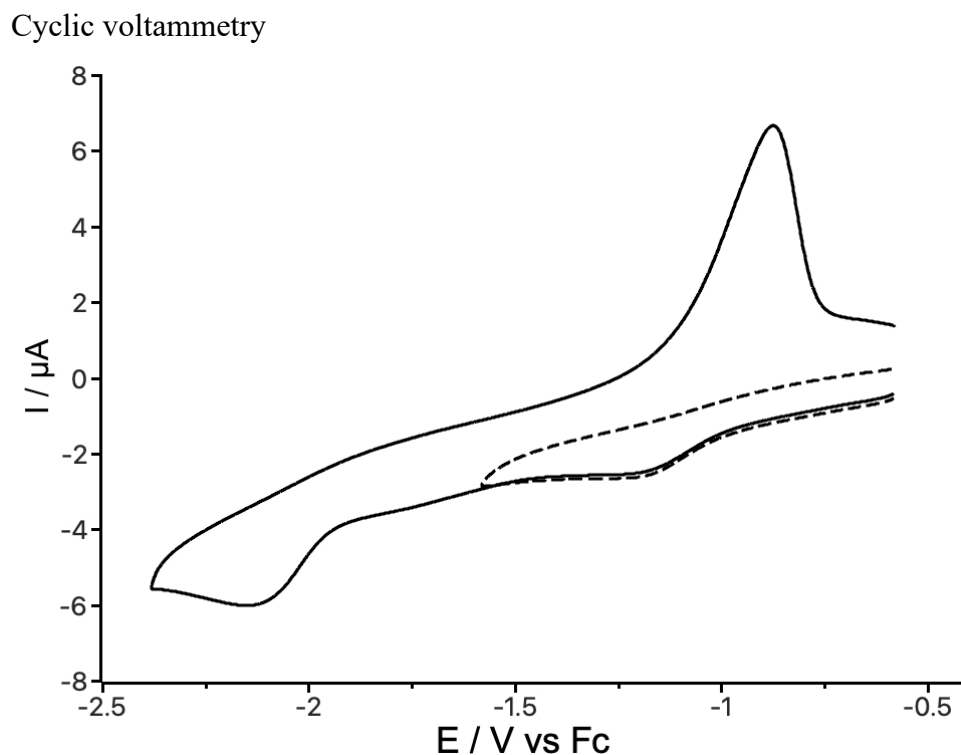

**Figure S2.** Cyclic voltammogram (cathodic waves) of Fe(II)(TIPP)Cl<sub>2</sub>

Cyclic voltammogram recorded at a scan rate of 0.2 V/sec with a Vionic-Methrom potentiostat of a 20% Et<sub>2</sub>O/80% DMF solvent mixture with the background electrolyte *n*-Bu<sub>4</sub>NPF<sub>6</sub> (0.1 mol L<sup>-1</sup>) on a 1 mm-diameter disk gold electrode of a solution (1.1 mg/5mL) of the complex Fe(II)(TIPP)Cl<sub>2</sub>, showing the two successive irreversible cathodic waves at -1.2 V and -2.1 V vs. ferricenium/ferrocene corresponding to the expected successive reductions of the first and second Cl-ligands of the complex Fe(II)(TIPP)Cl<sub>2</sub>.

## Details of the DFT calculations

All calculations were carried out with the Gaussian 09 package at the density-functional-theory (DFT) level. Minimum-energy crossing points (MECPs) were located with the sobMECP code modified by Lu, which is derived from the original program developed by Harvey and co-workers. Geometry optimizations and frequency analyses employed the  $\omega$ B97XD functional (restricted or unrestricted) together with a mixed basis set: def2-TZVP for Fe and 6-31G\* for H, C, N, and Si. Single-point energies were computed with the same functional but with the larger def2-TZVPP basis set. Both optimization and single-point energy calculation steps included the CPCM solvation model with THF as solvent (corresponding to the reaction conditions), and the solute cavity was defined by the UAHF protocol.

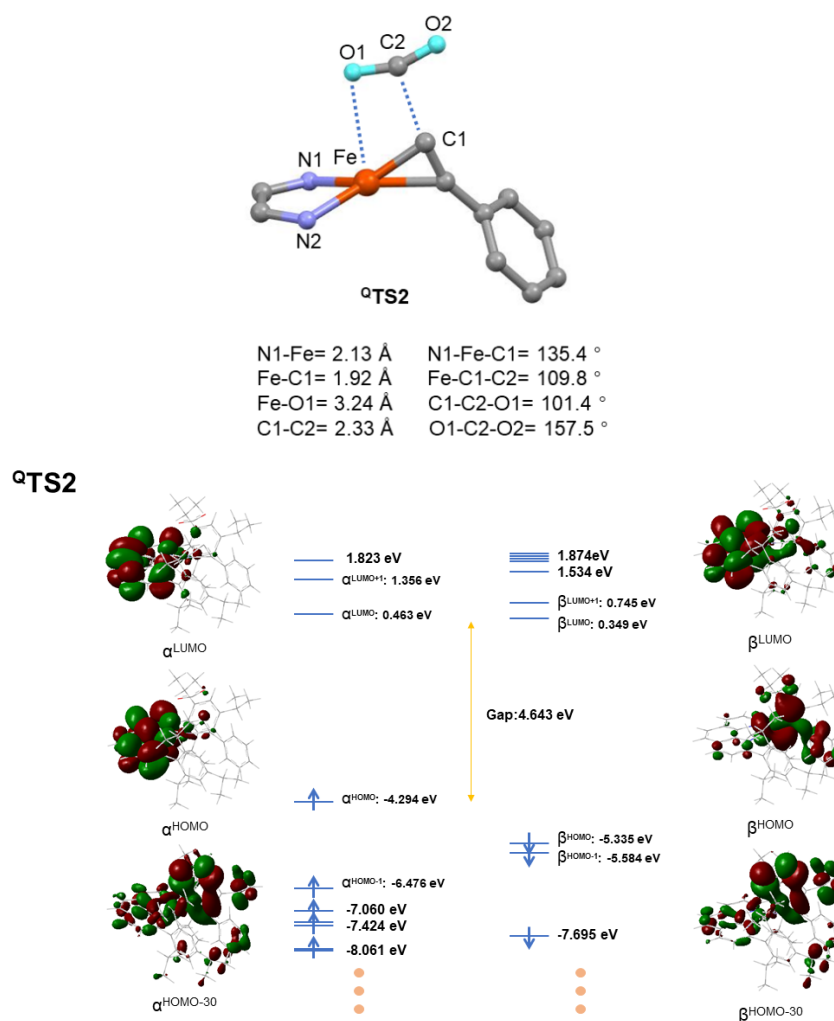

**Figure S3.** Optimized structure and the frontier orbitals of TS2.

According to the optimized structure of TS2, CO<sub>2</sub> is bent into a nonlinear structure

via the nucleophilic attack from the catalyst (with the O-C-O bond angle to be 157.5°), which is inherently initiated by the electron-rich Fe(0) center. The highest occupied molecular orbital mainly shows the bonding interaction between the Fe(0) center and the phenanthroline ( $\alpha^{\text{HOMO}}$ ) and alkyne groups ( $\beta^{\text{HOMO}}$ ).

**Table S1. Spin distribution of the key structures involved in the most feasible catalytic pathway.**

| Structure        | Fe    | TIPP  | PhC≡C(H/CO <sub>2</sub> ) <sup>1</sup> | PhC≡C(H) <sup>2</sup> | CO <sub>3</sub> <sup>2-</sup> | CO <sub>2</sub> |
|------------------|-------|-------|----------------------------------------|-----------------------|-------------------------------|-----------------|
| <sup>T</sup> In1 | 2.353 | 0.047 | -0.202                                 | -0.198                | -                             | -               |
| <sup>Q</sup> In1 | 3.268 | 1.123 | -0.171                                 | -0.220                | -                             | -               |
| <sup>Q</sup> In2 | 3.221 | 1.044 | -0.265                                 | -                     | -                             | -               |
| <sup>Q</sup> In3 | 3.632 | 0.236 | 0.029                                  | -                     | 0.104                         | -               |
| <sup>Q</sup> In4 | 3.117 | 0.889 | -0.006                                 | -                     | -                             | -               |
| <sup>Q</sup> In5 | 3.216 | 1.064 | -0.280                                 | -                     | -                             | -               |
| <sup>Q</sup> TS1 | 3.642 | 0.227 | 0.042                                  | -                     | 0.089                         | -               |
| <sup>Q</sup> TS2 | 3.015 | 1.038 | -                                      | -                     | -                             | -0.053          |

The subscript of <sup>1</sup> and <sup>2</sup> denote the first and second phenylacetylene substrate.

**Table S2. Gibbs Free Energies and Electronic Energies in Solvent of related compounds and Transition States**

|                                               | Gibbs Free Energies in solvent<br>(Hartree) | Electronic Energy in<br>solvent (Hartree) |
|-----------------------------------------------|---------------------------------------------|-------------------------------------------|
| <sup>T</sup> Fe(iprphen)(DMF) <sub>2</sub> -1 | -3501.3781                                  | -3502.3461                                |
| <sup>Q</sup> Fe(iprphen)(DMF) <sub>2</sub> -1 | -3501.3764                                  | -3502.3443                                |
| <sup>S</sup> Fe(iprphen)(DMF) <sub>2</sub> -1 | -3501.3095                                  | -3502.2829                                |
| <sup>T</sup> Fe(iprphen)(DMF) <sub>2</sub> -2 | -3501.2789                                  | -3502.2496                                |
| <sup>Q</sup> Fe(iprphen)(DMF) <sub>2</sub> -2 | -3501.3060                                  | -3502.2779                                |
| <sup>S</sup> Fe(iprphen)(DMF) <sub>2</sub> -2 | -3501.3204                                  | -3502.2893                                |
| <sup>S</sup> In1                              | -3621.0790                                  | -3622.0680                                |
| <sup>T</sup> In1                              | -3621.1269                                  | -3622.1137                                |
| <sup>Q</sup> In1                              | -3621.1100                                  | -3622.0925                                |
| <sup>S</sup> In6                              | -3501.3604                                  | -3502.2556                                |
| <sup>T</sup> In6                              | -3501.3885                                  | -3502.2749                                |
| <sup>Q</sup> In6                              | -3501.3731                                  | -3502.2607                                |
| <sup>S</sup> In2                              | -3312.7521                                  | -3313.6323                                |
| <sup>T</sup> In2                              | -3312.7551                                  | -3313.6336                                |

|                               |            |            |
|-------------------------------|------------|------------|
| <sup>Q</sup> In2              | -3312.8026 | -3313.6723 |
| <sup>T</sup> In3              | -3576.8423 | -3577.7248 |
| <sup>Q</sup> In3              | -3576.8362 | -3577.7207 |
| <sup>T</sup> In4              | -3312.2937 | -3313.1527 |
| <sup>Q</sup> In4              | -3312.2881 | -3313.1445 |
| <sup>T</sup> In5              | -3500.9227 | -3501.7992 |
| <sup>Q</sup> In5              | -3500.9209 | -3501.7968 |
| <sup>T</sup> TS1              | -3576.8433 | -3577.7228 |
| <sup>Q</sup> TS1              | -3576.8430 | -3577.7213 |
| <sup>T</sup> TS2              | -3500.8909 | -3501.7589 |
| <sup>Q</sup> TS2              | -3500.8897 | -3501.7581 |
| MECP                          |            | -3621.2271 |
| <sup>Q</sup> In7              | -3500.8984 | -3501.7708 |
| <sup>Q</sup> In8              | -3500.9114 | -3501.7800 |
| <sup>Q</sup> In9              | -3500.9088 | -3501.7786 |
| CO <sub>2</sub>               | -188.6163  | -188.6073  |
| CO <sub>3</sub> <sup>2-</sup> | -264.0346  | -264.0242  |
| HCO <sub>3</sub> <sup>-</sup> | -264.5760  | -264.5772  |
| Phenylacetylene               | -308.3145  | -308.3950  |
| DMF                           | -248.4668  | -248.5411  |

---

### Cartesian Coordinates of Intermediates and Transition States

<sup>T</sup>Fe(iprphen)(DMF)<sub>2</sub>-1

| ATOM | X           | Y           | Z           |
|------|-------------|-------------|-------------|
| Fe   | -0.01289200 | 0.05161300  | -0.27420100 |
| N    | 1.49383700  | 1.41359000  | 0.55558600  |
| N    | -1.20220500 | 1.51330100  | 0.53447800  |
| C    | 3.37671500  | -0.07021600 | 0.41370700  |
| C    | 3.39832000  | -1.03681900 | 1.44197300  |
| C    | 3.84489300  | -2.32025600 | 1.12875300  |
| H    | 3.85710400  | -3.06941700 | 1.91793400  |
| C    | 4.27016200  | -2.67729600 | -0.15111800 |
| C    | 4.28006200  | -1.69246100 | -1.13046600 |
| H    | 4.63606900  | -1.94530100 | -2.12712500 |
| C    | 3.84573400  | -0.39007500 | -0.87072900 |
| C    | 2.81258300  | 1.29126700  | 0.66955800  |
| C    | 3.63909500  | 2.37324500  | 1.01958500  |
| H    | 4.71158800  | 2.22570500  | 1.07817800  |
| C    | 3.06411900  | 3.60968700  | 1.27721900  |
| H    | 3.68593500  | 4.46202900  | 1.53940100  |
| C    | 1.67629100  | 3.75776200  | 1.22690600  |
| C    | 0.99069800  | 4.97735700  | 1.52875800  |
| H    | 1.57671900  | 5.85717900  | 1.78156200  |

|   |             |             |             |
|---|-------------|-------------|-------------|
| C | -0.36845900 | 5.03312100  | 1.51433600  |
| H | -0.87963100 | 5.96104300  | 1.75787300  |
| C | -1.17560300 | 3.87782100  | 1.20618400  |
| C | -2.57119200 | 3.87858300  | 1.24894900  |
| H | -3.11107600 | 4.78360800  | 1.51032200  |
| C | -3.25957200 | 2.66249500  | 1.01125300  |
| H | -4.33959900 | 2.61072200  | 1.10742100  |
| C | -2.56392300 | 1.52398500  | 0.67443800  |
| C | -0.51123300 | 2.66858400  | 0.86411700  |
| C | 0.90000800  | 2.61339600  | 0.87481200  |
| C | -3.24921900 | 0.20620200  | 0.50413000  |
| C | -3.96898400 | -0.09425000 | -0.66215400 |
| C | -4.58106900 | -1.34679200 | -0.77912800 |
| H | -5.13286900 | -1.58539600 | -1.68661200 |
| C | -4.49646200 | -2.30510700 | 0.22321900  |
| C | -3.77833500 | -1.98357100 | 1.37697300  |
| H | -3.70632700 | -2.72083300 | 2.17206300  |
| C | -3.14386600 | -0.75425600 | 1.53384900  |
| C | -4.08444400 | 0.88686100  | -1.81642500 |
| H | -3.52507500 | 1.78446700  | -1.54231800 |
| C | -2.39414000 | -0.45507100 | 2.82537400  |
| H | -1.69320500 | 0.35969900  | 2.62502800  |
| C | 3.07323100  | -0.77176100 | 2.91267600  |
| H | 2.98735100  | -1.76610200 | 3.36773900  |
| C | 3.94674600  | 0.64921000  | -1.97767900 |
| H | 3.50196500  | 1.57934000  | -1.60970900 |
| C | 4.71843100  | -4.09302200 | -0.46377900 |
| H | 4.98172400  | -4.12351700 | -1.52894500 |
| C | -5.14339300 | -3.66790600 | 0.05843200  |
| C | 0.56857600  | 2.20925800  | -2.21518400 |
| C | -0.71683500 | -1.83642700 | -0.78398300 |
| C | 4.25524400  | -0.07127800 | 3.60247200  |
| H | 4.07201900  | 0.01341000  | 4.67984400  |
| H | 5.18709800  | -0.62725900 | 3.45414700  |
| H | 4.39312000  | 0.93974500  | 3.20395100  |
| C | 1.75883600  | -0.04610700 | 3.23546700  |
| H | 1.83445100  | 1.03455700  | 3.08720600  |
| H | 0.93187900  | -0.41787300 | 2.62482700  |
| H | 1.51261600  | -0.21587000 | 4.29013300  |
| C | 5.41771500  | 0.95984900  | -2.29012200 |
| H | 5.93386500  | 0.07233000  | -2.67412200 |
| H | 5.49026600  | 1.74733300  | -3.04866100 |
| H | 5.94656200  | 1.29695700  | -1.39210700 |
| C | 3.18742300  | 0.23630000  | -3.24423700 |

|   |             |             |             |
|---|-------------|-------------|-------------|
| H | 3.24108300  | 1.03456300  | -3.99382600 |
| H | 3.61766800  | -0.66641200 | -3.69241000 |
| H | 2.13303800  | 0.04024400  | -3.02774500 |
| C | 5.96954400  | -4.47711600 | 0.33780600  |
| H | 6.31477200  | -5.47859300 | 0.05740200  |
| H | 6.78487100  | -3.76870700 | 0.15681700  |
| H | 5.76061400  | -4.48392900 | 1.41402400  |
| C | 3.58572300  | -5.10292200 | -0.23573900 |
| H | 3.30205700  | -5.14471800 | 0.82236000  |
| H | 2.69475700  | -4.83136600 | -0.81192100 |
| H | 3.89973900  | -6.10823100 | -0.53819400 |
| C | -1.55941200 | -1.64297300 | 3.31754100  |
| H | -0.93761800 | -1.33388100 | 4.16505800  |
| H | -2.18476100 | -2.47541500 | 3.66002100  |
| H | -0.89945800 | -2.00761900 | 2.52270400  |
| C | -3.37490300 | 0.02698200  | 3.90354800  |
| H | -3.91519000 | 0.91815500  | 3.56576500  |
| H | -4.11135900 | -0.75219800 | 4.13522100  |
| H | -2.84225100 | 0.27793500  | 4.82818300  |
| C | -6.20495600 | -3.92648800 | 1.13583000  |
| H | -6.69817000 | -4.89020100 | 0.96631500  |
| H | -5.75353500 | -3.95379100 | 2.13440700  |
| H | -6.96987600 | -3.14303100 | 1.13167700  |
| C | -5.53904800 | 1.31554900  | -2.04806600 |
| H | -6.16479600 | 0.46518000  | -2.34380900 |
| H | -5.96861200 | 1.75041800  | -1.13894700 |
| H | -5.59429400 | 2.06552900  | -2.84537800 |
| C | -3.45831200 | 0.31767000  | -3.09691100 |
| H | -2.40670400 | 0.05837400  | -2.93377000 |
| H | -3.98514100 | -0.58257900 | -3.43397300 |
| H | -3.51189500 | 1.05436500  | -3.90769400 |
| C | -4.08896700 | -4.78321900 | 0.04437800  |
| H | -3.34051800 | -4.60717800 | -0.73564900 |
| H | -3.56521500 | -4.84092200 | 1.00575200  |
| H | -4.55852700 | -5.75588000 | -0.14075200 |
| H | -5.64819000 | -3.67445500 | -0.91617800 |
| O | 0.01366600  | 1.09514500  | -2.19985200 |
| O | 0.29005600  | -1.80138400 | 0.06508600  |
| N | -0.05284900 | 3.37235000  | -2.37700600 |
| N | -0.53035100 | -2.29221400 | -2.10015600 |
| C | 0.78571000  | -2.72880200 | -2.50455700 |
| H | 0.97179800  | -3.78498600 | -2.24190500 |
| H | 0.89238700  | -2.62555800 | -3.59034700 |
| H | 1.54941800  | -2.12027300 | -2.01723400 |

|   |             |             |             |
|---|-------------|-------------|-------------|
| C | -1.63645500 | -2.97799500 | -2.72837900 |
| H | -2.58075700 | -2.56118400 | -2.36679200 |
| H | -1.59715500 | -2.84024400 | -3.81500600 |
| H | -1.63036700 | -4.06262000 | -2.52068600 |
| C | 0.65637200  | 4.63020300  | -2.21463100 |
| H | 0.50566400  | 5.26297300  | -3.09396500 |
| H | 0.28289500  | 5.14852500  | -1.32523500 |
| H | 1.72406700  | 4.44144200  | -2.08574500 |
| C | -1.49789600 | 3.43622000  | -2.50232500 |
| H | -1.95169300 | 3.69581900  | -1.53878700 |
| H | -1.76180800 | 4.19503200  | -3.24358700 |
| H | -1.86331900 | 2.46383500  | -2.82603400 |
| H | 1.65373700  | 2.30104600  | -2.09080800 |
| H | -1.72683600 | -2.01376700 | -0.40009000 |

<sup>Q</sup>Fe(iprphen)(DMF)<sub>2</sub>-1

| ATOM | X           | Y           | Z           |
|------|-------------|-------------|-------------|
| Fe   | -0.04928100 | -0.03025800 | -0.26834300 |
| N    | -1.51532400 | -1.38951200 | 0.57367100  |
| N    | 1.19397400  | -1.50702600 | 0.56960200  |
| C    | -3.39058900 | 0.09410600  | 0.42846700  |
| C    | -3.40052500 | 1.07224500  | 1.44609300  |
| C    | -3.81802200 | 2.36139600  | 1.11596200  |
| H    | -3.82156200 | 3.11881600  | 1.89730000  |
| C    | -4.22366100 | 2.71385500  | -0.17167400 |
| C    | -4.24603700 | 1.71912400  | -1.14097400 |
| H    | -4.58778200 | 1.96920800  | -2.14334600 |
| C    | -3.84065100 | 0.41077000  | -0.86413300 |
| C    | -2.83776100 | -1.27039200 | 0.69319800  |
| C    | -3.66317800 | -2.34699600 | 1.03909400  |
| H    | -4.73514900 | -2.19910000 | 1.10392600  |
| C    | -3.08455000 | -3.59547900 | 1.28121500  |
| H    | -3.70744800 | -4.44940500 | 1.53589400  |
| C    | -1.70427500 | -3.74399000 | 1.22279500  |
| C    | -1.01741000 | -4.97444700 | 1.50549700  |
| H    | -1.60842800 | -5.85562000 | 1.74250800  |
| C    | 0.33777300  | -5.03888400 | 1.49434500  |
| H    | 0.84410600  | -5.97320500 | 1.72327000  |
| C    | 1.15197600  | -3.87814100 | 1.20782800  |
| C    | 2.53834500  | -3.87972600 | 1.26150500  |
| H    | 3.07274000  | -4.79122000 | 1.51409800  |
| C    | 3.24179600  | -2.67022900 | 1.03317400  |
| H    | 4.32174800  | -2.62719600 | 1.12660200  |
| C    | 2.54426600  | -1.52615900 | 0.70138000  |

|   |             |             |             |
|---|-------------|-------------|-------------|
| C | 0.48673900  | -2.65768000 | 0.87990600  |
| C | -0.91848700 | -2.59554000 | 0.88581400  |
| C | 3.24210300  | -0.21531200 | 0.52338600  |
| C | 3.96927800  | 0.06443000  | -0.64325000 |
| C | 4.59373500  | 1.30943100  | -0.77073700 |
| H | 5.15056400  | 1.53351600  | -1.67879000 |
| C | 4.51227700  | 2.27986600  | 0.22056500  |
| C | 3.78555000  | 1.97812800  | 1.37395600  |
| H | 3.71493000  | 2.72549500  | 2.15953600  |
| C | 3.14021200  | 0.75561400  | 1.54271800  |
| C | 4.07212100  | -0.92700900 | -1.79002500 |
| H | 3.49815500  | -1.81417200 | -1.51216200 |
| C | 2.38543600  | 0.47583600  | 2.83588800  |
| H | 1.67316700  | -0.33036400 | 2.64082200  |
| C | -3.08695600 | 0.81475700  | 2.92042200  |
| H | -3.00251900 | 1.81117400  | 3.37140600  |
| C | -3.95433200 | -0.63978800 | -1.95961900 |
| H | -3.51876200 | -1.56965800 | -1.58093100 |
| C | -4.63821400 | 4.13577900  | -0.50276300 |
| H | -4.88328700 | 4.16307900  | -1.57234600 |
| C | 5.16809100  | 3.63659700  | 0.04137900  |
| C | -0.59531900 | -2.27335900 | -2.15771900 |
| C | 0.76705600  | 1.81289400  | -0.83655600 |
| C | -4.27322400 | 0.11856400  | 3.60695200  |
| H | -4.09610800 | 0.03933800  | 4.68579800  |
| H | -5.20359300 | 0.67499700  | 3.45077900  |
| H | -4.40923300 | -0.89387100 | 3.21183900  |
| C | -1.77458500 | 0.08940300  | 3.25250800  |
| H | -1.84696900 | -0.99020300 | 3.09704100  |
| H | -0.94216600 | 0.46502300  | 2.65131100  |
| H | -1.53774600 | 0.25544300  | 4.30999400  |
| C | -5.43010500 | -0.93669100 | -2.26283000 |
| H | -5.93749600 | -0.04673600 | -2.65307800 |
| H | -5.51554400 | -1.73069800 | -3.01328700 |
| H | -5.95851700 | -1.25865900 | -1.35901400 |
| C | -3.19530600 | -0.25289000 | -3.23433800 |
| H | -3.26570700 | -1.05890500 | -3.97423200 |
| H | -3.61259100 | 0.65140300  | -3.69153000 |
| H | -2.13663800 | -0.07310400 | -3.02542300 |
| C | -5.89451900 | 4.55009200  | 0.27538100  |
| H | -6.21207900 | 5.55838200  | -0.01333600 |
| H | -6.72222400 | 3.85965000  | 0.08162900  |
| H | -5.70410400 | 4.55499900  | 1.35502500  |
| C | -3.49008500 | 5.12540900  | -0.26340100 |

|   |             |             |             |
|---|-------------|-------------|-------------|
| H | -3.22575500 | 5.17324300  | 0.79940400  |
| H | -2.59391400 | 4.83033700  | -0.81951300 |
| H | -3.77812300 | 6.13344000  | -0.58222200 |
| C | 1.56756600  | 1.67835200  | 3.32052800  |
| H | 0.93799500  | 1.38188900  | 4.16674800  |
| H | 2.20474100  | 2.50198800  | 3.66244000  |
| H | 0.91683700  | 2.05046000  | 2.52164000  |
| C | 3.35967600  | -0.01311400 | 3.91703900  |
| H | 3.88711100  | -0.91419900 | 3.58530700  |
| H | 4.10707400  | 0.75731300  | 4.14280000  |
| H | 2.82382100  | -0.24995300 | 4.84349100  |
| C | 6.22094400  | 3.90719800  | 1.12420500  |
| H | 6.72023800  | 4.86573000  | 0.94361800  |
| H | 5.76099800  | 3.95307700  | 2.11820300  |
| H | 6.98216000  | 3.12028900  | 1.13948800  |
| C | 5.52009400  | -1.37979700 | -2.01621600 |
| H | 6.16002700  | -0.54077700 | -2.31387600 |
| H | 5.94041000  | -1.81773000 | -1.10427900 |
| H | 5.56512400  | -2.13384000 | -2.81026800 |
| C | 3.45626000  | -0.35663800 | -3.07497600 |
| H | 2.41070600  | -0.07300400 | -2.91278900 |
| H | 4.00107400  | 0.52931800  | -3.42112900 |
| H | 3.49376200  | -1.10133900 | -3.87915700 |
| C | 4.11848400  | 4.75581600  | -0.00023500 |
| H | 3.37619800  | 4.57013100  | -0.78389600 |
| H | 3.58668300  | 4.83077600  | 0.95552000  |
| H | 4.59362300  | 5.72349600  | -0.19668600 |
| H | 5.68182800  | 3.62538700  | -0.92850600 |
| O | -0.05239100 | -1.15290200 | -2.13050800 |
| O | -0.22066100 | 1.83530600  | 0.03674900  |
| N | 0.03801600  | -3.42241700 | -2.36460000 |
| N | 0.57561200  | 2.25557600  | -2.15428400 |
| C | -0.74541400 | 2.67843500  | -2.55749000 |
| H | -0.94579500 | 3.72973300  | -2.28763700 |
| H | -0.84824000 | 2.58062300  | -3.64398400 |
| H | -1.50391300 | 2.05787400  | -2.07664100 |
| C | 1.67375000  | 2.94954000  | -2.78952200 |
| H | 2.62306600  | 2.54445000  | -2.42782200 |
| H | 1.63274000  | 2.80523800  | -3.87510800 |
| H | 1.65699900  | 4.03479300  | -2.58712200 |
| C | -0.64999200 | -4.69379800 | -2.21626700 |
| H | -0.49532000 | -5.30948000 | -3.10683600 |
| H | -0.26358000 | -5.21998000 | -1.33716800 |
| H | -1.71953700 | -4.52333600 | -2.07820100 |

|   |             |             |             |
|---|-------------|-------------|-------------|
| C | 1.48242500  | -3.45961700 | -2.50894300 |
| H | 1.95295400  | -3.71006700 | -1.55086400 |
| H | 1.75074300  | -4.21387400 | -3.25298200 |
| H | 1.82624900  | -2.48078000 | -2.83743000 |
| H | -1.67601700 | -2.38001200 | -2.01013100 |
| H | 1.79052600  | 1.94975500  | -0.47662200 |

<sup>5</sup>Fe(iprphen)(DMF)<sub>2</sub>-1

| ATOM | X           | Y           | Z           |
|------|-------------|-------------|-------------|
| Fe   | 0.08767400  | -0.06296500 | 0.16922500  |
| N    | 1.46582800  | -1.28964000 | -0.68461400 |
| N    | -1.16780100 | -1.43544600 | -0.54497700 |
| C    | 3.37216000  | 0.19133000  | -0.49176300 |
| C    | 3.38668600  | 1.24731100  | -1.42698400 |
| C    | 3.86232800  | 2.48860700  | -1.00632200 |
| H    | 3.85833800  | 3.30887900  | -1.72113800 |
| C    | 4.33563100  | 2.71541200  | 0.28656800  |
| C    | 4.36510600  | 1.64009900  | 1.16498700  |
| H    | 4.76104900  | 1.79068300  | 2.16712300  |
| C    | 3.89471200  | 0.37686800  | 0.79874700  |
| C    | 2.78515700  | -1.13513600 | -0.84559100 |
| C    | 3.59997900  | -2.18806100 | -1.30271800 |
| H    | 4.66668000  | -2.01572700 | -1.39744800 |
| C    | 3.05243400  | -3.41602100 | -1.60279000 |
| H    | 3.67618500  | -4.23896300 | -1.93833000 |
| C    | 1.66159100  | -3.58866500 | -1.48008900 |
| C    | 0.97976800  | -4.81605600 | -1.78322600 |
| H    | 1.56793800  | -5.67096600 | -2.10319400 |
| C    | -0.37082100 | -4.90283300 | -1.68420600 |
| H    | -0.88481900 | -5.82874300 | -1.92409700 |
| C    | -1.15899700 | -3.76922500 | -1.28457200 |
| C    | -2.56393700 | -3.78294600 | -1.23346200 |
| H    | -3.11113800 | -4.68759300 | -1.48080500 |
| C    | -3.22210700 | -2.62258600 | -0.89726900 |
| H    | -4.30552100 | -2.57871600 | -0.88650200 |
| C    | -2.50606000 | -1.45538600 | -0.56370800 |
| C    | -0.51295400 | -2.56819200 | -0.94271200 |
| C    | 0.91437000  | -2.48354100 | -1.03541400 |
| C    | -3.28467000 | -0.21277200 | -0.28691600 |
| C    | -3.74439300 | 0.06511300  | 1.00841400  |
| C    | -4.53428800 | 1.19527600  | 1.20614400  |
| H    | -4.89443200 | 1.42524500  | 2.20621900  |
| C    | -4.85819400 | 2.06106200  | 0.16289100  |
| C    | -4.37171100 | 1.76930700  | -1.10917700 |

|   |             |             |             |
|---|-------------|-------------|-------------|
| H | -4.58942800 | 2.44803200  | -1.93041100 |
| C | -3.58557400 | 0.64350700  | -1.35686500 |
| C | -3.36403000 | -0.82559800 | 2.17826200  |
| H | -2.47598500 | -1.38536300 | 1.87637700  |
| C | -3.02441500 | 0.42039500  | -2.75374300 |
| H | -2.42184400 | -0.49378100 | -2.74271200 |
| C | 3.02302900  | 1.12032000  | -2.90598100 |
| H | 2.93924100  | 2.15249900  | -3.26764400 |
| C | 4.01340800  | -0.76274200 | 1.80113100  |
| H | 3.57432900  | -1.65983500 | 1.35328200  |
| C | 4.78773500  | 4.09430000  | 0.73117400  |
| H | 5.22243500  | 3.98650300  | 1.73331500  |
| C | -5.64963500 | 3.32741100  | 0.43737000  |
| C | 0.65781600  | -2.43474000 | 1.97105600  |
| C | -0.76977200 | 1.64611800  | 0.44444200  |
| C | 4.18141600  | 0.47391800  | -3.68306500 |
| H | 3.97731700  | 0.50064100  | -4.75976000 |
| H | 5.12626800  | 0.99669200  | -3.49938200 |
| H | 4.31006400  | -0.57521500 | -3.39397900 |
| C | 1.69020000  | 0.44138000  | -3.25110500 |
| H | 1.76287000  | -0.65014500 | -3.20987300 |
| H | 0.90064700  | 0.76562100  | -2.56889400 |
| H | 1.41320300  | 0.70737200  | -4.27827600 |
| C | 5.48811900  | -1.08981900 | 2.07692400  |
| H | 5.99870000  | -0.24250600 | 2.54870900  |
| H | 5.56936700  | -1.95000800 | 2.75091300  |
| H | 6.01766100  | -1.32847900 | 1.14820100  |
| C | 3.25582200  | -0.47723800 | 3.10262600  |
| H | 3.33285600  | -1.33307900 | 3.78357100  |
| H | 3.66583300  | 0.39788200  | 3.61858700  |
| H | 2.19704400  | -0.28811600 | 2.90538900  |
| C | 5.87186700  | 4.67593400  | -0.18502200 |
| H | 6.23136900  | 5.63295300  | 0.20917400  |
| H | 6.72608100  | 3.99535900  | -0.26617500 |
| H | 5.48538600  | 4.85650700  | -1.19453300 |
| C | 3.58811400  | 5.04640100  | 0.84210500  |
| H | 3.11338100  | 5.18995600  | -0.13586200 |
| H | 2.83154100  | 4.64738700  | 1.52631300  |
| H | 3.90609600  | 6.02777100  | 1.21235500  |
| C | -2.08511600 | 1.56909200  | -3.14958000 |
| H | -1.61635400 | 1.35874600  | -4.11839700 |
| H | -2.63490300 | 2.51354500  | -3.24401400 |
| H | -1.29639000 | 1.70048200  | -2.39993500 |
| C | -4.13810300 | 0.21688100  | -3.78861700 |

|   |             |             |             |
|---|-------------|-------------|-------------|
| H | -4.77768600 | -0.63087800 | -3.51836300 |
| H | -4.77336000 | 1.10669100  | -3.86917800 |
| H | -3.70858200 | 0.02220200  | -4.77779700 |
| C | -6.79589400 | 3.54305000  | -0.55744900 |
| H | -7.38535800 | 4.42193500  | -0.27329200 |
| H | -6.41912100 | 3.71353200  | -1.57234800 |
| H | -7.46459200 | 2.67614300  | -0.58547500 |
| C | -4.47856500 | -1.82879700 | 2.50200800  |
| H | -5.39722000 | -1.30772000 | 2.79755900  |
| H | -4.71187500 | -2.45945500 | 1.63687000  |
| H | -4.18115300 | -2.48484800 | 3.32919000  |
| C | -2.96069200 | -0.02073500 | 3.41953300  |
| H | -2.23538000 | 0.75640500  | 3.15633400  |
| H | -3.82510700 | 0.45753200  | 3.89549300  |
| H | -2.50658200 | -0.68570100 | 4.16371600  |
| C | -4.70759100 | 4.54060000  | 0.46557400  |
| H | -3.91732400 | 4.40316600  | 1.21157400  |
| H | -4.22827900 | 4.67928400  | -0.51111700 |
| H | -5.25705300 | 5.45732200  | 0.70872000  |
| H | -6.09189400 | 3.22575400  | 1.43690900  |
| O | -0.00817800 | -1.39319000 | 1.89556800  |
| O | 0.21147200  | 1.61734600  | -0.53361700 |
| N | 0.16107400  | -3.62068000 | 2.32166200  |
| N | -0.55249200 | 2.52322500  | 1.58955300  |
| C | 0.60765700  | 2.18694400  | 2.39061500  |
| H | 1.57087000  | 2.33303300  | 1.86718000  |
| H | 0.62748300  | 2.80450500  | 3.29897000  |
| H | 0.54246400  | 1.13646700  | 2.69083100  |
| C | -0.52413200 | 3.92508000  | 1.20558100  |
| H | -1.42536300 | 4.16371800  | 0.62831800  |
| H | -0.50808800 | 4.56793300  | 2.09624600  |
| H | 0.35463600  | 4.18360400  | 0.58520700  |
| C | 0.96960600  | -4.82622900 | 2.24355600  |
| H | 0.94915700  | -5.35899600 | 3.19835000  |
| H | 0.58796500  | -5.48440700 | 1.45579100  |
| H | 2.00280900  | -4.56240200 | 2.00800200  |
| C | -1.26218700 | -3.75823300 | 2.59073800  |
| H | -1.83786500 | -3.74701900 | 1.65771900  |
| H | -1.43309500 | -4.70455600 | 3.10613200  |
| H | -1.59858400 | -2.93609800 | 3.22405200  |
| H | 1.72965700  | -2.44997100 | 1.73957200  |
| H | -1.75996500 | 1.89193600  | 0.03725100  |

<sup>T</sup>Fe(iprphen)(DMF)<sub>2</sub>-2

| ATOM | X           | Y           | Z           |
|------|-------------|-------------|-------------|
| Fe   | 0.08279600  | 0.63147800  | -0.35320000 |
| N    | -1.12100500 | 2.15566100  | -0.36296300 |
| N    | 1.46660700  | 2.03302200  | -0.13558100 |
| C    | -3.12909200 | 0.90200100  | 0.20780000  |
| C    | -3.93940700 | 0.15467900  | -0.66472600 |
| C    | -4.55966600 | -0.99979200 | -0.18616400 |
| H    | -5.19701100 | -1.57143300 | -0.85714000 |
| C    | -4.40166000 | -1.43229200 | 1.13176400  |
| C    | -3.57716200 | -0.68579000 | 1.96808000  |
| H    | -3.45424900 | -1.00416800 | 3.00136900  |
| C    | -2.94002900 | 0.47997200  | 1.53704400  |
| C    | -2.47242900 | 2.17604500  | -0.21761600 |
| C    | -3.18755400 | 3.35844300  | -0.30705200 |
| H    | -4.26378300 | 3.32913800  | -0.17643100 |
| C    | -2.52627500 | 4.58690000  | -0.50893700 |
| H    | -3.09109400 | 5.51114300  | -0.58806400 |
| C    | -1.13845300 | 4.60816300  | -0.52662500 |
| C    | -0.32466000 | 5.80016600  | -0.59920900 |
| H    | -0.82407500 | 6.75887800  | -0.70970500 |
| C    | 1.02766400  | 5.73834800  | -0.51382300 |
| H    | 1.62163700  | 6.64729700  | -0.55935800 |
| C    | 1.71813200  | 4.48121200  | -0.34407800 |
| C    | 3.09132800  | 4.34569500  | -0.20901900 |
| H    | 3.73583600  | 5.21987600  | -0.23021900 |
| C    | 3.63395200  | 3.06136000  | -0.04294400 |
| H    | 4.70478400  | 2.92082200  | 0.05345300  |
| C    | 2.81299800  | 1.94156100  | -0.01261100 |
| C    | 0.92930400  | 3.30055100  | -0.30236700 |
| C    | -0.46008400 | 3.36626900  | -0.41898200 |
| C    | 3.41097500  | 0.58182200  | 0.13132000  |
| C    | 3.60691000  | 0.03471700  | 1.40801600  |
| C    | 4.18325300  | -1.23059700 | 1.51050200  |
| H    | 4.34782800  | -1.66645400 | 2.49303000  |
| C    | 4.53031200  | -1.97448800 | 0.38516400  |
| C    | 4.30881400  | -1.41304300 | -0.87082600 |
| H    | 4.56664200  | -1.98284500 | -1.76129200 |
| C    | 3.76129500  | -0.13958400 | -1.01973400 |
| C    | 3.21347700  | 0.80560500  | 2.65941700  |
| H    | 2.46226800  | 1.54792300  | 2.36812700  |
| C    | 3.54632000  | 0.42385500  | -2.41686300 |
| H    | 3.14520800  | 1.43735900  | -2.31856200 |
| C    | -4.18193300 | 0.60318100  | -2.09754500 |
| H    | -3.46420100 | 1.39860900  | -2.32229900 |

|   |             |             |             |
|---|-------------|-------------|-------------|
| C | -2.14980300 | 1.29818400  | 2.55213500  |
| H | -1.67810800 | 2.13587300  | 2.03362600  |
| C | -5.13701400 | -2.64959700 | 1.66646600  |
| H | -4.91393000 | -2.71602600 | 2.73903400  |
| C | 5.09065900  | -3.37776800 | 0.52955000  |
| H | 5.25311100  | -3.55609700 | 1.60041300  |
| C | 4.86757900  | 0.53315000  | -3.18860200 |
| H | 5.59019100  | 1.14576600  | -2.63853700 |
| H | 5.31806500  | -0.45229500 | -3.35493000 |
| H | 4.70186800  | 0.99524100  | -4.16835100 |
| C | 2.50726200  | -0.39601200 | -3.19156100 |
| H | 2.33658200  | 0.03730200  | -4.18396000 |
| H | 2.83531600  | -1.43368100 | -3.32815300 |
| H | 1.55345100  | -0.40630500 | -2.65305500 |
| C | 6.44052700  | -3.54458100 | -0.17905500 |
| H | 7.16945100  | -2.81147200 | 0.18245600  |
| H | 6.84576200  | -4.54732100 | -0.00284400 |
| H | 6.33878500  | -3.41300200 | -1.26257400 |
| C | 4.07081800  | -4.41326100 | 0.03558700  |
| H | 3.88324200  | -4.29135100 | -1.03831900 |
| H | 4.43611100  | -5.43306100 | 0.20246500  |
| H | 3.11627600  | -4.28988500 | 0.55706600  |
| C | 4.42067400  | 1.56076600  | 3.23425300  |
| H | 5.21190300  | 0.85727600  | 3.52006300  |
| H | 4.83503900  | 2.26010600  | 2.50071700  |
| H | 4.13311500  | 2.13018300  | 4.12580700  |
| C | 2.57147100  | -0.08407900 | 3.72950800  |
| H | 3.29970400  | -0.76212100 | 4.18906500  |
| H | 2.15135500  | 0.53551400  | 4.52946200  |
| H | 1.76550600  | -0.68630100 | 3.30062900  |
| C | -5.59248000 | 1.19084400  | -2.24855900 |
| H | -6.35414500 | 0.42892800  | -2.04316000 |
| H | -5.75440800 | 2.02204500  | -1.55416600 |
| H | -5.74961500 | 1.56125500  | -3.26801400 |
| C | -3.94505100 | -0.51711200 | -3.11566700 |
| H | -4.67513300 | -1.32793700 | -3.00729600 |
| H | -4.03899600 | -0.12489700 | -4.13470300 |
| H | -2.94225700 | -0.93142200 | -2.98958000 |
| C | -4.65447300 | -3.95115900 | 1.01640400  |
| H | -5.17534200 | -4.81378500 | 1.44675400  |
| H | -4.84728300 | -3.94631100 | -0.06280700 |
| H | -3.57931400 | -4.09352200 | 1.17385600  |
| C | -6.65726600 | -2.49732500 | 1.52000000  |
| H | -6.95171900 | -2.46074000 | 0.46466000  |

|   |             |             |             |
|---|-------------|-------------|-------------|
| H | -7.17288500 | -3.34694500 | 1.98139400  |
| H | -7.00933800 | -1.57871400 | 2.00073400  |
| C | -3.09389000 | 1.89485400  | 3.60610000  |
| H | -3.87091600 | 2.50502200  | 3.13258600  |
| H | -3.58822500 | 1.10871500  | 4.18879300  |
| H | -2.53524000 | 2.53072400  | 4.30223900  |
| C | -1.02262200 | 0.48972800  | 3.20431600  |
| H | -0.44243800 | 1.12641600  | 3.88203800  |
| H | -1.41035300 | -0.35275700 | 3.78944000  |
| H | -0.34258800 | 0.09147000  | 2.44445500  |
| O | -0.90651700 | -0.54984400 | -1.46869900 |
| C | -1.10088800 | -1.78838000 | -1.07778500 |
| H | -1.73125100 | -1.94791000 | -0.19262300 |
| O | 0.85010300  | -0.94731200 | 0.39838600  |
| C | 0.64794600  | -2.10189400 | -0.17429800 |
| H | 1.19739900  | -2.31768700 | -1.10366100 |
| N | -1.29608300 | -2.75929800 | -2.04440300 |
| C | -2.34138600 | -3.74514600 | -1.91257400 |
| H | -3.22829800 | -3.47333400 | -2.50545400 |
| H | -1.98838500 | -4.72772300 | -2.24814100 |
| H | -2.64416100 | -3.82491600 | -0.86784200 |
| C | -0.72548800 | -2.60142100 | -3.36118100 |
| H | -0.34046400 | -3.56445900 | -3.71792000 |
| H | -1.46728800 | -2.23886300 | -4.08853800 |
| H | 0.09142400  | -1.88128200 | -3.32417600 |
| N | 0.56860400  | -3.22206700 | 0.64850800  |
| C | -0.08662900 | -3.06937200 | 1.93038500  |
| H | -1.18562100 | -3.03456100 | 1.83336400  |
| H | 0.17555000  | -3.91580600 | 2.57196200  |
| H | 0.24586500  | -2.14520600 | 2.40203800  |
| C | 0.40458500  | -4.51718300 | 0.02403700  |
| H | 0.87685500  | -5.28724100 | 0.64397900  |
| H | -0.65331000 | -4.78576400 | -0.10584700 |
| H | 0.88589900  | -4.51887000 | -0.95725200 |

<sup>Q</sup>Fe(iprphen)(DMF)<sub>2</sub>-2

| ATOM | X           | Y           | Z           |
|------|-------------|-------------|-------------|
| Fe   | 0.07933300  | 0.60287500  | -0.37373400 |
| N    | -1.13035800 | 2.15850300  | -0.37474800 |
| N    | 1.48306900  | 2.03806100  | -0.13516200 |
| C    | -3.13952100 | 0.92325900  | 0.21598300  |
| C    | -3.97670900 | 0.17159100  | -0.62814400 |
| C    | -4.59075200 | -0.97537700 | -0.12408200 |
| H    | -5.24577600 | -1.55039400 | -0.77484400 |

|   |             |             |             |
|---|-------------|-------------|-------------|
| C | -4.40379900 | -1.39694000 | 1.19336500  |
| C | -3.55417600 | -0.64833700 | 2.00181600  |
| H | -3.40976700 | -0.95692700 | 3.03527100  |
| C | -2.91891300 | 0.50829000  | 1.54399600  |
| C | -2.48459800 | 2.18856000  | -0.23929300 |
| C | -3.19202500 | 3.36963300  | -0.35032700 |
| H | -4.26767500 | 3.35310700  | -0.21119500 |
| C | -2.51691800 | 4.59550600  | -0.56655100 |
| H | -3.07391400 | 5.52317300  | -0.65994400 |
| C | -1.12943000 | 4.60788500  | -0.56604000 |
| C | -0.31059700 | 5.79796800  | -0.63451100 |
| H | -0.80715900 | 6.75608800  | -0.76335200 |
| C | 1.04019300  | 5.73834600  | -0.51952700 |
| H | 1.63485200  | 6.64725200  | -0.56028600 |
| C | 1.72429200  | 4.48345200  | -0.33238800 |
| C | 3.09619300  | 4.34719400  | -0.18510500 |
| H | 3.73746100  | 5.22437800  | -0.20450200 |
| C | 3.64525400  | 3.07008000  | -0.01572700 |
| H | 4.71594700  | 2.93086400  | 0.08025700  |
| C | 2.81856000  | 1.94719100  | 0.00292400  |
| C | 0.93214500  | 3.29940000  | -0.29962200 |
| C | -0.45556600 | 3.36288700  | -0.43556700 |
| C | 3.41620100  | 0.58543300  | 0.13205400  |
| C | 3.64747900  | 0.03871200  | 1.40232100  |
| C | 4.21902500  | -1.23042800 | 1.48819100  |
| H | 4.40932000  | -1.66692800 | 2.46587800  |
| C | 4.53092800  | -1.97505400 | 0.35335100  |
| C | 4.27754100  | -1.41151000 | -0.89599100 |
| H | 4.51311400  | -1.98049600 | -1.79318800 |
| C | 3.72926100  | -0.13713800 | -1.02938900 |
| C | 3.29741200  | 0.81113000  | 2.66573400  |
| H | 2.56882000  | 1.58251500  | 2.39303300  |
| C | 3.49310400  | 0.43427600  | -2.42043000 |
| H | 3.05634200  | 1.43189300  | -2.31275100 |
| C | -4.25213500 | 0.60347300  | -2.06014800 |
| H | -3.54063900 | 1.39702300  | -2.30927800 |
| C | -2.09869100 | 1.32675400  | 2.53568800  |
| H | -1.61249100 | 2.14233900  | 1.99648600  |
| C | -5.12741600 | -2.60830300 | 1.75648800  |
| H | -4.89663200 | -2.65196200 | 2.82866200  |
| C | 5.09493300  | -3.37868000 | 0.47944300  |
| H | 5.26139700  | -3.56898800 | 1.54760900  |
| C | 4.81571300  | 0.59933600  | -3.18088700 |
| H | 5.51103700  | 1.23114900  | -2.61767900 |

|   |             |             |             |
|---|-------------|-------------|-------------|
| H | 5.30093400  | -0.36878600 | -3.35135200 |
| H | 4.64248800  | 1.06530700  | -4.15748700 |
| C | 2.49117200  | -0.41070000 | -3.21728700 |
| H | 2.31735200  | 0.03162200  | -4.20493300 |
| H | 2.85642900  | -1.43382700 | -3.36617000 |
| H | 1.52932700  | -0.46786800 | -2.69592700 |
| C | 6.44371000  | -3.52927000 | -0.23532400 |
| H | 7.17035600  | -2.79773400 | 0.13395100  |
| H | 6.85440000  | -4.53242400 | -0.07456800 |
| H | 6.33710500  | -3.38266200 | -1.31650300 |
| C | 4.08011900  | -4.41407000 | -0.02494600 |
| H | 3.89376300  | -4.28464100 | -1.09817500 |
| H | 4.45091100  | -5.43320100 | 0.13364600  |
| H | 3.12367300  | -4.29980100 | 0.49512100  |
| C | 4.53784800  | 1.51828800  | 3.23042800  |
| H | 5.30852400  | 0.78572500  | 3.49863700  |
| H | 4.96588200  | 2.20983100  | 2.49725500  |
| H | 4.28253600  | 2.08870800  | 4.13106500  |
| C | 2.63882200  | -0.06684600 | 3.73577200  |
| H | 3.34606200  | -0.78317100 | 4.16917200  |
| H | 2.26213900  | 0.55751400  | 4.55350600  |
| H | 1.79843400  | -0.62666200 | 3.31564300  |
| C | -5.66597100 | 1.18852100  | -2.18784300 |
| H | -6.42269800 | 0.43034200  | -1.95264100 |
| H | -5.81185100 | 2.03087100  | -1.50345800 |
| H | -5.84666200 | 1.54232800  | -3.20932900 |
| C | -4.03692700 | -0.52898000 | -3.06982900 |
| H | -4.76746100 | -1.33631700 | -2.93977400 |
| H | -4.14763800 | -0.14796000 | -4.09149800 |
| H | -3.03361800 | -0.94557700 | -2.95649200 |
| C | -4.63580300 | -3.91708300 | 1.12780800  |
| H | -5.14133600 | -4.77746500 | 1.58054200  |
| H | -4.84039900 | -3.93532600 | 0.05093900  |
| H | -3.55704900 | -4.04254000 | 1.27568300  |
| C | -6.64986700 | -2.47406700 | 1.61763600  |
| H | -6.95281900 | -2.46319000 | 0.56413800  |
| H | -7.15365900 | -3.31899100 | 2.10032600  |
| H | -7.00811900 | -1.54923900 | 2.08161500  |
| C | -3.01795000 | 1.96471900  | 3.58731600  |
| H | -3.78220600 | 2.58724500  | 3.10929500  |
| H | -3.52780800 | 1.20074100  | 4.18598300  |
| H | -2.43759800 | 2.59714800  | 4.26877300  |
| C | -0.98571100 | 0.50400800  | 3.19663800  |
| H | -0.37396300 | 1.14477600  | 3.84199500  |

|   |             |             |             |
|---|-------------|-------------|-------------|
| H | -1.38916700 | -0.30375800 | 3.81874000  |
| H | -0.32822400 | 0.05183400  | 2.44647100  |
| O | -0.97275700 | -0.57767800 | -1.47955900 |
| C | -1.16382100 | -1.80686900 | -1.08227800 |
| H | -1.74840700 | -1.97029400 | -0.16708600 |
| O | 0.88586100  | -0.99416400 | 0.37051100  |
| C | 0.66764100  | -2.13760200 | -0.20291100 |
| H | 1.15496000  | -2.34078600 | -1.16868300 |
| N | -1.37267200 | -2.78771600 | -2.03601300 |
| C | -2.40952600 | -3.77703800 | -1.87097700 |
| H | -3.32144100 | -3.50503300 | -2.42499500 |
| H | -2.06654100 | -4.75564400 | -2.22791100 |
| H | -2.66900800 | -3.86713200 | -0.81521400 |
| C | -0.84138800 | -2.62812400 | -3.36875000 |
| H | -0.46956700 | -3.59161400 | -3.73815500 |
| H | -1.60071200 | -2.26123700 | -4.07583600 |
| H | -0.02067300 | -1.91082000 | -3.35310700 |
| N | 0.61313000  | -3.26869300 | 0.60380100  |
| C | 0.02843800  | -3.12517800 | 1.92021400  |
| H | -1.07270600 | -3.06005000 | 1.88022900  |
| H | 0.30017400  | -3.99112400 | 2.53111200  |
| H | 0.41085900  | -2.22000600 | 2.39140500  |
| C | 0.40097300  | -4.55164600 | -0.03073800 |
| H | 0.90910200  | -5.33633100 | 0.54092200  |
| H | -0.66499700 | -4.81236600 | -0.09563100 |
| H | 0.81453600  | -4.53552100 | -1.04242400 |

<sup>5</sup>Fe(iprphen)(DMF)<sub>2</sub>-2

| ATOM | X           | Y           | Z           |
|------|-------------|-------------|-------------|
| Fe   | 0.02529600  | 0.65839400  | 0.04978100  |
| N    | -1.24744000 | 2.10730600  | -0.01784900 |
| N    | 1.28171100  | 2.02203900  | -0.08609900 |
| C    | -3.20330100 | 0.74766200  | 0.42299000  |
| C    | -3.98398600 | 0.11706100  | -0.56774800 |
| C    | -4.55611200 | -1.12639700 | -0.28806700 |
| H    | -5.17434900 | -1.60283600 | -1.04657100 |
| C    | -4.39607200 | -1.75233000 | 0.94929300  |
| C    | -3.60390300 | -1.11832100 | 1.90355500  |
| H    | -3.49081500 | -1.58573000 | 2.87935500  |
| C    | -3.00640600 | 0.12312100  | 1.67021600  |
| C    | -2.59032500 | 2.08788900  | 0.16446000  |
| C    | -3.36165400 | 3.23766500  | 0.12175600  |
| H    | -4.43159100 | 3.15832900  | 0.28425300  |
| C    | -2.76430400 | 4.48848900  | -0.16239300 |

|   |             |             |             |
|---|-------------|-------------|-------------|
| H | -3.37324400 | 5.38730600  | -0.21940600 |
| C | -1.39947200 | 4.55274200  | -0.35631900 |
| C | -0.63298300 | 5.74636200  | -0.63134900 |
| H | -1.16266200 | 6.68981700  | -0.74281000 |
| C | 0.71983600  | 5.70716500  | -0.74085300 |
| H | 1.27155100  | 6.62247900  | -0.94489800 |
| C | 1.48111200  | 4.48171900  | -0.57513300 |
| C | 2.85313800  | 4.38476000  | -0.63275100 |
| H | 3.47747600  | 5.25356000  | -0.81895300 |
| C | 3.43105900  | 3.09230200  | -0.43488200 |
| H | 4.51008400  | 2.97010700  | -0.47708800 |
| C | 2.67121100  | 1.98137100  | -0.18546200 |
| C | 0.71940200  | 3.30192100  | -0.32279500 |
| C | -0.65039700 | 3.34014800  | -0.25016000 |
| C | 3.34814000  | 0.66673100  | 0.02372400  |
| C | 3.66832400  | 0.24649600  | 1.32575300  |
| C | 4.41849400  | -0.91729100 | 1.49641200  |
| H | 4.69179300  | -1.23332400 | 2.50119600  |
| C | 4.85278800  | -1.68191900 | 0.41499900  |
| C | 4.48417400  | -1.27347200 | -0.86613300 |
| H | 4.79548300  | -1.86596800 | -1.72445200 |
| C | 3.72994400  | -0.11578900 | -1.08014300 |
| C | 3.25309400  | 1.06633500  | 2.53726000  |
| H | 2.48625000  | 1.77349200  | 2.20823000  |
| C | 3.35070700  | 0.27716400  | -2.50042700 |
| H | 2.69263800  | 1.14923500  | -2.43916800 |
| C | -4.28519900 | 0.78547700  | -1.90460000 |
| H | -3.72520400 | 1.72306300  | -1.94545900 |
| C | -2.28920100 | 0.83119900  | 2.81347600  |
| H | -1.72674000 | 1.66816500  | 2.39254700  |
| C | -5.13546800 | -3.03418200 | 1.29771300  |
| H | -4.90115300 | -3.26616900 | 2.34441400  |
| C | 5.68421900  | -2.93250800 | 0.64171300  |
| H | 5.94004700  | -2.96326300 | 1.70869100  |
| C | 4.58786200  | 0.68886100  | -3.30833600 |
| H | 5.10077700  | 1.52883600  | -2.82731600 |
| H | 5.30053400  | -0.14053400 | -3.39209300 |
| H | 4.30506600  | 0.99472500  | -4.32221600 |
| C | 2.56551700  | -0.83695800 | -3.20437200 |
| H | 2.26405400  | -0.51568800 | -4.20834500 |
| H | 3.16002800  | -1.75195200 | -3.31276700 |
| H | 1.65765500  | -1.07916700 | -2.64224000 |
| C | 6.99752900  | -2.90712500 | -0.15015000 |
| H | 7.57864500  | -2.00821500 | 0.08084000  |

|   |             |             |             |
|---|-------------|-------------|-------------|
| H | 7.60813700  | -3.78389300 | 0.09329400  |
| H | 6.81170500  | -2.92075000 | -1.23035400 |
| C | 4.87482700  | -4.19644700 | 0.32576700  |
| H | 4.59031200  | -4.22177500 | -0.73332200 |
| H | 5.45751200  | -5.09959900 | 0.53980700  |
| H | 3.95966200  | -4.22867200 | 0.92656500  |
| C | 4.44131300  | 1.87799900  | 3.07057200  |
| H | 5.25033400  | 1.21500300  | 3.40116000  |
| H | 4.83713000  | 2.54008600  | 2.29304700  |
| H | 4.13750900  | 2.49477900  | 3.92461600  |
| C | 2.62701800  | 0.20360000  | 3.63928400  |
| H | 3.36263500  | -0.46145100 | 4.10730800  |
| H | 2.21433100  | 0.84253900  | 4.42846500  |
| H | 1.81792500  | -0.41092500 | 3.23302900  |
| C | -5.77613300 | 1.14283200  | -1.99552300 |
| H | -6.40217400 | 0.24252600  | -1.98419700 |
| H | -6.08079000 | 1.77492700  | -1.15446500 |
| H | -5.98335100 | 1.68530700  | -2.92479400 |
| C | -3.84590100 | -0.05244100 | -3.11059800 |
| H | -4.29688500 | -1.05201700 | -3.10542200 |
| H | -4.14530000 | 0.44270100  | -4.04096500 |
| H | -2.75875500 | -0.16205300 | -3.12566200 |
| C | -4.69044200 | -4.23076300 | 0.45065600  |
| H | -5.24411400 | -5.13172200 | 0.73700600  |
| H | -4.87273800 | -4.05095500 | -0.61531300 |
| H | -3.62339400 | -4.43554800 | 0.59144900  |
| C | -6.65485300 | -2.83444300 | 1.19880100  |
| H | -6.96017900 | -2.63811200 | 0.16448200  |
| H | -7.18207700 | -3.73248700 | 1.53930900  |
| H | -6.98114900 | -1.98928600 | 1.81365700  |
| C | -3.32428800 | 1.40987100  | 3.78982200  |
| H | -4.00829000 | 2.09071500  | 3.27160900  |
| H | -3.91975500 | 0.61138000  | 4.24898600  |
| H | -2.82697000 | 1.96718600  | 4.59187400  |
| C | -1.27955900 | -0.06406700 | 3.53952200  |
| H | -0.74577200 | 0.51584100  | 4.30092300  |
| H | -1.76406800 | -0.90591300 | 4.04844000  |
| H | -0.53913700 | -0.46181500 | 2.83818400  |
| O | -0.58617700 | -0.50490200 | -1.47567700 |
| C | -1.25946800 | -1.54659400 | -1.37701600 |
| H | -1.72490900 | -1.83909200 | -0.42779400 |
| O | 0.79730900  | -1.05317500 | 0.84912200  |
| C | 1.23112500  | -2.07597300 | 0.29144300  |
| H | 2.01893600  | -2.01386500 | -0.46635200 |

|   |             |             |             |
|---|-------------|-------------|-------------|
| N | -1.47579300 | -2.38317200 | -2.39004300 |
| C | -2.30246100 | -3.56279600 | -2.22730600 |
| H | -3.23025300 | -3.46112500 | -2.80083100 |
| H | -1.76259100 | -4.44781600 | -2.57701600 |
| H | -2.55238200 | -3.69298900 | -1.17497200 |
| C | -0.95196500 | -2.12008500 | -3.71949500 |
| H | -0.21778000 | -2.88529000 | -3.99091800 |
| H | -1.77169500 | -2.13770200 | -4.44455500 |
| H | -0.47667900 | -1.14061100 | -3.73178900 |
| N | 0.77888800  | -3.30356200 | 0.54686800  |
| C | -0.26738500 | -3.53142300 | 1.53074400  |
| H | -1.01903200 | -4.20605100 | 1.10958000  |
| H | 0.15161300  | -3.98993000 | 2.43221100  |
| H | -0.73435300 | -2.58179300 | 1.79268400  |
| C | 1.28769200  | -4.46209100 | -0.16656900 |
| H | 1.70809200  | -5.18785500 | 0.53607700  |
| H | 0.47480200  | -4.93843500 | -0.72426700 |
| H | 2.06557900  | -4.15278600 | -0.86661400 |

<sup>s</sup>In1

| ATOM | X           | Y           | Z           |
|------|-------------|-------------|-------------|
| Fe   | 0.26310500  | -0.18576800 | -0.13876800 |
| N    | 1.88699800  | -1.15090600 | -0.81801300 |
| N    | -0.64772200 | -1.73012500 | -0.99647500 |
| C    | 3.39992400  | 0.65187700  | -0.35746200 |
| C    | 3.47453400  | 1.62509200  | -1.37162200 |
| C    | 3.48624100  | 2.96733500  | -0.98781900 |
| H    | 3.51377900  | 3.72571000  | -1.76761800 |
| C    | 3.44049100  | 3.36612700  | 0.34652300  |
| C    | 3.43645700  | 2.37695000  | 1.32566400  |
| H    | 3.42867800  | 2.67605300  | 2.37040100  |
| C    | 3.41377400  | 1.02083200  | 0.99942700  |
| C    | 3.16489000  | -0.77170200 | -0.73380300 |
| C    | 4.20847000  | -1.66295600 | -1.04555900 |
| H    | 5.23252800  | -1.32921700 | -0.92139300 |
| C    | 3.93074800  | -2.92355600 | -1.52882800 |
| H    | 4.73075900  | -3.61242600 | -1.78197000 |
| C    | 2.58767200  | -3.30065600 | -1.71700800 |
| C    | 2.16357900  | -4.56251100 | -2.25825800 |
| H    | 2.92049600  | -5.28018700 | -2.55913800 |
| C    | 0.84412700  | -4.84958700 | -2.39866400 |
| H    | 0.52805100  | -5.79988500 | -2.81820700 |
| C    | -0.16974200 | -3.91283600 | -1.99547600 |
| C    | -1.55008400 | -4.14490000 | -2.12492200 |

|   |             |             |             |
|---|-------------|-------------|-------------|
| H | -1.91358300 | -5.07093600 | -2.55960600 |
| C | -2.42296900 | -3.17171600 | -1.70074100 |
| H | -3.49280500 | -3.30651500 | -1.80807300 |
| C | -1.95574600 | -1.97097500 | -1.12451100 |
| C | 0.21972500  | -2.68386100 | -1.44185600 |
| C | 1.60821900  | -2.37305800 | -1.32649000 |
| C | -2.95200900 | -0.94683600 | -0.69195600 |
| C | -3.60975000 | -1.08361500 | 0.54456100  |
| C | -4.57104800 | -0.13463600 | 0.88552400  |
| H | -5.08508100 | -0.21814900 | 1.84033500  |
| C | -4.90887800 | 0.92150800  | 0.03941300  |
| C | -4.25214900 | 1.01924700  | -1.18491800 |
| H | -4.50547800 | 1.82811200  | -1.86168200 |
| C | -3.27493800 | 0.10079600  | -1.57130200 |
| C | -3.33369400 | -2.25753400 | 1.47797900  |
| H | -2.32763700 | -2.63165600 | 1.26016000  |
| C | -2.65706900 | 0.16959100  | -2.96357900 |
| H | -1.67283500 | -0.30716400 | -2.91667900 |
| C | 3.62077100  | 1.35487800  | -2.87229600 |
| H | 3.29943400  | 2.28469800  | -3.35765100 |
| C | 3.46868500  | -0.03829500 | 2.08908700  |
| H | 2.97751300  | -0.93504700 | 1.70362100  |
| C | 3.35329300  | 4.83336600  | 0.72507400  |
| H | 3.45381400  | 4.89558600  | 1.81630100  |
| C | -6.01680400 | 1.87573400  | 0.45781100  |
| C | -0.65617600 | -0.20891400 | 1.58434100  |
| H | -1.43072400 | 0.36405700  | 2.07099300  |
| C | 0.20614300  | -1.14590800 | 1.64097100  |
| C | -0.40715000 | 1.63501100  | -0.24764800 |
| C | 0.28717400  | 1.35668400  | -1.29945500 |
| H | 0.68418600  | 1.85976700  | -2.17357100 |
| C | -1.04986700 | 2.71228300  | 0.49325900  |
| C | -1.96574200 | 3.58420900  | -0.11379200 |
| C | -0.70352600 | 2.94891700  | 1.83364900  |
| C | -2.50173300 | 4.65980100  | 0.58835900  |
| H | -2.25359100 | 3.41745200  | -1.14637000 |
| C | -1.24116200 | 4.02368900  | 2.53590400  |
| H | 0.01683700  | 2.29119700  | 2.31133700  |
| C | -2.14506400 | 4.88479400  | 1.91697500  |
| H | -3.19622100 | 5.33210100  | 0.09168000  |
| H | -0.94954800 | 4.19110800  | 3.56899300  |
| C | 0.68670000  | -2.23599800 | 2.47529200  |
| C | 0.17610200  | -2.39585300 | 3.77651700  |
| C | 1.65751800  | -3.14825200 | 2.03731100  |

|   |             |             |             |
|---|-------------|-------------|-------------|
| C | 0.61527400  | -3.42488800 | 4.60057700  |
| H | -0.56937100 | -1.69192700 | 4.13407000  |
| C | 2.10042100  | -4.17881200 | 2.86235700  |
| H | 2.07671300  | -3.04264300 | 1.04349200  |
| C | 1.58104100  | -4.32427900 | 4.14645700  |
| H | 0.20401200  | -3.52693000 | 5.60115200  |
| H | 2.85454000  | -4.87120900 | 2.49853800  |
| C | 5.10855300  | 1.16846200  | -3.21554800 |
| H | 5.24402700  | 1.08570900  | -4.30004800 |
| H | 5.70711300  | 2.01190700  | -2.85593600 |
| H | 5.50106500  | 0.25344000  | -2.75760600 |
| C | 2.78881700  | 0.23404300  | -3.51758600 |
| H | 3.22644600  | -0.75462100 | -3.35094900 |
| H | 1.76035000  | 0.21658600  | -3.15121400 |
| H | 2.76838300  | 0.39657900  | -4.60111100 |
| C | 4.92989300  | -0.40371400 | 2.39386700  |
| H | 5.47135500  | 0.46590600  | 2.78524900  |
| H | 4.97488000  | -1.20125700 | 3.14422300  |
| H | 5.45268000  | -0.75051800 | 1.49619300  |
| C | 2.73549700  | 0.34878800  | 3.37527200  |
| H | 2.69845900  | -0.51443500 | 4.04845200  |
| H | 3.24116900  | 1.16246800  | 3.90805200  |
| H | 1.70562100  | 0.64937900  | 3.16185200  |
| C | 4.48215500  | 5.66772400  | 0.10684100  |
| H | 4.43851500  | 6.69841500  | 0.47585100  |
| H | 5.46414300  | 5.25345600  | 0.35844700  |
| H | 4.39928900  | 5.70408200  | -0.98554500 |
| C | 1.97579200  | 5.40059900  | 0.34927700  |
| H | 1.81981400  | 5.34986000  | -0.73501600 |
| H | 1.17093900  | 4.83555800  | 0.83154700  |
| H | 1.89284800  | 6.45010600  | 0.65435000  |
| C | -2.42945300 | 1.58983500  | -3.48774700 |
| H | -1.91737000 | 1.54420900  | -4.45539800 |
| H | -3.37069500 | 2.12899200  | -3.64456400 |
| H | -1.80283200 | 2.16393900  | -2.80137000 |
| C | -3.52735000 | -0.61989900 | -3.95585800 |
| H | -3.66378700 | -1.65887000 | -3.63980300 |
| H | -4.51935000 | -0.16028900 | -4.04161600 |
| H | -3.06725400 | -0.62554500 | -4.95056200 |
| C | -7.38872000 | 1.22298900  | 0.22372100  |
| H | -8.19396700 | 1.87855600  | 0.57436600  |
| H | -7.54277000 | 1.03498000  | -0.84569200 |
| H | -7.47027500 | 0.26634800  | 0.75033300  |
| C | -4.34094200 | -3.39298100 | 1.23093900  |

|   |             |             |             |
|---|-------------|-------------|-------------|
| H | -5.36253800 | -3.04331100 | 1.42191900  |
| H | -4.29990500 | -3.76547400 | 0.20378300  |
| H | -4.13845500 | -4.23457600 | 1.90322800  |
| C | -3.36076500 | -1.88201600 | 2.96476100  |
| H | -2.73284400 | -1.01268800 | 3.17396400  |
| H | -4.37779400 | -1.66246500 | 3.30930900  |
| H | -2.98768500 | -2.72129700 | 3.56145000  |
| C | -5.95231500 | 3.24424200  | -0.22324600 |
| H | -4.96547000 | 3.70091000  | -0.10310600 |
| H | -6.16798600 | 3.16978200  | -1.29561000 |
| H | -6.69844600 | 3.91634700  | 0.21404000  |
| H | -5.90690000 | 2.03724800  | 1.53861600  |
| H | -2.56416200 | 5.72578800  | 2.46135200  |
| H | 1.92628100  | -5.12791900 | 4.79026700  |

<sup>T</sup>In1

| ATOM | X           | Y           | Z           |
|------|-------------|-------------|-------------|
| Fe   | -0.23201300 | 0.01971600  | -0.10788500 |
| N    | 0.87083600  | -1.66060200 | -1.05385400 |
| N    | -1.77965500 | -1.20003700 | -1.08429200 |
| C    | 3.09315800  | -0.77276800 | -0.52758800 |
| C    | 3.56293600  | 0.21735900  | -1.40674000 |
| C    | 4.47668700  | 1.15722200  | -0.92860400 |
| H    | 4.83116100  | 1.92835300  | -1.60372100 |
| C    | 4.92373100  | 1.14545500  | 0.38846000  |
| C    | 4.43478900  | 0.15432100  | 1.23862400  |
| H    | 4.77095400  | 0.14667200  | 2.27298000  |
| C    | 3.52305000  | -0.80768200 | 0.81003300  |
| C    | 2.18821100  | -1.84071400 | -1.05770100 |
| C    | 2.76880300  | -3.01109300 | -1.59387800 |
| H    | 3.84652000  | -3.12480500 | -1.55595700 |
| C    | 1.97522900  | -3.97980800 | -2.15743400 |
| H    | 2.40814500  | -4.88502200 | -2.57275100 |
| C    | 0.58301800  | -3.78055100 | -2.20732900 |
| C    | -0.31989400 | -4.72599400 | -2.80110800 |
| H    | 0.09186000  | -5.63378500 | -3.23182500 |
| C    | -1.65411400 | -4.48893500 | -2.82547700 |
| H    | -2.33773500 | -5.20253200 | -3.27553500 |
| C    | -2.19707900 | -3.28856500 | -2.25436500 |
| C    | -3.57288800 | -2.99421200 | -2.26004100 |
| H    | -4.27372900 | -3.68668900 | -2.71679200 |
| C    | -4.00887600 | -1.82643000 | -1.68322200 |
| H    | -5.06151600 | -1.56705800 | -1.67818500 |
| C    | -3.08494600 | -0.94234000 | -1.08676100 |

|   |             |             |             |
|---|-------------|-------------|-------------|
| C | -1.33925500 | -2.34550900 | -1.65625400 |
| C | 0.08248500  | -2.59461200 | -1.63681900 |
| C | -3.57855800 | 0.31587500  | -0.44541900 |
| C | -4.02167300 | 0.28761400  | 0.88751300  |
| C | -4.49139500 | 1.47383900  | 1.45491500  |
| H | -4.83107500 | 1.47327100  | 2.48710000  |
| C | -4.52573700 | 2.67001700  | 0.74535300  |
| C | -4.09053400 | 2.66458100  | -0.57974900 |
| H | -4.11610000 | 3.59140500  | -1.14569800 |
| C | -3.61659400 | 1.50758900  | -1.19391400 |
| C | -4.02480000 | -0.99969800 | 1.70244100  |
| H | -3.23487000 | -1.64894800 | 1.30774200  |
| C | -3.19867100 | 1.53354400  | -2.65784700 |
| H | -2.44324500 | 0.75360300  | -2.79907600 |
| C | 3.12257800  | 0.26000400  | -2.86426400 |
| H | 2.13529600  | -0.21017300 | -2.92659400 |
| C | 3.03343600  | -1.88318200 | 1.76859100  |
| H | 2.09054000  | -2.27807300 | 1.37674400  |
| C | 5.92517700  | 2.15444700  | 0.92715700  |
| H | 5.56568400  | 2.45275100  | 1.92148300  |
| C | -5.01104900 | 3.94938700  | 1.40268100  |
| H | -5.30580000 | 3.69754900  | 2.42956400  |
| C | -0.64548700 | 0.45424300  | 1.71794900  |
| H | -0.84104900 | 1.30617000  | 2.35566400  |
| C | -0.47438700 | -0.81883600 | 1.65976700  |
| C | 0.61757000  | 1.70679400  | -0.51966700 |
| C | 0.04974800  | 1.27092000  | -1.58463300 |
| H | -0.09339300 | 1.45167600  | -2.64088400 |
| C | 1.37034000  | 2.77419400  | 0.12251100  |
| C | 1.53710500  | 4.01443800  | -0.51285500 |
| C | 1.95324800  | 2.58435800  | 1.38107200  |
| C | 2.26654400  | 5.03224300  | 0.09367400  |
| H | 1.08232500  | 4.17209600  | -1.48746400 |
| C | 2.68571200  | 3.59951300  | 1.98702100  |
| H | 1.83392600  | 1.62224900  | 1.86795200  |
| C | 2.84352400  | 4.82805800  | 1.34743800  |
| H | 2.38455700  | 5.98743300  | -0.41028300 |
| H | 3.13861500  | 3.43118700  | 2.96016100  |
| C | -0.50716400 | -2.04711700 | 2.44226800  |
| C | -0.59931500 | -1.99931500 | 3.84289300  |
| C | -0.43798800 | -3.30368800 | 1.82746700  |
| C | -0.61851600 | -3.16510500 | 4.59923400  |
| H | -0.64820100 | -1.03067900 | 4.33171700  |
| C | -0.45744700 | -4.47364000 | 2.58221600  |

|   |             |             |             |
|---|-------------|-------------|-------------|
| H | -0.36116300 | -3.35757600 | 0.74749200  |
| C | -0.54646300 | -4.40909700 | 3.97099100  |
| H | -0.68903000 | -3.10481800 | 5.68168700  |
| H | -0.39959000 | -5.43727400 | 2.08412300  |
| C | -5.36876600 | -1.73155100 | 1.55681200  |
| H | -6.18592500 | -1.10456800 | 1.93315900  |
| H | -5.58859800 | -1.98099200 | 0.51490900  |
| H | -5.36119300 | -2.66357000 | 2.13355500  |
| C | -3.72077900 | -0.77634100 | 3.18761600  |
| H | -2.82315700 | -0.16620500 | 3.31848400  |
| H | -4.55546500 | -0.28714800 | 3.70309200  |
| H | -3.55034100 | -1.73986600 | 3.67846100  |
| C | -2.56462500 | 2.86208200  | -3.08724000 |
| H | -2.10452300 | 2.75016200  | -4.07530000 |
| H | -3.31085000 | 3.66112600  | -3.16527600 |
| H | -1.79068500 | 3.18094400  | -2.38239800 |
| C | -4.39720800 | 1.20805000  | -3.56348300 |
| H | -4.82528100 | 0.22716200  | -3.33471800 |
| H | -5.18578500 | 1.95942800  | -3.43640600 |
| H | -4.09402300 | 1.20784400  | -4.61684000 |
| C | -6.24463800 | 4.52244700  | 0.69242600  |
| H | -6.00881700 | 4.81196100  | -0.33835800 |
| H | -7.05541100 | 3.78708500  | 0.65891600  |
| H | -6.60964900 | 5.41366700  | 1.21491300  |
| C | -3.88733200 | 4.99194800  | 1.48584200  |
| H | -4.22952500 | 5.88549000  | 2.01989700  |
| H | -3.01525000 | 4.58835300  | 2.01111500  |
| H | -3.56367600 | 5.30200300  | 0.48527600  |
| C | 4.03599200  | -3.04461500 | 1.84128400  |
| H | 5.00141400  | -2.69608600 | 2.22785000  |
| H | 3.66375400  | -3.82930700 | 2.50997400  |
| H | 4.20830200  | -3.49146200 | 0.85662100  |
| C | 2.73893100  | -1.34647600 | 3.17266900  |
| H | 2.28091800  | -2.13344100 | 3.78048000  |
| H | 3.65101600  | -1.02015400 | 3.68517200  |
| H | 2.03959700  | -0.50524900 | 3.13297000  |
| C | 4.09224300  | -0.53999900 | -3.74854400 |
| H | 3.76538200  | -0.51894300 | -4.79467500 |
| H | 5.09806500  | -0.10606800 | -3.69766000 |
| H | 4.16005200  | -1.58651100 | -3.43572900 |
| C | 2.97086400  | 1.68439200  | -3.41149700 |
| H | 2.47317400  | 1.65330200  | -4.38716100 |
| H | 2.37331600  | 2.30485900  | -2.73839500 |
| H | 3.94270400  | 2.16956500  | -3.55869900 |

|   |             |             |             |
|---|-------------|-------------|-------------|
| C | 7.30198400  | 1.49512700  | 1.10589100  |
| H | 8.01783500  | 2.20330200  | 1.53884100  |
| H | 7.24490200  | 0.62136800  | 1.76368600  |
| H | 7.69479900  | 1.16332700  | 0.13708200  |
| C | 6.04602100  | 3.42514500  | 0.08387500  |
| H | 6.50779900  | 3.21926300  | -0.88929600 |
| H | 5.06801000  | 3.88578000  | -0.08738700 |
| H | 6.68162800  | 4.15365600  | 0.59893300  |
| H | -0.55920200 | -5.32104200 | 4.56085100  |
| H | 3.41405000  | 5.62184800  | 1.82095200  |

<sup>Q</sup>In1

| ATOM | X           | Y           | Z           |
|------|-------------|-------------|-------------|
| Fe   | -0.20303300 | -0.17176900 | -0.15006300 |
| N    | 0.96253100  | -1.71008300 | -0.98112400 |
| N    | -1.73200200 | -1.34561800 | -0.99616900 |
| C    | 3.13025300  | -0.70313400 | -0.51990600 |
| C    | 3.49577400  | 0.33436800  | -1.39898700 |
| C    | 4.32257400  | 1.35580000  | -0.92931900 |
| H    | 4.60633600  | 2.15219200  | -1.60918200 |
| C    | 4.78461200  | 1.38423500  | 0.38339700  |
| C    | 4.39034100  | 0.35707900  | 1.23950800  |
| H    | 4.74275000  | 0.37793800  | 2.26804100  |
| C    | 3.56675900  | -0.68743500 | 0.81745400  |
| C    | 2.30174000  | -1.84125900 | -1.03673500 |
| C    | 2.91155000  | -2.95794400 | -1.58831100 |
| H    | 3.99369800  | -3.02092400 | -1.60334200 |
| C    | 2.11682200  | -3.98843800 | -2.13642700 |
| H    | 2.58130000  | -4.87263500 | -2.56423000 |
| C    | 0.74140800  | -3.85614200 | -2.14736600 |
| C    | -0.15767300 | -4.83944000 | -2.71076400 |
| H    | 0.27545600  | -5.73773500 | -3.14333400 |
| C    | -1.49872800 | -4.65845200 | -2.71052300 |
| H    | -2.15623600 | -5.40975000 | -3.14052300 |
| C    | -2.09753000 | -3.47249900 | -2.14470300 |
| C    | -3.45880100 | -3.22949000 | -2.12248700 |
| H    | -4.14510100 | -3.95535500 | -2.55061200 |
| C    | -3.95085600 | -2.04249300 | -1.54828900 |
| H    | -5.01338800 | -1.83078500 | -1.53050200 |
| C    | -3.05719500 | -1.13186600 | -0.99606000 |
| C    | -1.22314400 | -2.49324400 | -1.57232000 |
| C    | 0.16548700  | -2.68037800 | -1.56866400 |
| C    | -3.49237600 | 0.16266500  | -0.37807400 |
| C    | -3.74033000 | 0.23466700  | 1.00490500  |

|   |             |             |             |
|---|-------------|-------------|-------------|
| C | -4.00586200 | 1.48367700  | 1.57051100  |
| H | -4.18371100 | 1.55938100  | 2.63947600  |
| C | -4.02691700 | 2.64951800  | 0.81050500  |
| C | -3.82013500 | 2.54496600  | -0.56470500 |
| H | -3.85074100 | 3.44576200  | -1.17104600 |
| C | -3.55856500 | 1.32142300  | -1.17806400 |
| C | -3.76840800 | -1.02128500 | 1.86667900  |
| H | -3.02658700 | -1.72028400 | 1.46341600  |
| C | -3.41378000 | 1.24089000  | -2.69213400 |
| H | -2.75986300 | 0.39215000  | -2.92157200 |
| C | 3.05260500  | 0.33264500  | -2.85653800 |
| H | 2.11781000  | -0.23473600 | -2.91765200 |
| C | 3.19867200  | -1.80837100 | 1.77865200  |
| H | 2.26949200  | -2.26341000 | 1.41952600  |
| C | 5.72703600  | 2.46224200  | 0.89267800  |
| H | 5.50050100  | 2.60989400  | 1.95726200  |
| C | -4.24609800 | 4.00065600  | 1.46720500  |
| H | -4.43403400 | 3.81956600  | 2.53330400  |
| C | -0.31490400 | 0.38907900  | 1.74181100  |
| H | -0.38457900 | 1.34967900  | 2.22558400  |
| C | -0.29541300 | -0.87652800 | 1.74345000  |
| C | 0.22829800  | 1.70568700  | -0.77545800 |
| C | -0.16432800 | 1.02192400  | -1.75466600 |
| H | -0.37598500 | 0.84124800  | -2.79327600 |
| C | 0.68475600  | 2.90894200  | -0.10936400 |
| C | 0.14504200  | 4.15081200  | -0.46878300 |
| C | 1.65868400  | 2.84485200  | 0.89416300  |
| C | 0.57282000  | 5.30975500  | 0.17093000  |
| H | -0.61803200 | 4.19884600  | -1.23971200 |
| C | 2.09163800  | 4.00767400  | 1.52128300  |
| H | 2.07811900  | 1.88143700  | 1.16722400  |
| C | 1.54814400  | 5.24150600  | 1.16455600  |
| H | 0.14127400  | 6.26683000  | -0.10586700 |
| H | 2.85429300  | 3.94916500  | 2.29221700  |
| C | -0.33626900 | -2.13716300 | 2.46160900  |
| C | -0.29367000 | -2.12941800 | 3.86431900  |
| C | -0.42702400 | -3.36154900 | 1.79107000  |
| C | -0.33653900 | -3.32098600 | 4.57719700  |
| H | -0.22018300 | -1.18008300 | 4.38568000  |
| C | -0.47182800 | -4.55366400 | 2.50746800  |
| H | -0.46457600 | -3.37376200 | 0.70813500  |
| C | -0.42495800 | -4.53724200 | 3.89967500  |
| H | -0.29961500 | -3.30200400 | 5.66229400  |
| H | -0.54314900 | -5.49768800 | 1.97583700  |

|   |             |             |             |
|---|-------------|-------------|-------------|
| C | -5.14796200 | -1.69530000 | 1.77942600  |
| H | -5.92544000 | -1.01984500 | 2.15620500  |
| H | -5.39931900 | -1.96512500 | 0.75046100  |
| H | -5.16599600 | -2.60834000 | 2.38579900  |
| C | -3.41553300 | -0.77347900 | 3.33676800  |
| H | -2.49411600 | -0.19295200 | 3.43809800  |
| H | -4.21894600 | -0.24211800 | 3.86052300  |
| H | -3.26885000 | -1.73171100 | 3.84556900  |
| C | -2.79559300 | 2.49232500  | -3.32672300 |
| H | -2.55983000 | 2.29617100  | -4.37831200 |
| H | -3.48888200 | 3.34071500  | -3.30380700 |
| H | -1.87430300 | 2.79217400  | -2.81865600 |
| C | -4.78146000 | 0.95879100  | -3.33571800 |
| H | -5.21654800 | 0.02945300  | -2.95741200 |
| H | -5.48029200 | 1.77550000  | -3.11891100 |
| H | -4.68280100 | 0.87198300  | -4.42380800 |
| C | -5.47005300 | 4.72775900  | 0.89545800  |
| H | -5.33156300 | 4.96017500  | -0.16679100 |
| H | -6.37376800 | 4.11693400  | 0.99244200  |
| H | -5.63591100 | 5.67329300  | 1.42368700  |
| C | -2.98644500 | 4.87155900  | 1.35728800  |
| H | -3.12469500 | 5.82124100  | 1.88649200  |
| H | -2.11362600 | 4.36316200  | 1.78032900  |
| H | -2.76055300 | 5.09991900  | 0.30905000  |
| C | 4.28281600  | -2.89660500 | 1.77868600  |
| H | 5.24193100  | -2.48369300 | 2.11419900  |
| H | 4.00610600  | -3.71156600 | 2.45752400  |
| H | 4.42231300  | -3.31778100 | 0.77844400  |
| C | 2.94178900  | -1.31578300 | 3.20634700  |
| H | 2.53949300  | -2.13342900 | 3.81271600  |
| H | 3.86188400  | -0.96912300 | 3.69038700  |
| H | 2.21547600  | -0.49633600 | 3.21788800  |
| C | 4.09502400  | -0.37693100 | -3.73505100 |
| H | 3.77089000  | -0.38871100 | -4.78224000 |
| H | 5.05764300  | 0.14600100  | -3.68267300 |
| H | 4.24923900  | -1.41098100 | -3.41362000 |
| C | 2.77304800  | 1.73572300  | -3.41109300 |
| H | 2.27170600  | 1.65461800  | -4.38190800 |
| H | 2.13200800  | 2.31599800  | -2.74101700 |
| H | 3.69942100  | 2.29914900  | -3.57214300 |
| C | 7.18128900  | 1.97466100  | 0.79079500  |
| H | 7.87245800  | 2.72008600  | 1.20053900  |
| H | 7.32371000  | 1.03563700  | 1.33600400  |
| H | 7.44933400  | 1.80042700  | -0.25826600 |

|   |             |             |             |
|---|-------------|-------------|-------------|
| C | 5.56362400  | 3.81433000  | 0.19217400  |
| H | 5.90750300  | 3.77204400  | -0.84788400 |
| H | 4.51934300  | 4.14326700  | 0.19388400  |
| H | 6.16490700  | 4.57433600  | 0.70268300  |
| H | -0.45778800 | -5.46902600 | 4.45637400  |
| H | 1.88241000  | 6.14726900  | 1.66128900  |

<sup>s</sup>In6

| ATOM | X           | Y           | Z           |
|------|-------------|-------------|-------------|
| Fe   | 0.26395400  | -0.40699800 | 0.48891500  |
| N    | 1.88047000  | -1.58447800 | 0.06994900  |
| N    | -0.68991500 | -2.01894000 | -0.14693200 |
| C    | 3.61520600  | 0.11905800  | 0.09056500  |
| C    | 3.94679800  | 0.71633000  | -1.14284200 |
| C    | 4.26218700  | 2.07575900  | -1.14319600 |
| H    | 4.49029000  | 2.55091300  | -2.09511400 |
| C    | 4.27553900  | 2.84500100  | 0.02042800  |
| C    | 3.98846500  | 2.21184700  | 1.22410900  |
| H    | 4.01346300  | 2.79281800  | 2.14288000  |
| C    | 3.65320300  | 0.85825100  | 1.28198200  |
| C    | 3.18423200  | -1.30767400 | 0.11869700  |
| C    | 4.14986600  | -2.33567100 | 0.13429400  |
| H    | 5.19320900  | -2.06042500 | 0.23768200  |
| C    | 3.77638500  | -3.65152900 | -0.00180300 |
| H    | 4.51691400  | -4.44522000 | -0.00472300 |
| C    | 2.41141000  | -3.95421200 | -0.16473600 |
| C    | 1.90040000  | -5.27777700 | -0.39173400 |
| H    | 2.60477300  | -6.10275300 | -0.43290800 |
| C    | 0.57151000  | -5.49286100 | -0.56768200 |
| H    | 0.19184500  | -6.49230000 | -0.75545900 |
| C    | -0.36490500 | -4.40494300 | -0.51258600 |
| C    | -1.75112200 | -4.54059200 | -0.72018500 |
| H    | -2.17879900 | -5.51655100 | -0.92784200 |
| C    | -2.54327200 | -3.41890100 | -0.68089300 |
| H    | -3.60733600 | -3.48467000 | -0.87566700 |
| C    | -1.99459800 | -2.14925000 | -0.39066700 |
| C    | 0.10991400  | -3.11426700 | -0.24546300 |
| C    | 1.51118900  | -2.88012800 | -0.09342900 |
| C    | -2.88495500 | -0.95209100 | -0.42348800 |
| C    | -3.85018200 | -0.76697800 | 0.57623700  |
| C    | -4.75175500 | 0.29416200  | 0.45009600  |
| H    | -5.49943300 | 0.43337900  | 1.22485100  |
| C    | -4.70473200 | 1.17545000  | -0.62193000 |
| C    | -3.72467400 | 0.97178700  | -1.59610900 |

|   |             |             |             |
|---|-------------|-------------|-------------|
| H | -3.67741400 | 1.66581800  | -2.43093400 |
| C | -2.81606200 | -0.07767400 | -1.53075400 |
| C | -3.96954600 | -1.69426500 | 1.77879500  |
| H | -3.10961400 | -2.37178200 | 1.77767700  |
| C | -1.83436900 | -0.31807600 | -2.67255200 |
| H | -0.92112500 | -0.74461500 | -2.24825100 |
| C | 4.01769100  | 0.01017900  | -2.50049200 |
| H | 3.94136100  | 0.81836500  | -3.23806500 |
| C | 3.38375700  | 0.20356000  | 2.62693000  |
| H | 2.89909000  | -0.76039100 | 2.45323800  |
| C | 4.55272100  | 4.33616300  | -0.02777900 |
| H | 4.59130000  | 4.69458300  | 1.00873300  |
| C | -5.68449900 | 2.32489900  | -0.79839100 |
| H | -5.08849400 | 3.20324200  | -1.08148200 |
| C | -0.25626600 | 1.37992600  | 0.03121500  |
| C | 0.74945200  | 1.03377500  | -0.68481300 |
| H | 1.47682200  | 1.34944400  | -1.41566000 |
| C | -1.22059500 | 2.41883100  | 0.35728600  |
| C | -1.27487300 | 3.58623100  | -0.42003900 |
| C | -2.10663300 | 2.27452500  | 1.42885900  |
| C | -2.20634600 | 4.57920500  | -0.13947900 |
| H | -0.58094700 | 3.70323500  | -1.24807900 |
| C | -3.02886900 | 3.27537700  | 1.71627300  |
| H | -2.06308500 | 1.36666400  | 2.01759100  |
| C | -3.08791500 | 4.42492900  | 0.93129400  |
| H | -2.24357600 | 5.47562900  | -0.75186700 |
| H | -3.71234300 | 3.15179900  | 2.55169600  |
| C | 5.39828000  | -0.63431200 | -2.70564400 |
| H | 5.48947000  | -1.02009900 | -3.72742200 |
| H | 6.20011300  | 0.09255900  | -2.53916500 |
| H | 5.54851600  | -1.47265600 | -2.01756300 |
| C | 2.90082100  | -0.98504500 | -2.85600400 |
| H | 3.05283900  | -1.96507300 | -2.39409900 |
| H | 1.91175000  | -0.62111000 | -2.56328300 |
| H | 2.90152300  | -1.13979900 | -3.94060300 |
| C | 4.70965200  | -0.06641700 | 3.35353600  |
| H | 5.24008200  | 0.87137200  | 3.55833700  |
| H | 4.52827600  | -0.57075400 | 4.30928700  |
| H | 5.36783900  | -0.70196900 | 2.75045700  |
| C | 2.42860600  | 1.01790900  | 3.50674500  |
| H | 2.16063400  | 0.43690700  | 4.39533500  |
| H | 2.88121300  | 1.95662600  | 3.84612800  |
| H | 1.50478000  | 1.25700800  | 2.96912500  |
| C | 5.90227400  | 4.65821700  | -0.68168000 |

|   |             |             |             |
|---|-------------|-------------|-------------|
| H | 6.10052900  | 5.73462500  | -0.63329000 |
| H | 6.72135000  | 4.13567300  | -0.17636400 |
| H | 5.91423800  | 4.36591700  | -1.73807300 |
| C | 3.40527800  | 5.07362800  | -0.73398200 |
| H | 3.32753000  | 4.76151400  | -1.78226900 |
| H | 2.44592300  | 4.86506600  | -0.24818900 |
| H | 3.57297200  | 6.15634200  | -0.71561100 |
| C | -1.41655400 | 0.95887800  | -3.40772100 |
| H | -0.58401800 | 0.73591200  | -4.08406900 |
| H | -2.23147900 | 1.36583700  | -4.01752300 |
| H | -1.09085100 | 1.73050300  | -2.70471900 |
| C | -2.41718400 | -1.33326500 | -3.66952200 |
| H | -2.65652700 | -2.28601900 | -3.18599700 |
| H | -3.33703800 | -0.94125500 | -4.11958200 |
| H | -1.70064700 | -1.53316500 | -4.47443700 |
| C | -6.65457600 | 2.02102000  | -1.95190800 |
| H | -7.33432200 | 2.86424900  | -2.11933000 |
| H | -6.11976700 | 1.82394100  | -2.88676200 |
| H | -7.25963900 | 1.13708500  | -1.71630300 |
| C | -6.46593700 | 2.68722000  | 0.46515900  |
| H | -7.16152800 | 1.88899900  | 0.75071600  |
| H | -5.79638300 | 2.87778100  | 1.30933200  |
| H | -7.05817500 | 3.59153500  | 0.28943000  |
| C | -5.24466000 | -2.54580100 | 1.68584500  |
| H | -6.13911400 | -1.91289800 | 1.72755800  |
| H | -5.28464400 | -3.11540800 | 0.75119900  |
| H | -5.29379100 | -3.25524700 | 2.51942800  |
| C | -3.92626700 | -0.93390800 | 3.11065800  |
| H | -2.98454000 | -0.38899300 | 3.20672200  |
| H | -4.75777500 | -0.22608500 | 3.20314200  |
| H | -4.00001400 | -1.64190800 | 3.94428800  |
| C | 0.25662300  | -1.17324900 | 2.20633000  |
| O | 0.82080800  | -1.93978300 | 2.96700700  |
| O | -0.81778200 | -0.51224700 | 2.19721900  |
| H | -3.81779900 | 5.19853600  | 1.15217000  |

<sup>T</sup>In6

| ATOM | X           | Y           | Z           |
|------|-------------|-------------|-------------|
| Fe   | 0.07057900  | 0.36718100  | 0.03080800  |
| N    | 1.47289800  | -1.10600300 | -0.79972100 |
| N    | -1.18126300 | -0.92052000 | -1.25130100 |
| C    | 3.42070400  | 0.06094000  | -0.00228700 |
| C    | 3.95960800  | 1.02718100  | -0.87573300 |
| C    | 4.40986300  | 2.22746300  | -0.31865300 |

|   |             |             |             |
|---|-------------|-------------|-------------|
| H | 4.80677000  | 2.98667900  | -0.98971000 |
| C | 4.36956800  | 2.48247700  | 1.04862100  |
| C | 3.89727400  | 1.47732000  | 1.88878700  |
| H | 3.89259800  | 1.65569900  | 2.96001400  |
| C | 3.42193000  | 0.26490400  | 1.39135900  |
| C | 2.78466000  | -1.16192000 | -0.57481400 |
| C | 3.54363500  | -2.29381200 | -0.93276100 |
| H | 4.59976600  | -2.31908300 | -0.69042300 |
| C | 2.95045800  | -3.32626800 | -1.61865200 |
| H | 3.52362800  | -4.19907400 | -1.91646600 |
| C | 1.59039500  | -3.22722700 | -1.96998200 |
| C | 0.90945700  | -4.21961900 | -2.75315800 |
| H | 1.47165500  | -5.08097400 | -3.10025600 |
| C | -0.40321900 | -4.07857000 | -3.06029200 |
| H | -0.91604400 | -4.82336500 | -3.66109200 |
| C | -1.15398900 | -2.95140000 | -2.58277200 |
| C | -2.52572100 | -2.77630900 | -2.84653200 |
| H | -3.05383100 | -3.49299200 | -3.46822300 |
| C | -3.18267800 | -1.70364000 | -2.29532400 |
| H | -4.24110800 | -1.54843500 | -2.46999500 |
| C | -2.48810500 | -0.79477900 | -1.46911500 |
| C | -0.52240100 | -1.97171900 | -1.79502000 |
| C | 0.88803200  | -2.09644600 | -1.51168800 |
| C | -3.23764400 | 0.30696000  | -0.78863800 |
| C | -3.83970500 | 0.05244300  | 0.46022800  |
| C | -4.54636300 | 1.08181700  | 1.07684200  |
| H | -5.00418800 | 0.90032700  | 2.04493200  |
| C | -4.67320500 | 2.34361700  | 0.49615100  |
| C | -4.08469800 | 2.55897400  | -0.74560300 |
| H | -4.18786900 | 3.53667000  | -1.20805200 |
| C | -3.36672100 | 1.56064400  | -1.40804700 |
| C | -3.76158000 | -1.31800400 | 1.12211500  |
| H | -2.83300200 | -1.79851200 | 0.79466300  |
| C | -2.79387900 | 1.82520900  | -2.79350600 |
| H | -1.93684100 | 1.16032100  | -2.93967200 |
| C | 4.23235600  | 0.86011100  | -2.37550800 |
| H | 4.26259100  | 1.88282300  | -2.77063800 |
| C | 2.99108300  | -0.84436000 | 2.34107700  |
| H | 2.18822800  | -1.40924400 | 1.85637900  |
| C | 4.82300400  | 3.81598000  | 1.61412200  |
| H | 4.71811200  | 3.75780400  | 2.70502300  |
| C | -5.41441700 | 3.46041800  | 1.20851000  |
| H | -5.40184500 | 4.33507600  | 0.54562000  |
| C | -0.71513000 | 0.61542700  | 1.80026500  |

|   |             |             |             |
|---|-------------|-------------|-------------|
| H | -1.12652500 | 1.43013200  | 2.37713100  |
| C | -0.39867200 | -0.61619000 | 1.71159900  |
| C | -0.38626900 | -1.91623300 | 2.36581300  |
| C | -0.55645200 | -1.99725200 | 3.75718600  |
| C | -0.21421400 | -3.10288200 | 1.64460900  |
| C | -0.55107300 | -3.22735100 | 4.40324900  |
| H | -0.69083300 | -1.08024500 | 4.32285000  |
| C | -0.21673300 | -4.33615000 | 2.28961200  |
| H | -0.08351100 | -3.05663700 | 0.57086400  |
| C | -0.38240400 | -4.40297500 | 3.67079600  |
| H | -0.68280900 | -3.27159800 | 5.48041800  |
| H | -0.08556200 | -5.24616200 | 1.71163400  |
| C | 5.64305300  | 0.27237000  | -2.56024600 |
| H | 5.90867800  | 0.24788300  | -3.62325700 |
| H | 6.39478200  | 0.86593100  | -2.02963300 |
| H | 5.69039400  | -0.75377700 | -2.17799700 |
| C | 3.23081800  | 0.10289800  | -3.25850800 |
| H | 3.30423100  | -0.98113700 | -3.14142700 |
| H | 2.20166300  | 0.41333400  | -3.07485500 |
| H | 3.46527000  | 0.32403100  | -4.30632600 |
| C | 4.16002300  | -1.81155100 | 2.59173000  |
| H | 4.99498100  | -1.28783100 | 3.07232500  |
| H | 3.84256200  | -2.62667800 | 3.25174400  |
| H | 4.53140000  | -2.25420700 | 1.66257900  |
| C | 2.44546300  | -0.33795000 | 3.67822400  |
| H | 2.03309500  | -1.17814300 | 4.24505300  |
| H | 3.23138000  | 0.11679200  | 4.29198800  |
| H | 1.64739900  | 0.39603800  | 3.52995700  |
| C | 6.29773300  | 4.10128900  | 1.30194700  |
| H | 6.61521800  | 5.03557400  | 1.77817200  |
| H | 6.94244700  | 3.29433300  | 1.66576900  |
| H | 6.46086600  | 4.20512000  | 0.22293500  |
| C | 3.92352600  | 4.95746900  | 1.11946400  |
| H | 4.01710000  | 5.08766700  | 0.03496400  |
| H | 2.87102700  | 4.75578200  | 1.34468000  |
| H | 4.20420300  | 5.90290300  | 1.59691100  |
| C | -2.28158200 | 3.25856700  | -2.97458900 |
| H | -1.72087900 | 3.33274800  | -3.91126500 |
| H | -3.10521700 | 3.98004900  | -3.02522900 |
| H | -1.61483600 | 3.55258300  | -2.15897100 |
| C | -3.83873400 | 1.49947900  | -3.87285500 |
| H | -4.16833800 | 0.45718500  | -3.81688000 |
| H | -4.72161800 | 2.13922400  | -3.75676400 |
| H | -3.42159800 | 1.67008700  | -4.87172600 |

|   |             |             |             |
|---|-------------|-------------|-------------|
| C | -6.88167700 | 3.09769300  | 1.47287500  |
| H | -7.40686800 | 3.94174700  | 1.93360000  |
| H | -7.39741800 | 2.83829200  | 0.54235800  |
| H | -6.96170200 | 2.24278700  | 2.15444400  |
| C | -4.69956900 | 3.85066500  | 2.50977200  |
| H | -4.70717300 | 3.02009600  | 3.22545000  |
| H | -3.65573900 | 4.12119700  | 2.31854200  |
| H | -5.19651600 | 4.70554300  | 2.98197200  |
| C | -4.93921600 | -2.20371200 | 0.68317500  |
| H | -5.89007400 | -1.74528600 | 0.97951500  |
| H | -4.96078100 | -2.35406600 | -0.39982100 |
| H | -4.87179500 | -3.18810400 | 1.16001600  |
| C | -3.71900500 | -1.25159700 | 2.65292100  |
| H | -2.97524800 | -0.52913700 | 2.99975000  |
| H | -4.69334300 | -0.97640600 | 3.07298900  |
| H | -3.45249400 | -2.23313600 | 3.05786700  |
| C | 0.44063800  | 1.68947800  | -1.46813700 |
| O | 0.50144500  | 2.31987800  | -0.38374800 |
| O | 0.56104700  | 1.91035700  | -2.65318400 |
| H | -0.38024000 | -5.36444100 | 4.17542000  |

<sup>Q</sup>In6

| ATOM | X           | Y           | Z           |
|------|-------------|-------------|-------------|
| Fe   | 0.12365200  | 0.23695200  | 0.05087700  |
| N    | 1.52498700  | -1.16822200 | -0.82877700 |
| N    | -1.13362400 | -1.04107500 | -1.25172600 |
| C    | 3.40291400  | 0.08885800  | -0.05886200 |
| C    | 3.80262400  | 1.12264700  | -0.92982400 |
| C    | 4.12121200  | 2.35929000  | -0.36457900 |
| H    | 4.40990700  | 3.16936300  | -1.03115800 |
| C    | 4.06999700  | 2.59249800  | 1.00697000  |
| C    | 3.74505900  | 1.52725500  | 1.84270500  |
| H    | 3.73460600  | 1.69250000  | 2.91593200  |
| C    | 3.41214200  | 0.27081100  | 1.33766100  |
| C    | 2.84184000  | -1.16726200 | -0.63665000 |
| C    | 3.63732000  | -2.26201900 | -1.02835300 |
| H    | 4.70238400  | -2.24144700 | -0.82942700 |
| C    | 3.06124400  | -3.32170800 | -1.68844200 |
| H    | 3.66112800  | -4.16929500 | -2.00590100 |
| C    | 1.68365000  | -3.28882100 | -1.98584700 |
| C    | 1.01102800  | -4.31686800 | -2.72961800 |
| H    | 1.58960600  | -5.16512200 | -3.08175200 |
| C    | -0.31602300 | -4.22540000 | -2.99451700 |
| H    | -0.82175200 | -4.99915000 | -3.56383800 |

|   |             |             |             |
|---|-------------|-------------|-------------|
| C | -1.08789700 | -3.11007400 | -2.52166600 |
| C | -2.47015200 | -2.97053300 | -2.75802100 |
| H | -2.99715300 | -3.71845300 | -3.34278000 |
| C | -3.13663500 | -1.88943000 | -2.23534400 |
| H | -4.20003300 | -1.75842900 | -2.39868200 |
| C | -2.44215600 | -0.93515100 | -1.46024700 |
| C | -0.46436700 | -2.09804600 | -1.77255400 |
| C | 0.95425100  | -2.18216000 | -1.51690200 |
| C | -3.17624600 | 0.20003500  | -0.82048700 |
| C | -3.76526900 | 0.00340900  | 0.44415000  |
| C | -4.44560800 | 1.06844200  | 1.02983300  |
| H | -4.89475900 | 0.93249400  | 2.00929000  |
| C | -4.55191900 | 2.31002100  | 0.40500600  |
| C | -3.96810200 | 2.47069700  | -0.84784900 |
| H | -4.04676700 | 3.43710200  | -1.33704000 |
| C | -3.27662400 | 1.43681100  | -1.48180700 |
| C | -3.69534900 | -1.34005600 | 1.16078000  |
| H | -2.77571400 | -1.84528800 | 0.84380100  |
| C | -2.68423800 | 1.64434100  | -2.87042600 |
| H | -1.77537800 | 1.03722900  | -2.93886600 |
| C | 4.03701800  | 0.99433900  | -2.43770300 |
| H | 4.00998200  | 2.02375900  | -2.81442900 |
| C | 3.13598300  | -0.89462400 | 2.27885200  |
| H | 2.36865400  | -1.52775200 | 1.81934200  |
| C | 4.35025600  | 3.96991000  | 1.57883400  |
| H | 4.21414500  | 3.90400300  | 2.66575600  |
| C | -5.25818000 | 3.46847300  | 1.08581800  |
| H | -5.24149300 | 4.31574000  | 0.38860400  |
| C | -0.52561800 | 0.61698400  | 1.83573900  |
| H | -0.86808700 | 1.48703600  | 2.37447000  |
| C | -0.28499500 | -0.63426700 | 1.78883100  |
| C | 0.31380800  | 2.17072100  | -0.99608500 |
| C | -0.30794600 | -1.92431100 | 2.45808700  |
| C | -0.46906300 | -1.98924500 | 3.85086700  |
| C | -0.18611100 | -3.11889900 | 1.73966600  |
| C | -0.50795500 | -3.21594400 | 4.50214700  |
| H | -0.56437000 | -1.06499700 | 4.41260400  |
| C | -0.23368000 | -4.34791200 | 2.39042100  |
| H | -0.06083600 | -3.07952000 | 0.66419000  |
| C | -0.39321000 | -4.40025900 | 3.77318700  |
| H | -0.63364300 | -3.25074300 | 5.58029600  |
| H | -0.14332200 | -5.26549800 | 1.81679600  |
| C | 5.46200600  | 0.46835000  | -2.68179400 |
| H | 5.69404700  | 0.48231900  | -3.75283000 |

|   |             |             |             |
|---|-------------|-------------|-------------|
| H | 6.20650100  | 1.07794400  | -2.15900300 |
| H | 5.56251000  | -0.56480800 | -2.32998700 |
| C | 3.02596500  | 0.21443000  | -3.29026400 |
| H | 3.14214800  | -0.86871400 | -3.19489900 |
| H | 2.00051400  | 0.49275000  | -3.04196600 |
| H | 3.20528100  | 0.45871400  | -4.34385700 |
| C | 4.40651200  | -1.74420900 | 2.45081400  |
| H | 5.20844700  | -1.14472800 | 2.89748300  |
| H | 4.20775400  | -2.59550800 | 3.11162700  |
| H | 4.77137800  | -2.13550700 | 1.49664300  |
| C | 2.61371500  | -0.47238400 | 3.65438400  |
| H | 2.29470200  | -1.35875900 | 4.21140500  |
| H | 3.39053000  | 0.02567900  | 4.24590000  |
| H | 1.75599600  | 0.20104000  | 3.56694700  |
| C | 5.79545300  | 4.41223700  | 1.31385000  |
| H | 5.99095700  | 5.38249700  | 1.78387300  |
| H | 6.51112300  | 3.68577100  | 1.71323900  |
| H | 5.98321000  | 4.51720200  | 0.23885400  |
| C | 3.34893100  | 5.00278500  | 1.04251600  |
| H | 3.48491500  | 5.15771400  | -0.03416900 |
| H | 2.31726200  | 4.67462600  | 1.20456500  |
| H | 3.49067900  | 5.96879100  | 1.53982500  |
| C | -2.26955400 | 3.09368500  | -3.14765500 |
| H | -1.68530900 | 3.13498500  | -4.07254600 |
| H | -3.14167600 | 3.74441300  | -3.28217700 |
| H | -1.65369800 | 3.49646300  | -2.33907000 |
| C | -3.66845500 | 1.17026700  | -3.95247300 |
| H | -3.91699200 | 0.11029600  | -3.84536400 |
| H | -4.60152900 | 1.74355400  | -3.89702000 |
| H | -3.23674500 | 1.31628200  | -4.94910500 |
| C | -6.72657400 | 3.14602500  | 1.39202100  |
| H | -7.22680300 | 4.01892000  | 1.82590800  |
| H | -7.26485800 | 2.85767900  | 0.48300200  |
| H | -6.80981000 | 2.32272500  | 2.11105000  |
| C | -4.50911500 | 3.89423900  | 2.35645100  |
| H | -4.51652600 | 3.09094000  | 3.10255400  |
| H | -3.46483600 | 4.13778500  | 2.13380200  |
| H | -4.98085700 | 4.77513900  | 2.80609900  |
| C | -4.88850800 | -2.22832500 | 0.77239800  |
| H | -5.82938700 | -1.75011100 | 1.06934100  |
| H | -4.93116300 | -2.41393200 | -0.30440700 |
| H | -4.82279000 | -3.19704200 | 1.28046000  |
| C | -3.63246200 | -1.21150700 | 2.68698300  |
| H | -2.87121800 | -0.48995200 | 2.99571700  |

|   |             |             |             |
|---|-------------|-------------|-------------|
| H | -4.59614400 | -0.89964700 | 3.10598300  |
| H | -3.38049300 | -2.18092500 | 3.12872300  |
| O | 0.04607500  | 3.11971200  | -0.26089600 |
| O | 0.60066700  | 1.99354500  | -2.17926900 |
| H | -0.42814100 | -5.35873000 | 4.28223000  |

<sup>s</sup>In2

| ATOM | X           | Y           | Z           |
|------|-------------|-------------|-------------|
| Fe   | -0.24261600 | 0.59505900  | -0.13089500 |
| N    | -1.63457100 | 2.00866200  | -0.09362700 |
| N    | 0.92474600  | 2.18723100  | -0.07493700 |
| C    | -3.38301500 | 0.41946200  | 0.22132500  |
| C    | -3.95731600 | -0.32545000 | -0.82028100 |
| C    | -4.19978300 | -1.68245700 | -0.61128700 |
| H    | -4.62663900 | -2.26925500 | -1.42120300 |
| C    | -3.87759100 | -2.31487900 | 0.58892700  |
| C    | -3.33288600 | -1.54448300 | 1.61411900  |
| H    | -3.08138900 | -2.02925200 | 2.55477700  |
| C    | -3.07608800 | -0.18379800 | 1.45437100  |
| C    | -2.95402100 | 1.82954600  | 0.00848800  |
| C    | -3.84046200 | 2.92353600  | -0.02716900 |
| H    | -4.90574800 | 2.73360500  | 0.04553700  |
| C    | -3.35721400 | 4.21145100  | -0.13676200 |
| H    | -4.03735300 | 5.05742100  | -0.16339600 |
| C    | -1.96373000 | 4.42093200  | -0.18336600 |
| C    | -1.31561300 | 5.70372800  | -0.24511900 |
| H    | -1.93246800 | 6.59658900  | -0.28280800 |
| C    | 0.04084900  | 5.80425000  | -0.24730900 |
| H    | 0.51838400  | 6.77848100  | -0.28934600 |
| C    | 0.87848000  | 4.63475100  | -0.18577400 |
| C    | 2.28582200  | 4.64981400  | -0.14764100 |
| H    | 2.82629100  | 5.59106400  | -0.17190700 |
| C    | 2.95789400  | 3.44919500  | -0.06997100 |
| H    | 4.04125800  | 3.42511800  | -0.02680900 |
| C    | 2.26196200  | 2.22330800  | -0.03559600 |
| C    | 0.26267300  | 3.37756500  | -0.14358300 |
| C    | -1.15719100 | 3.27672300  | -0.15076300 |
| C    | 3.00697100  | 0.93205100  | 0.04886700  |
| C    | 3.25048500  | 0.35147200  | 1.30373700  |
| C    | 3.95880600  | -0.85043300 | 1.35386500  |
| H    | 4.14820200  | -1.31990000 | 2.31533700  |
| C    | 4.41806800  | -1.48309300 | 0.20241400  |
| C    | 4.15761300  | -0.88383400 | -1.02929800 |
| H    | 4.49703100  | -1.37573500 | -1.93644700 |

|   |             |             |             |
|---|-------------|-------------|-------------|
| C | 3.44887700  | 0.31030600  | -1.13206900 |
| C | 2.77040900  | 1.01688700  | 2.58691300  |
| H | 1.87785100  | 1.60521300  | 2.34418000  |
| C | 3.16341300  | 0.91604100  | -2.49902400 |
| H | 2.25484300  | 1.52172400  | -2.40691500 |
| C | -4.27024500 | 0.29313600  | -2.17418900 |
| H | -3.87884800 | 1.31577000  | -2.18078500 |
| C | -2.44541900 | 0.60415900  | 2.59570200  |
| H | -2.49956300 | 1.66964300  | 2.35181000  |
| C | -4.06547400 | -3.81097700 | 0.76344000  |
| H | -3.84954900 | -4.04563300 | 1.81372800  |
| C | 5.14931500  | -2.81059300 | 0.28348100  |
| H | 5.26271900  | -3.05654400 | 1.34717300  |
| C | -0.07500100 | -0.36651800 | -1.67995100 |
| C | 0.14102200  | -1.18689100 | -0.66389100 |
| H | -0.10708700 | -0.41979000 | -2.77059900 |
| C | 0.38221600  | -2.61309000 | -0.44878000 |
| C | 0.44688300  | -3.52937200 | -1.51191500 |
| C | 0.53817800  | -3.11271100 | 0.85361500  |
| C | 0.64767000  | -4.88657500 | -1.28175000 |
| H | 0.32864900  | -3.16032000 | -2.52787600 |
| C | 0.73818700  | -4.46977300 | 1.08977300  |
| H | 0.49624200  | -2.41028900 | 1.68222100  |
| C | 0.79105900  | -5.36425400 | 0.02125500  |
| H | 0.69001200  | -5.57751700 | -2.11960200 |
| H | 0.85349400  | -4.83202900 | 2.10786900  |
| C | 4.31285300  | 1.83380500  | -2.94265100 |
| H | 4.48041100  | 2.64686500  | -2.22969300 |
| H | 5.24532800  | 1.26310300  | -3.02827900 |
| H | 4.09565500  | 2.27909700  | -3.92024300 |
| C | 2.88904700  | -0.14151500 | -3.57560400 |
| H | 2.48621400  | 0.33883500  | -4.47393100 |
| H | 3.80444700  | -0.66713600 | -3.87111700 |
| H | 2.16450400  | -0.88253500 | -3.22521500 |
| C | 6.55458300  | -2.72616300 | -0.32666800 |
| H | 7.14575700  | -1.93668300 | 0.14952000  |
| H | 7.08415000  | -3.67703300 | -0.19982700 |
| H | 6.50618700  | -2.51226700 | -1.40073100 |
| C | 4.32647700  | -3.92950800 | -0.37031600 |
| H | 4.19580100  | -3.74466800 | -1.44318600 |
| H | 4.83034500  | -4.89611600 | -0.25464700 |
| H | 3.33111300  | -4.00218500 | 0.07950600  |
| C | 3.83498800  | 1.98261500  | 3.12939900  |
| H | 4.75476900  | 1.43819500  | 3.37406700  |

|   |             |             |             |
|---|-------------|-------------|-------------|
| H | 4.08477100  | 2.75639500  | 2.39666200  |
| H | 3.47783700  | 2.47726500  | 4.03970100  |
| C | 2.36133600  | 0.01383300  | 3.67099300  |
| H | 3.22902200  | -0.50246500 | 4.09643500  |
| H | 1.86057500  | 0.53708800  | 4.49276200  |
| H | 1.67413400  | -0.74183200 | 3.27691200  |
| C | -5.78498300 | 0.37719600  | -2.40477300 |
| H | -6.23482900 | -0.62255300 | -2.42169900 |
| H | -6.27503800 | 0.95256200  | -1.61163200 |
| H | -6.00097900 | 0.86091400  | -3.36390700 |
| C | -3.57379100 | -0.45812600 | -3.31651500 |
| H | -3.97426500 | -1.47158800 | -3.43366000 |
| H | -3.72549900 | 0.06946900  | -4.26472200 |
| H | -2.49816500 | -0.53740800 | -3.12989400 |
| C | -3.06012200 | -4.58344800 | -0.10354100 |
| H | -3.16253100 | -5.66258800 | 0.05878600  |
| H | -3.23244900 | -4.38432600 | -1.16813500 |
| H | -2.03000500 | -4.29498000 | 0.13001000  |
| C | -5.50505300 | -4.25428300 | 0.47469500  |
| H | -5.76895500 | -4.08914400 | -0.57624300 |
| H | -5.62384200 | -5.32365000 | 0.68107300  |
| H | -6.22032600 | -3.70295200 | 1.09418500  |
| C | -3.20523500 | 0.41710300  | 3.91653100  |
| H | -4.26946400 | 0.64027000  | 3.78991500  |
| H | -3.11563400 | -0.60653000 | 4.29648400  |
| H | -2.80182900 | 1.08988400  | 4.68107600  |
| C | -0.96682100 | 0.24612800  | 2.78276800  |
| H | -0.52512200 | 0.83568200  | 3.59309700  |
| H | -0.84753900 | -0.81541300 | 3.02312200  |
| H | -0.34500400 | 0.43074200  | 1.88561200  |
| H | 0.94641600  | -6.42406000 | 0.20136200  |

<sup>1</sup>In2

| ATOM | X           | Y           | Z           |
|------|-------------|-------------|-------------|
| Fe   | -0.36327900 | 0.31799700  | -0.06313600 |
| N    | 0.78523600  | 2.08317400  | 0.03908100  |
| N    | -1.88389400 | 1.72734200  | -0.04971400 |
| C    | 2.99463500  | 1.04018500  | 0.17054400  |
| C    | 3.16819700  | 0.34013100  | 1.37686800  |
| C    | 4.10347100  | -0.68834700 | 1.41250400  |
| H    | 4.25312800  | -1.23309400 | 2.34248200  |
| C    | 4.87243900  | -1.03794800 | 0.30156200  |
| C    | 4.65690700  | -0.34414400 | -0.88452600 |
| H    | 5.21751000  | -0.61691300 | -1.77276800 |

|   |             |             |             |
|---|-------------|-------------|-------------|
| C | 3.73155800  | 0.69816000  | -0.97241800 |
| C | 2.10372600  | 2.23377700  | 0.14095900  |
| C | 2.69713300  | 3.51388400  | 0.24698300  |
| H | 3.77622200  | 3.57783300  | 0.33063800  |
| C | 1.91806500  | 4.64056300  | 0.23533700  |
| H | 2.36156600  | 5.62887000  | 0.31026900  |
| C | 0.51633300  | 4.50380900  | 0.13596200  |
| C | -0.37603100 | 5.62689400  | 0.12979100  |
| H | 0.04918500  | 6.62395100  | 0.19076500  |
| C | -1.71844700 | 5.44745800  | 0.05359200  |
| H | -2.39402900 | 6.29734600  | 0.04963400  |
| C | -2.27816800 | 4.12861900  | -0.01252600 |
| C | -3.66716500 | 3.88424500  | -0.06992000 |
| H | -4.36300400 | 4.71782100  | -0.07661500 |
| C | -4.11752100 | 2.58900900  | -0.11234900 |
| H | -5.17717300 | 2.36385100  | -0.15531600 |
| C | -3.19863500 | 1.51711100  | -0.09810700 |
| C | -1.42838600 | 3.01024200  | -0.01052500 |
| C | 0.00151100  | 3.20062200  | 0.05139600  |
| C | -3.71317200 | 0.11884500  | -0.13935900 |
| C | -3.91546500 | -0.50361300 | -1.37790200 |
| C | -4.43931400 | -1.79674400 | -1.39397900 |
| H | -4.60110700 | -2.29268300 | -2.34887400 |
| C | -4.74997700 | -2.48002000 | -0.22124300 |
| C | -4.52481100 | -1.83709000 | 0.99623800  |
| H | -4.74986400 | -2.36047900 | 1.92301800  |
| C | -4.00545400 | -0.54599600 | 1.06113000  |
| C | -3.56297300 | 0.18298600  | -2.68874800 |
| H | -3.08725500 | 1.14184600  | -2.45782500 |
| C | -3.75113200 | 0.09593100  | 2.41693700  |
| H | -3.27573200 | 1.06877900  | 2.25343600  |
| C | 2.42608700  | 0.72769700  | 2.64861700  |
| H | 1.67968900  | 1.48711200  | 2.39627900  |
| C | 3.51196200  | 1.40569300  | -2.30348100 |
| H | 2.95137100  | 2.32748600  | -2.11446100 |
| C | 5.93526800  | -2.11539500 | 0.45339600  |
| H | 5.45187000  | -2.96661700 | 0.95003300  |
| C | -5.28536200 | -3.89958800 | -0.27109700 |
| H | -5.43342600 | -4.15444900 | -1.32826500 |
| C | -0.94698300 | -1.44650100 | -0.03314000 |
| C | 0.37085100  | -1.44147200 | -0.16137600 |
| H | -1.73567800 | -2.19578600 | 0.01882500  |
| C | 1.42673300  | -2.43993800 | -0.29327800 |
| C | 1.83040400  | -3.22638500 | 0.79817700  |

|   |             |             |             |
|---|-------------|-------------|-------------|
| C | 2.04671700  | -2.67352200 | -1.52985200 |
| C | 2.81213700  | -4.20244100 | 0.65779800  |
| H | 1.36305400  | -3.06502800 | 1.76528900  |
| C | 3.02022300  | -3.65653400 | -1.67355800 |
| H | 1.74860100  | -2.07619900 | -2.38612500 |
| C | 3.41243700  | -4.42665900 | -0.58006200 |
| H | 3.10699400  | -4.79560100 | 1.52012600  |
| H | 3.47859700  | -3.82035200 | -2.64596600 |
| C | -5.06675600 | 0.34931100  | 3.16475100  |
| H | -4.87642900 | 0.84575600  | 4.12289400  |
| H | -5.73683000 | 0.98493700  | 2.57538700  |
| H | -5.58914500 | -0.59219300 | 3.37094400  |
| C | -2.77647400 | -0.73948700 | 3.25789800  |
| H | -2.54351200 | -0.22199800 | 4.19553000  |
| H | -3.20507600 | -1.71556800 | 3.51324500  |
| H | -1.84379500 | -0.90923300 | 2.70952600  |
| C | -4.26684900 | -4.89070800 | 0.30975700  |
| H | -3.30458900 | -4.81335400 | -0.20752700 |
| H | -4.09392100 | -4.69402500 | 1.37449500  |
| H | -4.63025200 | -5.91987600 | 0.21138700  |
| C | -6.64244700 | -4.02879300 | 0.43277200  |
| H | -7.37075800 | -3.32287300 | 0.01963300  |
| H | -7.04106000 | -5.04248000 | 0.31396700  |
| H | -6.55132600 | -3.83057200 | 1.50709400  |
| C | -2.54341500 | -0.63392400 | -3.49382300 |
| H | -1.65695000 | -0.84775600 | -2.88712500 |
| H | -2.96802400 | -1.58810600 | -3.82671200 |
| H | -2.23266200 | -0.07882300 | -4.38626600 |
| C | -4.82182300 | 0.48452500  | -3.51262100 |
| H | -5.34405600 | -0.44000200 | -3.78529500 |
| H | -5.51940100 | 1.11200900  | -2.94690200 |
| H | -4.56030300 | 1.00949800  | -4.43823600 |
| C | 7.06675900  | -1.61410900 | 1.36661500  |
| H | 6.68772600  | -1.30547100 | 2.34642500  |
| H | 7.81507900  | -2.39962000 | 1.52298700  |
| H | 7.56859800  | -0.75092700 | 0.91254200  |
| C | 6.51439800  | -2.61969400 | -0.86864000 |
| H | 7.09126900  | -1.83707700 | -1.37681500 |
| H | 7.19361200  | -3.45860200 | -0.68196300 |
| H | 5.72647500  | -2.96246300 | -1.54565300 |
| C | 2.65150100  | 0.54283700  | -3.23699700 |
| H | 2.47198500  | 1.06160100  | -4.18582000 |
| H | 3.15162400  | -0.40796900 | -3.45526000 |
| H | 1.68359000  | 0.31762700  | -2.77523800 |

|   |            |             |             |
|---|------------|-------------|-------------|
| C | 4.82327200 | 1.81781400  | -2.98308400 |
| H | 4.61107900 | 2.40826200  | -3.88129800 |
| H | 5.44345500 | 2.42319500  | -2.31323700 |
| H | 5.41118900 | 0.94740600  | -3.29501600 |
| C | 3.39357000 | 1.35731900  | 3.66140500  |
| H | 4.16146600 | 0.63812400  | 3.96968800  |
| H | 3.90031100 | 2.22825800  | 3.23067900  |
| H | 2.85519500 | 1.68282900  | 4.55888300  |
| C | 1.66224000 | -0.45137100 | 3.26157200  |
| H | 0.95285500 | -0.85963100 | 2.53482700  |
| H | 2.33997000 | -1.25483400 | 3.57218800  |
| H | 1.10687100 | -0.12149700 | 4.14737100  |
| H | 4.18044200 | -5.18724200 | -0.68964600 |

<sup>99</sup>In2

| ATOM | X           | Y           | Z           |
|------|-------------|-------------|-------------|
| Fe   | -0.32640800 | 0.36403600  | -0.12731600 |
| N    | 0.74388700  | 2.12364200  | -0.01904800 |
| N    | -1.90885200 | 1.71978900  | -0.29140000 |
| C    | 2.89336100  | 1.08491900  | 0.41543700  |
| C    | 2.77774000  | 0.33407400  | 1.60572300  |
| C    | 3.57951600  | -0.79096100 | 1.76163200  |
| H    | 3.49977500  | -1.37466300 | 2.67551700  |
| C    | 4.50464200  | -1.19075300 | 0.79362800  |
| C    | 4.59372000  | -0.43685400 | -0.36940800 |
| H    | 5.29932000  | -0.72841400 | -1.14097200 |
| C    | 3.79562900  | 0.69141600  | -0.58510100 |
| C    | 2.06218700  | 2.31198800  | 0.23011700  |
| C    | 2.61957600  | 3.57497900  | 0.32120000  |
| H    | 3.67746500  | 3.67313300  | 0.53654600  |
| C    | 1.81435300  | 4.71607000  | 0.12180000  |
| H    | 2.24784600  | 5.71063800  | 0.17481900  |
| C    | 0.45964800  | 4.55967100  | -0.12302400 |
| C    | -0.45662900 | 5.66113900  | -0.31199600 |
| H    | -0.05191500 | 6.66970000  | -0.30044600 |
| C    | -1.78311800 | 5.45575500  | -0.48910600 |
| H    | -2.45857200 | 6.29626000  | -0.62476400 |
| C    | -2.34230100 | 4.12567200  | -0.48826100 |
| C    | -3.69415100 | 3.85550400  | -0.63122800 |
| H    | -4.39891400 | 4.67121800  | -0.76792000 |
| C    | -4.14843200 | 2.52657400  | -0.57816400 |
| H    | -5.20288900 | 2.29022200  | -0.66352800 |
| C    | -3.23376900 | 1.49904600  | -0.39243800 |
| C    | -1.44843500 | 3.02517900  | -0.31960000 |

|   |             |             |             |
|---|-------------|-------------|-------------|
| C | -0.07072500 | 3.23646900  | -0.16276300 |
| C | -3.67231200 | 0.07833700  | -0.26079600 |
| C | -3.67164900 | -0.76403300 | -1.38206800 |
| C | -4.00725600 | -2.10832200 | -1.20853100 |
| H | -4.00811500 | -2.77267700 | -2.07036200 |
| C | -4.32523800 | -2.63233400 | 0.04111700  |
| C | -4.32857400 | -1.76796100 | 1.13744600  |
| H | -4.56358600 | -2.16341800 | 2.12288900  |
| C | -4.01004100 | -0.41706500 | 1.01117700  |
| C | -3.32818100 | -0.24461000 | -2.76993200 |
| H | -2.99739900 | 0.79399300  | -2.67044200 |
| C | -3.97188300 | 0.46492600  | 2.25199600  |
| H | -3.84073400 | 1.50168000  | 1.92765100  |
| C | 1.88719100  | 0.79764900  | 2.75319200  |
| H | 1.09584300  | 1.42885600  | 2.33830300  |
| C | 3.96640300  | 1.47682700  | -1.87971900 |
| H | 3.16792700  | 2.22277800  | -1.93511400 |
| C | 5.38783600  | -2.39770900 | 1.07284400  |
| H | 4.71977500  | -3.20811600 | 1.39541500  |
| C | -4.60825500 | -4.11355800 | 0.21332700  |
| H | -4.65012400 | -4.55852500 | -0.78899700 |
| C | -0.81948600 | -1.40218600 | 0.47737800  |
| C | 0.23217400  | -1.50742500 | -0.24492900 |
| H | -1.62894300 | -1.89331300 | 0.99938200  |
| C | 1.26059400  | -2.36908100 | -0.80480300 |
| C | 1.83802100  | -3.38291300 | -0.02792800 |
| C | 1.65885300  | -2.22492800 | -2.13784100 |
| C | 2.78125700  | -4.24058900 | -0.58172800 |
| H | 1.54093900  | -3.49002000 | 1.01097800  |
| C | 2.59805000  | -3.08855300 | -2.69288500 |
| H | 1.21129100  | -1.43927900 | -2.73971700 |
| C | 3.15993700  | -4.10022100 | -1.91714700 |
| H | 3.22280400  | -5.02275500 | 0.02895700  |
| H | 2.89149000  | -2.96860500 | -3.73156400 |
| C | -5.28390800 | 0.40517700  | 3.04431300  |
| H | -5.25682800 | 1.12173500  | 3.87261700  |
| H | -6.14004600 | 0.65132100  | 2.40700800  |
| H | -5.45472800 | -0.58890700 | 3.47300600  |
| C | -2.76918800 | 0.10899100  | 3.13789100  |
| H | -2.73487500 | 0.76127100  | 4.01821700  |
| H | -2.83135600 | -0.92887100 | 3.48746200  |
| H | -1.83006800 | 0.22447300  | 2.58654900  |
| C | -3.46166100 | -4.79253700 | 0.97699500  |
| H | -2.50456100 | -4.63618500 | 0.46748300  |

|   |             |             |             |
|---|-------------|-------------|-------------|
| H | -3.37403400 | -4.38314400 | 1.99062200  |
| H | -3.63556000 | -5.87105500 | 1.06200500  |
| C | -5.95754700 | -4.37455200 | 0.89427300  |
| H | -6.77665500 | -3.90105500 | 0.34286400  |
| H | -6.15585100 | -5.45069200 | 0.94795700  |
| H | -5.96971300 | -3.98368900 | 1.91827100  |
| C | -2.17422400 | -1.02602000 | -3.41055100 |
| H | -1.29246400 | -1.01796600 | -2.76080900 |
| H | -2.44625800 | -2.07142600 | -3.59622700 |
| H | -1.90109200 | -0.57656600 | -4.37173600 |
| C | -4.57101200 | -0.24397200 | -3.67065600 |
| H | -4.95026200 | -1.26174900 | -3.82058300 |
| H | -5.37438800 | 0.35405100  | -3.22682400 |
| H | -4.33370700 | 0.17691200  | -4.65417200 |
| C | 6.35404600  | -2.09661200 | 2.23061300  |
| H | 5.82019300  | -1.78761600 | 3.13499800  |
| H | 6.95079900  | -2.98293300 | 2.47462200  |
| H | 7.04151800  | -1.28906800 | 1.95178700  |
| C | 6.16937800  | -2.89662300 | -0.14319500 |
| H | 6.92044300  | -2.16368400 | -0.46177400 |
| H | 6.69838000  | -3.82232700 | 0.10763900  |
| H | 5.50711800  | -3.10172300 | -0.98971100 |
| C | 3.84502100  | 0.59443600  | -3.12794700 |
| H | 3.92454300  | 1.20967800  | -4.03125300 |
| H | 4.63444000  | -0.16413800 | -3.17216600 |
| H | 2.88258000  | 0.07621000  | -3.14914700 |
| C | 5.30265600  | 2.23373900  | -1.87930200 |
| H | 5.40991500  | 2.82582400  | -2.79526400 |
| H | 5.37421500  | 2.91210300  | -1.02270000 |
| H | 6.14592200  | 1.53473200  | -1.82758900 |
| C | 2.70707100  | 1.66679700  | 3.71934200  |
| H | 3.52284800  | 1.08412300  | 4.16410600  |
| H | 3.14530700  | 2.52461700  | 3.19784000  |
| H | 2.07439800  | 2.04482600  | 4.53074500  |
| C | 1.19657600  | -0.34934300 | 3.49860200  |
| H | 0.66297100  | -1.00486400 | 2.80286200  |
| H | 1.90747700  | -0.95641700 | 4.07087900  |
| H | 0.46930200  | 0.05634800  | 4.21096800  |
| H | 3.89339400  | -4.77550700 | -2.34781600 |

<sup>T</sup>In3

| ATOM | X           | Y           | Z           |
|------|-------------|-------------|-------------|
| N    | -1.06560600 | -1.26455000 | -1.08566200 |
| N    | 1.57466700  | -1.27517100 | -0.94062900 |

|   |             |             |             |
|---|-------------|-------------|-------------|
| C | -3.07779900 | 0.04724100  | -0.65490200 |
| C | -3.79188700 | 0.07923900  | 0.55886000  |
| C | -4.31221500 | 1.29654200  | 1.01041700  |
| H | -4.85168900 | 1.32743300  | 1.95473200  |
| C | -4.13782700 | 2.48146600  | 0.30596700  |
| C | -3.45736600 | 2.42672400  | -0.91128600 |
| H | -3.32018900 | 3.34314400  | -1.47805700 |
| C | -2.92750100 | 1.23861700  | -1.40582900 |
| C | -2.44409200 | -1.21084000 | -1.15226600 |
| C | -3.17098800 | -2.24627500 | -1.71559900 |
| H | -4.25276900 | -2.15182400 | -1.76386300 |
| C | -2.54533800 | -3.37821000 | -2.25016400 |
| H | -3.12407700 | -4.18225400 | -2.69696100 |
| C | -1.11445600 | -3.44302400 | -2.24422400 |
| C | -0.35293700 | -4.49393400 | -2.78780600 |
| H | -0.87268300 | -5.33192500 | -3.24930400 |
| C | 1.04358800  | -4.47290400 | -2.75738700 |
| H | 1.60864700  | -5.29245300 | -3.19801600 |
| C | 1.74511900  | -3.40716000 | -2.16443100 |
| C | 3.17236200  | -3.29713600 | -2.10786600 |
| H | 3.79499600  | -4.06987700 | -2.55069600 |
| C | 3.73965700  | -2.16922400 | -1.50189700 |
| H | 4.82037900  | -2.05631500 | -1.46213200 |
| C | 2.95227000  | -1.18916700 | -0.92864100 |
| C | 0.99187400  | -2.34742500 | -1.58015000 |
| C | -0.42522600 | -2.34651600 | -1.64694700 |
| C | 3.46968400  | 0.01114500  | -0.20750700 |
| C | 3.60515100  | 1.25227600  | -0.87388700 |
| C | 3.87900300  | 2.39632200  | -0.12304500 |
| H | 3.95722500  | 3.35039200  | -0.64093300 |
| C | 4.01580700  | 2.36569000  | 1.26279800  |
| C | 3.95092400  | 1.12637200  | 1.88751100  |
| H | 4.09747100  | 1.07320800  | 2.96564700  |
| C | 3.69460000  | -0.05646900 | 1.18466800  |
| C | 3.54623200  | 1.43966300  | -2.39179700 |
| H | 3.65302800  | 2.52111700  | -2.54671100 |
| C | 3.79113900  | -1.34764700 | 2.00188500  |
| H | 3.71802100  | -1.02783800 | 3.04968300  |
| C | -4.03375700 | -1.17819300 | 1.38190300  |
| H | -3.27733100 | -1.91136500 | 1.08667800  |
| C | -2.27102000 | 1.21195600  | -2.78149800 |
| H | -1.47534000 | 0.46233400  | -2.75032300 |
| C | -4.66493300 | 3.79649700  | 0.85056600  |
| H | -5.10024000 | 3.58944800  | 1.83740100  |

|   |             |             |             |
|---|-------------|-------------|-------------|
| C | 4.21808700  | 3.63773000  | 2.06473300  |
| H | 4.25763300  | 3.35075200  | 3.12413900  |
| C | -3.90514200 | -0.95735200 | 2.89526400  |
| H | -3.86244300 | -1.92478300 | 3.40873400  |
| H | -2.99700900 | -0.40090500 | 3.14057300  |
| H | -4.76485200 | -0.40918700 | 3.29959800  |
| C | -5.41472300 | -1.77685800 | 1.07155900  |
| H | -6.20753700 | -1.07185200 | 1.35176000  |
| H | -5.52835300 | -2.00363000 | 0.00761900  |
| H | -5.57026300 | -2.70405800 | 1.63650300  |
| C | -3.29666300 | 0.75604800  | -3.83270600 |
| H | -4.11995400 | 1.47883100  | -3.90161500 |
| H | -2.82794400 | 0.68092100  | -4.82161900 |
| H | -3.71738100 | -0.22200100 | -3.57820200 |
| C | -1.63223400 | 2.53971500  | -3.19874400 |
| H | -1.04048000 | 2.38692700  | -4.10971500 |
| H | -2.39131900 | 3.29725700  | -3.43469800 |
| H | -0.97585900 | 2.92730800  | -2.41346700 |
| C | -3.53650400 | 4.81978600  | 1.04174900  |
| H | -3.90714700 | 5.70836500  | 1.56645400  |
| H | -2.70131200 | 4.39164600  | 1.60532000  |
| H | -3.13577700 | 5.14516100  | 0.07455900  |
| C | -5.77884700 | 4.36717600  | -0.03802700 |
| H | -5.39688800 | 4.59520100  | -1.04026400 |
| H | -6.60206400 | 3.65219000  | -0.14553800 |
| H | -6.18082800 | 5.29409900  | 0.38798600  |
| C | 5.18577700  | -1.97166500 | 1.83006800  |
| H | 5.31089000  | -2.82112000 | 2.51260700  |
| H | 5.31856900  | -2.33662700 | 0.80626600  |
| H | 5.97593000  | -1.24231400 | 2.04058400  |
| C | 2.70250900  | -2.40961000 | 1.80776000  |
| H | 1.71305700  | -1.95479600 | 1.77423600  |
| H | 2.83915500  | -2.97850700 | 0.88511500  |
| H | 2.73061800  | -3.11244600 | 2.64989700  |
| C | 5.54808600  | 4.32140300  | 1.71982900  |
| H | 5.69315000  | 5.21760600  | 2.33419600  |
| H | 6.39496400  | 3.64704500  | 1.88866200  |
| H | 5.56715400  | 4.63032100  | 0.66784300  |
| C | 3.03741700  | 4.60289100  | 1.88540500  |
| H | 2.99844000  | 4.98733500  | 0.85965800  |
| H | 2.07935500  | 4.10851600  | 2.07842600  |
| H | 3.13999900  | 5.46070100  | 2.56110100  |
| C | 2.23198300  | 1.04792100  | -3.08065100 |
| H | 2.09070100  | -0.03551400 | -3.10427700 |

|    |             |             |             |
|----|-------------|-------------|-------------|
| H  | 1.37946300  | 1.49892000  | -2.56377500 |
| H  | 2.24797200  | 1.41208100  | -4.11602600 |
| C  | 4.74951300  | 0.78560200  | -3.08831600 |
| H  | 5.69208500  | 1.08981400  | -2.61890200 |
| H  | 4.67906100  | -0.30478000 | -3.04451700 |
| H  | 4.78224800  | 1.08187200  | -4.14398400 |
| C  | -0.35814800 | 0.38864900  | 2.12351600  |
| O  | 0.26080000  | 1.99345100  | -0.47999800 |
| C  | -0.51820500 | -0.79525000 | 2.35479200  |
| H  | -0.27764600 | 1.49248700  | 1.92417700  |
| C  | 0.03794300  | 3.15157100  | 0.16276100  |
| C  | -0.72370400 | -2.17084300 | 2.70807800  |
| O  | -0.21231400 | 3.09567100  | 1.41943800  |
| O  | 0.09334100  | 4.20838400  | -0.50682600 |
| C  | -0.93816100 | -3.14267200 | 1.72197200  |
| C  | -0.71363600 | -2.54922900 | 4.05824000  |
| C  | -1.14197800 | -4.46932200 | 2.08355800  |
| H  | -0.94408000 | -2.84248700 | 0.68090700  |
| C  | -0.92178100 | -3.87815100 | 4.41174000  |
| H  | -0.54666400 | -1.79625600 | 4.82224100  |
| C  | -1.13598800 | -4.84167900 | 3.42688100  |
| H  | -1.30529500 | -5.21315200 | 1.30929600  |
| H  | -0.91520500 | -4.16175300 | 5.46008700  |
| Fe | 0.26366400  | 0.13021500  | -0.29549900 |
| H  | -1.29689300 | -5.87890800 | 3.70557800  |

<sup>Q</sup>In3

| ATOM | X           | Y           | Z           |
|------|-------------|-------------|-------------|
| N    | -1.21723700 | -1.15701500 | -1.01332600 |
| N    | 1.43545400  | -1.38191500 | -0.78757200 |
| C    | -3.11004800 | 0.31424000  | -0.73095600 |
| C    | -3.81980100 | 0.37912300  | 0.48276400  |
| C    | -4.27056200 | 1.62304800  | 0.93312800  |
| H    | -4.80398600 | 1.68912200  | 1.87848000  |
| C    | -4.02673400 | 2.79751000  | 0.22769000  |
| C    | -3.34078000 | 2.70576300  | -0.98128700 |
| H    | -3.12629400 | 3.61366200  | -1.53600200 |
| C    | -2.86741300 | 1.49057700  | -1.47024300 |
| C    | -2.54735700 | -0.98411300 | -1.22532900 |
| C    | -3.34017800 | -1.90466200 | -1.87804100 |
| H    | -4.39193200 | -1.69127400 | -2.03440700 |
| C    | -2.76218100 | -3.12403600 | -2.35368700 |
| H    | -3.38293600 | -3.87299200 | -2.84181800 |
| C    | -1.41555800 | -3.32956900 | -2.20773400 |

|   |             |             |             |
|---|-------------|-------------|-------------|
| C | -0.70583000 | -4.50286700 | -2.67462200 |
| H | -1.28514100 | -5.30464400 | -3.13021700 |
| C | 0.64075300  | -4.61134600 | -2.57605500 |
| H | 1.14483300  | -5.49885000 | -2.95557100 |
| C | 1.45795200  | -3.55749500 | -2.00086000 |
| C | 2.82598700  | -3.55868000 | -1.97950100 |
| H | 3.38502700  | -4.39484700 | -2.39414400 |
| C | 3.51666500  | -2.42209100 | -1.42689600 |
| H | 4.59993600  | -2.36817900 | -1.45109500 |
| C | 2.80048600  | -1.40276600 | -0.85410100 |
| C | 0.74507600  | -2.42169400 | -1.45941800 |
| C | -0.61456300 | -2.30659300 | -1.57123900 |
| C | 3.44851000  | -0.21104500 | -0.21841700 |
| C | 3.58880400  | 0.99468500  | -0.94677800 |
| C | 4.03229200  | 2.13713200  | -0.27818100 |
| H | 4.12381100  | 3.06417100  | -0.84109200 |
| C | 4.33445200  | 2.14025300  | 1.08141700  |
| C | 4.24453300  | 0.93198600  | 1.75986200  |
| H | 4.50740000  | 0.90387700  | 2.81650200  |
| C | 3.82005700  | -0.25053400 | 1.14254900  |
| C | 3.39250100  | 1.14383700  | -2.45909600 |
| H | 3.51087300  | 2.21784500  | -2.65173900 |
| C | 3.89857400  | -1.51080300 | 2.00996800  |
| H | 4.01648500  | -1.13889700 | 3.03634700  |
| C | -4.11790200 | -0.86994000 | 1.30392700  |
| H | -3.35452900 | -1.61671300 | 1.05928900  |
| C | -2.13294000 | 1.44496600  | -2.80380500 |
| H | -1.41925000 | 0.61729500  | -2.75189600 |
| C | -4.40862600 | 4.14221800  | 0.82079300  |
| H | -5.16777400 | 3.95719300  | 1.59303300  |
| C | 4.74128000  | 3.41401300  | 1.79910200  |
| H | 4.88635600  | 3.15861000  | 2.85724900  |
| C | -4.05715000 | -0.63041100 | 2.81738800  |
| H | -4.11456200 | -1.58870700 | 3.34459700  |
| H | -3.12302700 | -0.13805900 | 3.10367900  |
| H | -4.89476900 | -0.01483200 | 3.16644300  |
| C | -5.48982500 | -1.45250100 | 0.93162500  |
| H | -6.28384200 | -0.72717100 | 1.14980400  |
| H | -5.54000900 | -1.70482100 | -0.13085000 |
| H | -5.69303200 | -2.36248900 | 1.50941600  |
| C | -3.12203600 | 1.14347500  | -3.94081900 |
| H | -3.87408700 | 1.93943800  | -4.01660700 |
| H | -2.59810300 | 1.07986500  | -4.90248200 |
| H | -3.63955900 | 0.19414700  | -3.76833200 |

|   |             |             |             |
|---|-------------|-------------|-------------|
| C | -1.33156900 | 2.71657400  | -3.10345600 |
| H | -0.66319000 | 2.53555700  | -3.95403600 |
| H | -1.98758200 | 3.55183400  | -3.38235400 |
| H | -0.73126500 | 3.00907900  | -2.23549300 |
| C | -3.18326200 | 4.76805800  | 1.50739700  |
| H | -3.43645400 | 5.73771500  | 1.95315600  |
| H | -2.80596700 | 4.11211900  | 2.29922300  |
| H | -2.36478500 | 4.91287900  | 0.79232500  |
| C | -5.01609800 | 5.10928600  | -0.20174700 |
| H | -4.27929700 | 5.41254300  | -0.95390400 |
| H | -5.86606100 | 4.65519000  | -0.72290100 |
| H | -5.36644300 | 6.01921000  | 0.29851400  |
| C | 5.17300000  | -2.30954400 | 1.69211500  |
| H | 5.31311000  | -3.10898400 | 2.43015600  |
| H | 5.09966300  | -2.76756200 | 0.70160900  |
| H | 6.05956400  | -1.66554800 | 1.71220300  |
| C | 2.67279100  | -2.42839100 | 2.03604100  |
| H | 1.76385800  | -1.85686100 | 2.22822800  |
| H | 2.53851400  | -2.96840000 | 1.09677100  |
| H | 2.79304100  | -3.16594500 | 2.83987400  |
| C | 6.07224700  | 3.96201200  | 1.26634900  |
| H | 6.37084200  | 4.85936600  | 1.82091100  |
| H | 6.87164100  | 3.21823500  | 1.35714000  |
| H | 5.98444700  | 4.23576200  | 0.20819100  |
| C | 3.63410200  | 4.47445700  | 1.72062400  |
| H | 3.50688800  | 4.82888300  | 0.69085400  |
| H | 2.66992700  | 4.06845000  | 2.04459700  |
| H | 3.89002300  | 5.34117600  | 2.34242100  |
| C | 2.01943800  | 0.77050000  | -3.03343000 |
| H | 1.84822000  | -0.30812000 | -3.02710900 |
| H | 1.21592500  | 1.25217500  | -2.46749100 |
| H | 1.96270300  | 1.11951000  | -4.07267600 |
| C | 4.51987200  | 0.43993000  | -3.23132900 |
| H | 5.50392900  | 0.75751400  | -2.86769000 |
| H | 4.44300500  | -0.64518400 | -3.11720300 |
| H | 4.45510900  | 0.67994300  | -4.29968200 |
| C | -0.23200500 | 0.28450300  | 2.40587700  |
| O | 0.21121600  | 1.97601500  | -0.20610600 |
| C | -0.55493400 | -0.88162000 | 2.52816300  |
| H | 0.04497500  | 1.35931200  | 2.26797500  |
| C | 0.29233600  | 3.09572800  | 0.53104600  |
| C | -0.93351900 | -2.25400200 | 2.70690700  |
| O | 0.40765200  | 2.96703800  | 1.79998700  |
| O | 0.25006000  | 4.19415600  | -0.07469100 |

|    |             |             |             |
|----|-------------|-------------|-------------|
| C  | -0.71185600 | -3.18841900 | 1.68585100  |
| C  | -1.52432100 | -2.67338900 | 3.90745900  |
| C  | -1.09217000 | -4.51406300 | 1.86156100  |
| H  | -0.24510800 | -2.87105000 | 0.76064200  |
| C  | -1.89818000 | -4.00234000 | 4.07629900  |
| H  | -1.69486800 | -1.94996400 | 4.69865600  |
| C  | -1.68702800 | -4.92592600 | 3.05320200  |
| H  | -0.92092600 | -5.22586500 | 1.05899900  |
| H  | -2.35790700 | -4.31683700 | 5.00860800  |
| Fe | 0.19468300  | 0.10147800  | -0.17098700 |
| H  | -1.98185100 | -5.96268000 | 3.18688600  |

<sup>T</sup>In4

| ATOM | X           | Y           | Z           |
|------|-------------|-------------|-------------|
| Fe   | 0.42829300  | -0.47346100 | 0.07364000  |
| N    | -0.26877100 | -2.45603600 | -0.14026800 |
| N    | 2.22041300  | -1.53944300 | -0.02595700 |
| C    | -2.61337200 | -1.87003500 | -0.04065600 |
| C    | -3.21721000 | -1.63342700 | 1.21066600  |
| C    | -4.19576200 | -0.63960600 | 1.29637800  |
| H    | -4.65424700 | -0.45084300 | 2.26543000  |
| C    | -4.60137000 | 0.11238100  | 0.19505000  |
| C    | -4.00171800 | -0.15773900 | -1.03017200 |
| H    | -4.30986800 | 0.41847300  | -1.89950800 |
| C    | -3.00043600 | -1.11992400 | -1.16592000 |
| C    | -1.53727800 | -2.89774500 | -0.20131100 |
| C    | -1.86089500 | -4.23429300 | -0.42144300 |
| H    | -2.90403300 | -4.52219000 | -0.49351400 |
| C    | -0.83729400 | -5.18792400 | -0.53816900 |
| H    | -1.07265200 | -6.23697300 | -0.69857000 |
| C    | 0.48479600  | -4.77716400 | -0.44726900 |
| C    | 1.61746200  | -5.66582000 | -0.54536700 |
| H    | 1.42856400  | -6.72748100 | -0.68546000 |
| C    | 2.88824200  | -5.20033500 | -0.47011200 |
| H    | 3.72827500  | -5.88676600 | -0.54655500 |
| C    | 3.17084200  | -3.79390000 | -0.29285100 |
| C    | 4.45034300  | -3.26176700 | -0.22408000 |
| H    | 5.31781200  | -3.91257700 | -0.29577400 |
| C    | 4.60587600  | -1.86716900 | -0.06884400 |
| H    | 5.59084800  | -1.41471400 | -0.02192500 |
| C    | 3.48402500  | -1.05946900 | 0.01846000  |
| C    | 2.06109900  | -2.90464700 | -0.18984000 |
| C    | 0.74486900  | -3.38686800 | -0.25902200 |
| C    | 3.58890500  | 0.42425300  | 0.15250800  |

|   |             |             |             |
|---|-------------|-------------|-------------|
| C | 3.56263300  | 1.22479700  | -1.00346100 |
| C | 3.55040800  | 2.61064000  | -0.85981500 |
| H | 3.51521300  | 3.23268700  | -1.75172700 |
| C | 3.54394800  | 3.22074500  | 0.39481300  |
| C | 3.59204600  | 2.40595900  | 1.52263600  |
| H | 3.59248600  | 2.87225200  | 2.50601100  |
| C | 3.60850800  | 1.01284500  | 1.42577800  |
| C | 3.52597800  | 0.61163400  | -2.39591100 |
| H | 3.38960400  | -0.46788100 | -2.28346300 |
| C | 3.63114100  | 0.16895000  | 2.69171200  |
| H | 3.51782200  | -0.87903700 | 2.39836900  |
| C | -2.92298500 | -2.40298700 | 2.49962100  |
| C | -2.36558100 | -1.35266400 | -2.53015900 |
| H | -1.42358000 | -1.88591100 | -2.37402600 |
| C | -5.66777700 | 1.18645800  | 0.31591800  |
| H | -5.69583300 | 1.72200900  | -0.64196500 |
| C | 3.42174500  | 4.72762000  | 0.53053700  |
| H | 3.49623700  | 4.96655400  | 1.59938700  |
| C | -3.72329200 | -3.71366600 | 2.55782400  |
| H | -3.61142200 | -4.18428600 | 3.54196200  |
| H | -4.78954300 | -3.53298400 | 2.38299700  |
| H | -3.36585000 | -4.42096000 | 1.80279300  |
| C | -3.26785600 | -2.24211500 | -3.39698400 |
| H | -4.23894000 | -1.76114500 | -3.56756300 |
| H | -2.80481100 | -2.42961000 | -4.37290000 |
| H | -3.44652900 | -3.20746500 | -2.91060100 |
| C | -2.01624100 | -0.04452800 | -3.25106300 |
| H | -1.42760900 | -0.25838800 | -4.15070400 |
| H | -2.91309100 | 0.49971600  | -3.57083100 |
| H | -1.42966800 | 0.60999100  | -2.59730900 |
| C | -7.05113300 | 0.56199100  | 0.54753000  |
| H | -7.82677000 | 1.33601600  | 0.57517300  |
| H | -7.30226900 | -0.14848900 | -0.24744000 |
| H | -7.07835700 | 0.02314800  | 1.50243600  |
| C | -5.34105500 | 2.21617000  | 1.40468600  |
| H | -5.34128900 | 1.75586300  | 2.39980600  |
| H | -4.36003500 | 2.67047800  | 1.23538800  |
| H | -6.09165200 | 3.01478200  | 1.40782500  |
| C | 2.46336500  | 0.50346900  | 3.62819400  |
| H | 2.45987600  | -0.17743400 | 4.48729100  |
| H | 2.53352500  | 1.52680200  | 4.01513300  |
| H | 1.50663000  | 0.40104400  | 3.10372700  |
| C | 4.98087400  | 0.30256200  | 3.40941500  |
| H | 5.80341900  | 0.00530100  | 2.74948900  |

|   |             |             |             |
|---|-------------|-------------|-------------|
| H | 5.15777200  | 1.33764000  | 3.72569800  |
| H | 5.00930700  | -0.33318900 | 4.30208400  |
| C | 4.55086400  | 5.47280100  | -0.19241400 |
| H | 4.46326700  | 6.55293400  | -0.02924400 |
| H | 5.53227200  | 5.14843600  | 0.16991900  |
| H | 4.51373700  | 5.29569300  | -1.27361600 |
| C | 2.04419500  | 5.19997800  | 0.04106200  |
| H | 1.92892700  | 5.01702200  | -1.03393600 |
| H | 1.23919800  | 4.66419000  | 0.55575200  |
| H | 1.91573400  | 6.27426400  | 0.21668900  |
| C | 4.85905200  | 0.83471200  | -3.12237200 |
| H | 5.05392000  | 1.90441400  | -3.26616500 |
| H | 5.69162600  | 0.41257200  | -2.54876400 |
| H | 4.84594800  | 0.35785700  | -4.10928600 |
| C | 2.34360700  | 1.13025100  | -3.22466600 |
| H | 1.39877200  | 0.97038400  | -2.69333400 |
| H | 2.43728000  | 2.20162800  | -3.43772700 |
| H | 2.29419500  | 0.60397400  | -4.18492900 |
| C | -0.38438800 | 1.32748000  | 0.14111700  |
| C | -1.07931200 | 2.33976600  | 0.04806500  |
| C | -2.00773800 | 3.41942300  | -0.10110300 |
| C | -2.92642200 | 3.40821800  | -1.16658300 |
| C | -2.06275900 | 4.48162400  | 0.81702100  |
| C | -3.87343600 | 4.41660500  | -1.29883200 |
| H | -2.89431300 | 2.58747500  | -1.87614200 |
| C | -3.01396000 | 5.48849500  | 0.68019300  |
| H | -1.35877100 | 4.50179500  | 1.64383700  |
| C | -3.92458800 | 5.46017300  | -0.37474900 |
| H | -4.58017300 | 4.38542000  | -2.12350000 |
| H | -3.04537900 | 6.29755200  | 1.40456100  |
| C | -1.44627300 | -2.65243300 | 2.83650100  |
| H | -1.01985700 | -3.46921800 | 2.24800600  |
| H | -0.83832700 | -1.75949400 | 2.65780000  |
| H | -1.36127300 | -2.92514000 | 3.89502300  |
| H | -3.31236100 | -1.76502000 | 3.30328100  |
| H | -4.66903700 | 6.24449400  | -0.47554700 |

<sup>99</sup>In4

| ATOM | X           | Y           | Z           |
|------|-------------|-------------|-------------|
| Fe   | -0.08639200 | -0.60869100 | -0.03313300 |
| N    | 1.15667800  | -2.32422900 | 0.12486900  |
| N    | -1.51080900 | -2.17261000 | 0.02544600  |
| C    | 3.20930100  | -1.06877800 | 0.05477500  |
| C    | 3.66427300  | -0.57397900 | -1.18377500 |

|   |             |             |             |
|---|-------------|-------------|-------------|
| C | 4.26996500  | 0.68474800  | -1.21138200 |
| H | 4.60266300  | 1.07541600  | -2.17112200 |
| C | 4.45637100  | 1.45404600  | -0.06375100 |
| C | 4.01199300  | 0.93226700  | 1.14631400  |
| H | 4.14907600  | 1.52019100  | 2.05122900  |
| C | 3.37371800  | -0.30602400 | 1.22526500  |
| C | 2.49728400  | -2.38053400 | 0.16061900  |
| C | 3.19963000  | -3.57121200 | 0.32605800  |
| H | 4.28250400  | -3.54941600 | 0.37920100  |
| C | 2.49095800  | -4.78287900 | 0.42357100  |
| H | 3.02036700  | -5.72431400 | 0.54732800  |
| C | 1.10654500  | -4.76957600 | 0.36174900  |
| C | 0.28061200  | -5.95196400 | 0.44398300  |
| H | 0.77227900  | -6.91555400 | 0.55508900  |
| C | -1.07087400 | -5.87570700 | 0.38782400  |
| H | -1.67407700 | -6.77842000 | 0.45150600  |
| C | -1.75204800 | -4.60887000 | 0.24401600  |
| C | -3.12963600 | -4.47159400 | 0.18494200  |
| H | -3.76702900 | -5.35028400 | 0.24422100  |
| C | -3.69239000 | -3.18521400 | 0.04980400  |
| H | -4.76657000 | -3.04266600 | 0.00272400  |
| C | -2.85240700 | -2.08130400 | -0.02249400 |
| C | -0.94921000 | -3.42989300 | 0.15993900  |
| C | 0.45030500  | -3.50848200 | 0.21509900  |
| C | -3.39491400 | -0.69484600 | -0.15135100 |
| C | -3.62391400 | 0.06979200  | 1.00615200  |
| C | -4.04996600 | 1.38908000  | 0.86599900  |
| H | -4.21517000 | 1.98676000  | 1.75966800  |
| C | -4.23894400 | 1.97307500  | -0.38679100 |
| C | -4.01979000 | 1.18927200  | -1.51628600 |
| H | -4.16528400 | 1.63471400  | -2.49866800 |
| C | -3.59311300 | -0.13740800 | -1.42314600 |
| C | -3.40873900 | -0.51024300 | 2.39655400  |
| H | -2.91718000 | -1.48099900 | 2.28312100  |
| C | -3.33682000 | -0.93711600 | -2.69193000 |
| H | -2.89957700 | -1.89719600 | -2.40175800 |
| C | 3.58695400  | -1.31938800 | -2.51676900 |
| C | 2.88496600  | -0.80922300 | 2.57699800  |
| H | 2.18362100  | -1.62843000 | 2.39690600  |
| C | 5.07004600  | 2.84181600  | -0.12680000 |
| H | 5.29322000  | 3.14260000  | 0.90529600  |
| C | -4.60477300 | 3.44067300  | -0.51999100 |
| H | -4.80077800 | 3.63340300  | -1.58282900 |
| C | 4.72087300  | -2.34842000 | -2.64603500 |

|   |             |             |             |
|---|-------------|-------------|-------------|
| H | 4.72758800  | -2.78338800 | -3.65251200 |
| H | 5.69665100  | -1.88368600 | -2.46673000 |
| H | 4.58977000  | -3.16219700 | -1.92603100 |
| C | 4.05385100  | -1.36999800 | 3.39851600  |
| H | 4.79953700  | -0.59109000 | 3.59982700  |
| H | 3.69945200  | -1.75822300 | 4.36070600  |
| H | 4.55079400  | -2.18620600 | 2.86239300  |
| C | 2.11767400  | 0.26478200  | 3.35923500  |
| H | 1.65614800  | -0.17777200 | 4.24935600  |
| H | 2.77567100  | 1.07338100  | 3.69850900  |
| H | 1.32760100  | 0.70276000  | 2.73949300  |
| C | 6.38520800  | 2.87521000  | -0.91434100 |
| H | 6.84319300  | 3.86845300  | -0.84757900 |
| H | 7.09974500  | 2.14111800  | -0.52667900 |
| H | 6.22074400  | 2.65941800  | -1.97627800 |
| C | 4.06133000  | 3.85073500  | -0.69606600 |
| H | 3.79212400  | 3.58890700  | -1.72662600 |
| H | 3.14049300  | 3.86676900  | -0.10465800 |
| H | 4.48562700  | 4.86169600  | -0.70303800 |
| C | -2.32556600 | -0.24323000 | -3.61332800 |
| H | -2.09401700 | -0.88310300 | -4.47269400 |
| H | -2.71433700 | 0.70598700  | -4.00043500 |
| H | -1.39282300 | -0.03611100 | -3.07669200 |
| C | -4.65109400 | -1.23377300 | -3.42613700 |
| H | -5.34021600 | -1.79069800 | -2.78169800 |
| H | -5.14858600 | -0.30601200 | -3.73322300 |
| H | -4.46458200 | -1.83060500 | -4.32649100 |
| C | -5.87337800 | 3.80531500  | 0.26087700  |
| H | -6.13664700 | 4.85557300  | 0.09208200  |
| H | -6.72078200 | 3.18400600  | -0.04837900 |
| H | -5.72966200 | 3.66878400  | 1.33890000  |
| C | -3.42128300 | 4.32401100  | -0.09641700 |
| H | -3.18805600 | 4.17683300  | 0.96500600  |
| H | -2.52071900 | 4.07900000  | -0.66874300 |
| H | -3.65116200 | 5.38488600  | -0.24964500 |
| C | -4.75405900 | -0.75185500 | 3.09450100  |
| H | -5.29354000 | 0.19183200  | 3.24078800  |
| H | -5.38858100 | -1.41609100 | 2.49735800  |
| H | -4.60372800 | -1.21226500 | 4.07793000  |
| C | -2.48439800 | 0.36447000  | 3.25321400  |
| H | -1.53227600 | 0.53947800  | 2.74013900  |
| H | -2.93647700 | 1.33848600  | 3.47377200  |
| H | -2.27721200 | -0.12867200 | 4.20990200  |
| C | 0.07379100  | 1.35656500  | -0.09461200 |

|   |            |             |             |
|---|------------|-------------|-------------|
| C | 0.19963400 | 2.57961800  | -0.02860900 |
| C | 0.36722400 | 3.99796400  | 0.05529300  |
| C | 0.55216100 | 4.62593000  | 1.29959000  |
| C | 0.36620800 | 4.79630100  | -1.10238500 |
| C | 0.73264800 | 6.00266700  | 1.38022000  |
| H | 0.55610100 | 4.01831500  | 2.19981200  |
| C | 0.54698800 | 6.17240200  | -1.01579700 |
| H | 0.22548500 | 4.32143600  | -2.06872800 |
| C | 0.73210700 | 6.78248000  | 0.22430700  |
| H | 0.87571000 | 6.46949500  | 2.35070700  |
| H | 0.54477100 | 6.77161500  | -1.92211000 |
| C | 2.23503900 | -1.95258500 | -2.87501000 |
| H | 2.05562900 | -2.88198100 | -2.32815700 |
| H | 1.40450000 | -1.27215100 | -2.65899700 |
| H | 2.22290600 | -2.18792600 | -3.94590300 |
| H | 3.77311200 | -0.55374200 | -3.28075600 |
| H | 0.87504400 | 7.85699500  | 0.29016300  |

<sup>T</sup>In5

| ATOM | X           | Y           | Z           |
|------|-------------|-------------|-------------|
| Fe   | -0.12080600 | 0.60343300  | 0.24438100  |
| N    | 1.19973800  | 2.21514200  | -0.26521700 |
| N    | -1.44090700 | 2.18667100  | 0.04241800  |
| C    | 3.10402000  | 0.79705000  | -0.52114400 |
| C    | 3.88230700  | 0.38125100  | 0.57042700  |
| C    | 4.24010900  | -0.96679300 | 0.66004000  |
| H    | 4.81758000  | -1.29763800 | 1.51756800  |
| C    | 3.83077400  | -1.89995000 | -0.28454500 |
| C    | 3.12515300  | -1.44437900 | -1.39910700 |
| H    | 2.82654900  | -2.17035700 | -2.15024500 |
| C    | 2.75677800  | -0.11162300 | -1.54516200 |
| C    | 2.51241200  | 2.16916300  | -0.53963200 |
| C    | 3.25126200  | 3.32081500  | -0.81415700 |
| H    | 4.31031200  | 3.23293700  | -1.02915300 |
| C    | 2.62140800  | 4.56968900  | -0.79159200 |
| H    | 3.18965200  | 5.47563600  | -0.98567500 |
| C    | 1.25703300  | 4.64865200  | -0.53783200 |
| C    | 0.49756100  | 5.87229700  | -0.52330800 |
| H    | 1.02327600  | 6.81009300  | -0.68362400 |
| C    | -0.84483100 | 5.86411200  | -0.32481600 |
| H    | -1.40250800 | 6.79728400  | -0.32232500 |
| C    | -1.57838300 | 4.63327100  | -0.13159200 |
| C    | -2.95824100 | 4.56175800  | 0.02162300  |
| H    | -3.55663800 | 5.46832600  | 0.02004800  |

|   |             |             |             |
|---|-------------|-------------|-------------|
| C | -3.57125900 | 3.29225300  | 0.14706200  |
| H | -4.64902300 | 3.19959500  | 0.22968900  |
| C | -2.79598000 | 2.15135200  | 0.14012500  |
| C | -0.83607400 | 3.42077900  | -0.11964600 |
| C | 0.55626200  | 3.43102900  | -0.30163500 |
| C | -3.35845800 | 0.77025200  | 0.19062700  |
| C | -3.55495400 | 0.07405900  | -1.01301500 |
| C | -3.93543900 | -1.26988800 | -0.96143800 |
| H | -4.06283500 | -1.80849300 | -1.89590700 |
| C | -4.13992400 | -1.92923700 | 0.24808700  |
| C | -3.98837900 | -1.19462200 | 1.42663100  |
| H | -4.17955000 | -1.68883900 | 2.37668900  |
| C | -3.58504800 | 0.13843500  | 1.42662500  |
| C | -3.37949900 | 0.75743400  | -2.36375700 |
| C | -3.44653600 | 0.89615500  | 2.73923900  |
| H | -2.91957100 | 1.83301100  | 2.53095800  |
| C | 4.38363600  | 1.35814100  | 1.62706600  |
| C | 2.04665000  | 0.36883100  | -2.80710400 |
| H | 1.28474700  | 1.09680400  | -2.50821400 |
| C | 4.13347600  | -3.38247700 | -0.15084100 |
| H | 3.29452100  | -3.91301400 | -0.62076000 |
| C | -4.50021600 | -3.40630000 | 0.34451700  |
| H | -5.38907500 | -3.47548300 | 0.98795500  |
| C | 5.85467300  | 1.70477000  | 1.34706500  |
| H | 6.22108100  | 2.44392800  | 2.06892000  |
| H | 6.48300400  | 0.80944100  | 1.42913300  |
| H | 5.98601100  | 2.11499400  | 0.33967700  |
| C | 3.04570800  | 1.09006600  | -3.72776000 |
| H | 3.83657200  | 0.39913400  | -4.04420800 |
| H | 2.54036200  | 1.46409600  | -4.62578000 |
| H | 3.51627500  | 1.93966300  | -3.22341500 |
| C | 1.33341700  | -0.73987400 | -3.58401000 |
| H | 0.71746000  | -0.29919800 | -4.37559300 |
| H | 2.04647600  | -1.42068400 | -4.06429300 |
| H | 0.68389000  | -1.33342400 | -2.93479200 |
| C | 5.41077300  | -3.74810700 | -0.92137100 |
| H | 5.60387100  | -4.82573200 | -0.86427700 |
| H | 5.32983000  | -3.46953700 | -1.97779500 |
| H | 6.27629200  | -3.22435300 | -0.49746900 |
| C | 4.21453100  | -3.85400600 | 1.30448900  |
| H | 5.13121400  | -3.49744100 | 1.79006700  |
| H | 3.36029900  | -3.49162100 | 1.88607000  |
| H | 4.23100000  | -4.94902700 | 1.34434000  |
| C | -2.62772300 | 0.14128400  | 3.79221000  |

|   |             |             |             |
|---|-------------|-------------|-------------|
| H | -2.56226800 | 0.74014400  | 4.70818600  |
| H | -3.09087000 | -0.81509800 | 4.06107800  |
| H | -1.60701800 | -0.04946200 | 3.44694400  |
| C | -4.83756000 | 1.26322700  | 3.27764500  |
| H | -5.39951800 | 1.85413100  | 2.54590500  |
| H | -5.41795700 | 0.35979200  | 3.50148600  |
| H | -4.75269900 | 1.84854500  | 4.20040300  |
| C | -4.84558900 | -4.05516700 | -0.99659800 |
| H | -5.16478800 | -5.09065800 | -0.83776500 |
| H | -5.65558600 | -3.52662300 | -1.51130700 |
| H | -3.97169600 | -4.07688300 | -1.65890500 |
| C | -3.37022300 | -4.19153000 | 1.03198600  |
| H | -2.46022900 | -4.16182600 | 0.42426300  |
| H | -3.13181500 | -3.77592900 | 2.01616400  |
| H | -3.66021000 | -5.23994700 | 1.16744800  |
| C | -2.21328100 | 0.17318500  | -3.16851000 |
| H | -1.27677100 | 0.22982000  | -2.60302200 |
| H | -2.39313900 | -0.87692700 | -3.42883900 |
| H | -2.07639500 | 0.72716500  | -4.10430000 |
| C | 0.47189700  | -0.80051300 | 1.46762400  |
| C | 0.05098200  | -1.36097900 | 0.39322200  |
| C | -0.10466800 | -2.66560800 | -0.23337900 |
| C | 0.47858500  | -3.78396600 | 0.38344500  |
| C | -0.81154300 | -2.84285300 | -1.42622500 |
| C | 0.36682100  | -5.04298900 | -0.19719800 |
| H | 1.00181000  | -3.63388500 | 1.32483600  |
| C | -0.92283100 | -4.10335000 | -2.00622700 |
| H | -1.28373000 | -1.98350400 | -1.88650000 |
| C | -0.32976400 | -5.20726100 | -1.39580700 |
| H | 0.82386100  | -5.90175300 | 0.28703900  |
| H | -1.47301800 | -4.22296000 | -2.93556800 |
| C | 1.02231600  | -0.95063000 | 2.87038700  |
| O | 1.48261900  | -2.08442400 | 3.13953000  |
| O | 0.94809600  | 0.05551100  | 3.61529500  |
| H | 3.80655500  | 2.28384600  | 1.53895200  |
| C | 4.21041300  | 0.85820500  | 3.06584600  |
| H | 4.80982900  | -0.03840600 | 3.26236500  |
| H | 4.54967900  | 1.63250500  | 3.76444800  |
| H | 3.16305900  | 0.62985700  | 3.28554200  |
| C | -4.68084100 | 0.71898800  | -3.17692900 |
| H | -4.96836700 | -0.30986800 | -3.42328600 |
| H | -5.50553800 | 1.17587500  | -2.61943200 |
| H | -4.55844500 | 1.26564900  | -4.11887800 |
| H | -3.14797200 | 1.81037900  | -2.17945200 |

|                  |             |             |             |
|------------------|-------------|-------------|-------------|
| H                | -0.41466900 | -6.19112600 | -1.84820400 |
| <sup>Q</sup> In5 |             |             |             |
| ATOM             | X           | Y           | Z           |
| Fe               | -0.07543200 | 0.58850400  | 0.22767200  |
| N                | 1.21209100  | 2.21544000  | -0.28842500 |
| N                | -1.44252700 | 2.17783500  | 0.03435100  |
| C                | 3.13520400  | 0.81798500  | -0.47960000 |
| C                | 3.82880000  | 0.39013100  | 0.66567600  |
| C                | 4.18546900  | -0.95533400 | 0.76222000  |
| H                | 4.68724600  | -1.29974300 | 1.66002400  |
| C                | 3.87606800  | -1.87372600 | -0.23800800 |
| C                | 3.25521900  | -1.40446700 | -1.39377800 |
| H                | 3.03833700  | -2.11234600 | -2.19135000 |
| C                | 2.87508600  | -0.07273100 | -1.53678300 |
| C                | 2.53275900  | 2.18365400  | -0.53476500 |
| C                | 3.25785700  | 3.33069000  | -0.84600200 |
| H                | 4.31683000  | 3.24992700  | -1.06134000 |
| C                | 2.60613800  | 4.57212000  | -0.87947900 |
| H                | 3.16126300  | 5.47851400  | -1.10698300 |
| C                | 1.24115600  | 4.63997300  | -0.63812500 |
| C                | 0.46852700  | 5.85677600  | -0.67343000 |
| H                | 0.98732800  | 6.79254200  | -0.86546400 |
| C                | -0.87331100 | 5.84396600  | -0.48138400 |
| H                | -1.44050700 | 6.77073400  | -0.51647800 |
| C                | -1.59451100 | 4.61379200  | -0.24124300 |
| C                | -2.97052700 | 4.53918600  | -0.08106100 |
| H                | -3.57384300 | 5.44203500  | -0.11641600 |
| C                | -3.57692400 | 3.27579200  | 0.10346300  |
| H                | -4.65348200 | 3.18151700  | 0.19600900  |
| C                | -2.79305300 | 2.13784900  | 0.14171200  |
| C                | -0.84143800 | 3.40589200  | -0.18152200 |
| C                | 0.55039300  | 3.42229600  | -0.36266300 |
| C                | -3.35707000 | 0.76060800  | 0.27234000  |
| C                | -3.73116600 | 0.05464400  | -0.88410000 |
| C                | -4.08854500 | -1.29103400 | -0.75987100 |
| H                | -4.34745900 | -1.84622600 | -1.65526600 |
| C                | -4.11148700 | -1.93607900 | 0.47443500  |
| C                | -3.80770400 | -1.18590400 | 1.61284000  |
| H                | -3.86681300 | -1.67020500 | 2.58443000  |
| C                | -3.41886500 | 0.14897900  | 1.53860900  |
| C                | -3.74370300 | 0.73810200  | -2.24886000 |
| C                | -3.15135000 | 0.95725400  | 2.80128500  |
| H                | -2.48603300 | 1.78444500  | 2.53083600  |
| C                | 4.24068600  | 1.37254200  | 1.75538000  |

|   |             |             |             |
|---|-------------|-------------|-------------|
| C | 2.25555900  | 0.40593100  | -2.84336800 |
| H | 1.83294600  | 1.40116600  | -2.67740000 |
| C | 4.20423600  | -3.35269000 | -0.11860700 |
| H | 3.38926200  | -3.89141600 | -0.62099000 |
| C | -4.44008200 | -3.41452500 | 0.63602600  |
| H | -5.20110100 | -3.48657800 | 1.42599400  |
| C | 5.66326500  | 1.88411300  | 1.47448300  |
| H | 5.96004100  | 2.62918700  | 2.22171600  |
| H | 6.38075700  | 1.05547300  | 1.51741200  |
| H | 5.74145300  | 2.34338900  | 0.48394200  |
| C | 3.34655500  | 0.54555100  | -3.91508500 |
| H | 3.81511100  | -0.42424400 | -4.12153100 |
| H | 2.92275400  | 0.92641100  | -4.85168300 |
| H | 4.12995600  | 1.23729300  | -3.58609400 |
| C | 1.10996100  | -0.48546300 | -3.32825100 |
| H | 0.63618300  | -0.04612200 | -4.21376300 |
| H | 1.45342500  | -1.49051600 | -3.59845800 |
| H | 0.35205900  | -0.59131500 | -2.54796300 |
| C | 5.50772300  | -3.67943000 | -0.86275300 |
| H | 5.71926100  | -4.75435100 | -0.82131800 |
| H | 5.44979900  | -3.38171800 | -1.91552400 |
| H | 6.35207400  | -3.14852100 | -0.40621700 |
| C | 4.25920400  | -3.84983700 | 1.32910600  |
| H | 5.15604300  | -3.48127600 | 1.84254600  |
| H | 3.38246200  | -3.51759900 | 1.89574300  |
| H | 4.30258900  | -4.94479200 | 1.34752400  |
| C | -2.45912300 | 0.17191900  | 3.91853300  |
| H | -2.26211200 | 0.84151000  | 4.76372500  |
| H | -3.08611200 | -0.64509900 | 4.29431800  |
| H | -1.49844800 | -0.23602700 | 3.59193700  |
| C | -4.46876100 | 1.56814200  | 3.30550200  |
| H | -4.93653300 | 2.19099800  | 2.53575500  |
| H | -5.17758900 | 0.77805800  | 3.58206200  |
| H | -4.29121100 | 2.19097100  | 4.18983700  |
| C | -5.01299300 | -4.06771500 | -0.62291300 |
| H | -5.30115900 | -5.10228700 | -0.40841500 |
| H | -5.89745400 | -3.53818700 | -0.99350200 |
| H | -4.26572300 | -4.09386500 | -1.42519000 |
| C | -3.20270900 | -4.19378500 | 1.11332800  |
| H | -2.42060300 | -4.17421200 | 0.34771100  |
| H | -2.78538900 | -3.76579200 | 2.03049500  |
| H | -3.46301800 | -5.23978100 | 1.31324100  |
| C | -2.41244700 | 0.56854900  | -2.99355800 |
| H | -1.57003100 | 0.89022100  | -2.37356600 |

|   |             |             |             |
|---|-------------|-------------|-------------|
| H | -2.25202100 | -0.47783700 | -3.27757200 |
| H | -2.40803200 | 1.16534000  | -3.91325700 |
| C | 0.47812600  | -0.89508600 | 1.35564600  |
| C | 0.03867700  | -1.38201500 | 0.25412000  |
| C | -0.15226200 | -2.63990700 | -0.45215600 |
| C | 0.51164100  | -3.78561400 | 0.01432100  |
| C | -0.98704800 | -2.74840600 | -1.56799500 |
| C | 0.35019400  | -5.00424100 | -0.63661600 |
| H | 1.13133200  | -3.69452200 | 0.90293400  |
| C | -1.15271500 | -3.96934100 | -2.21501100 |
| H | -1.52121900 | -1.86933800 | -1.90767300 |
| C | -0.48056300 | -5.10031900 | -1.75444400 |
| H | 0.86789500  | -5.88508700 | -0.26667800 |
| H | -1.81039400 | -4.03768100 | -3.07729700 |
| C | 1.03461300  | -1.12727700 | 2.74282700  |
| O | 1.48263100  | -2.27775900 | 2.95080200  |
| O | 0.97707700  | -0.15945500 | 3.53957900  |
| H | 3.56292000  | 2.23218200  | 1.70593800  |
| C | 4.15626900  | 0.81126200  | 3.17897000  |
| H | 4.88936200  | 0.01249000  | 3.34385600  |
| H | 4.38660400  | 1.60816600  | 3.89626500  |
| H | 3.15681000  | 0.42503600  | 3.39997500  |
| C | -4.91376000 | 0.29067800  | -3.13286500 |
| H | -4.79826500 | -0.74544500 | -3.47103000 |
| H | -5.86905700 | 0.37126200  | -2.60350500 |
| H | -4.96389000 | 0.92012500  | -4.02832800 |
| H | -3.87374700 | 1.81003600  | -2.06830200 |
| H | -0.60787300 | -6.05393500 | -2.25881300 |

<sup>1</sup>Ts1

| ATOM | X           | Y           | Z           |
|------|-------------|-------------|-------------|
| N    | -1.08947100 | -1.27598600 | -1.07225800 |
| N    | 1.55613700  | -1.24710900 | -0.95772100 |
| C    | -3.12930200 | -0.00415000 | -0.62563400 |
| C    | -3.82664600 | 0.00578300  | 0.59733500  |
| C    | -4.40559700 | 1.19886900  | 1.04326900  |
| H    | -4.93975200 | 1.21019100  | 1.99131100  |
| C    | -4.29485100 | 2.38403700  | 0.32678200  |
| C    | -3.60801400 | 2.35470800  | -0.88848300 |
| H    | -3.50727300 | 3.27480200  | -1.45697100 |
| C    | -3.02868600 | 1.18944700  | -1.38079100 |
| C    | -2.46901200 | -1.24637500 | -1.12679300 |
| C    | -3.18704800 | -2.29415700 | -1.67865900 |
| H    | -4.27165300 | -2.21963500 | -1.70374500 |

|   |             |             |             |
|---|-------------|-------------|-------------|
| C | -2.54896600 | -3.41118800 | -2.22865300 |
| H | -3.11827500 | -4.22543800 | -2.66901900 |
| C | -1.11707900 | -3.44348900 | -2.25217300 |
| C | -0.34681200 | -4.47117000 | -2.82648900 |
| H | -0.85990800 | -5.31272700 | -3.28905000 |
| C | 1.04861900  | -4.42201900 | -2.82567700 |
| H | 1.62112700  | -5.22180700 | -3.29232800 |
| C | 1.74065000  | -3.35208000 | -2.22894900 |
| C | 3.16600400  | -3.21506400 | -2.20701000 |
| H | 3.79186400  | -3.96709200 | -2.67997200 |
| C | 3.72385000  | -2.08203100 | -1.60367400 |
| H | 4.80231100  | -1.94245400 | -1.59434600 |
| C | 2.93102100  | -1.12959500 | -0.99244900 |
| C | 0.98002600  | -2.31835700 | -1.60787500 |
| C | -0.43792400 | -2.34106100 | -1.65286300 |
| C | 3.45645400  | 0.07399600  | -0.28433700 |
| C | 3.53199600  | 1.32326700  | -0.94675900 |
| C | 3.83543700  | 2.46444200  | -0.20344600 |
| H | 3.87066300  | 3.42394000  | -0.71622100 |
| C | 4.05961000  | 2.42231300  | 1.17140300  |
| C | 4.04763700  | 1.17768100  | 1.78738400  |
| H | 4.25595000  | 1.11729800  | 2.85498900  |
| C | 3.76267100  | -0.00271700 | 1.09042000  |
| C | 3.38913100  | 1.52066300  | -2.45823900 |
| H | 3.44528500  | 2.60679900  | -2.60752800 |
| C | 3.91822500  | -1.29734600 | 1.89398000  |
| H | 3.83406700  | -0.99146100 | 2.94506000  |
| C | -3.96883800 | -1.24886900 | 1.44732700  |
| H | -3.21150900 | -1.96077600 | 1.10695300  |
| C | -2.36329400 | 1.18781000  | -2.75208600 |
| H | -1.53031700 | 0.48030000  | -2.70916800 |
| C | -4.86933600 | 3.68064000  | 0.86875700  |
| H | -5.41114900 | 3.43786500  | 1.79278100  |
| C | 4.29349300  | 3.69024200  | 1.97114900  |
| H | 4.41605500  | 3.39391200  | 3.02140800  |
| C | -3.72440800 | -0.99719100 | 2.94092200  |
| H | -3.63033200 | -1.95375800 | 3.46804400  |
| H | -2.80222100 | -0.43109200 | 3.09812400  |
| H | -4.55256900 | -0.44530800 | 3.40213300  |
| C | -5.34552300 | -1.89817100 | 1.24257000  |
| H | -6.14362400 | -1.21674200 | 1.56326700  |
| H | -5.51770300 | -2.14686800 | 0.19074700  |
| H | -5.43018700 | -2.82031800 | 1.83032800  |
| C | -3.35712200 | 0.67922300  | -3.80967800 |

|   |             |             |             |
|---|-------------|-------------|-------------|
| H | -4.21423100 | 1.36073800  | -3.88678000 |
| H | -2.87770400 | 0.62523900  | -4.79481600 |
| H | -3.73154800 | -0.31767300 | -3.55645100 |
| C | -1.78629300 | 2.54276100  | -3.17137600 |
| H | -1.18399900 | 2.41516500  | -4.07921800 |
| H | -2.57747300 | 3.26531500  | -3.41149400 |
| H | -1.15048400 | 2.95691700  | -2.38353100 |
| C | -3.74806900 | 4.66512700  | 1.23065000  |
| H | -4.16175700 | 5.58206400  | 1.66713700  |
| H | -3.05179100 | 4.21997800  | 1.94869300  |
| H | -3.16541500 | 4.93987100  | 0.34400500  |
| C | -5.87141700 | 4.31858100  | -0.10227700 |
| H | -5.38048500 | 4.61935300  | -1.03504800 |
| H | -6.67541200 | 3.61880100  | -0.35506100 |
| H | -6.32117200 | 5.21475800  | 0.34079800  |
| C | 5.34097900  | -1.85008200 | 1.70687400  |
| H | 5.50566800  | -2.71517400 | 2.36071900  |
| H | 5.48935500  | -2.17427500 | 0.67106600  |
| H | 6.09763700  | -1.09292200 | 1.94081600  |
| C | 2.88705700  | -2.41549900 | 1.69351700  |
| H | 1.87719900  | -2.01521300 | 1.61343500  |
| H | 3.08528600  | -3.00088600 | 0.79229000  |
| H | 2.92325200  | -3.09435100 | 2.55485100  |
| C | 5.57771700  | 4.41049800  | 1.53906800  |
| H | 5.74841800  | 5.30017300  | 2.15632700  |
| H | 6.45014100  | 3.75430000  | 1.63191400  |
| H | 5.51007200  | 4.73674100  | 0.49441800  |
| C | 3.07984800  | 4.62722200  | 1.88795500  |
| H | 2.96543300  | 5.02834700  | 0.87379400  |
| H | 2.15100600  | 4.10204700  | 2.13363000  |
| H | 3.20282000  | 5.47586400  | 2.57152700  |
| C | 2.06332500  | 1.08126100  | -3.09458400 |
| H | 1.96557200  | -0.00639300 | -3.12974700 |
| H | 1.21364000  | 1.48868800  | -2.53837000 |
| H | 2.02046200  | 1.46009200  | -4.12404300 |
| C | 4.58661800  | 0.92062600  | -3.21185400 |
| H | 5.53512800  | 1.27605800  | -2.79297600 |
| H | 4.57293200  | -0.17165000 | -3.15629300 |
| H | 4.55039100  | 1.20808700  | -4.26983400 |
| C | -0.04704800 | 0.39793700  | 2.10268200  |
| O | 0.09484400  | 1.98111700  | -0.49824000 |
| C | -0.25060700 | -0.78117300 | 2.36824000  |
| H | -0.03768900 | 1.62804300  | 1.86343000  |
| C | -0.06056600 | 3.07613500  | 0.23345000  |

|    |             |             |             |
|----|-------------|-------------|-------------|
| C  | -0.49691300 | -2.14256900 | 2.74989900  |
| O  | -0.10609800 | 2.93284200  | 1.52766100  |
| O  | -0.15418600 | 4.18539500  | -0.32521500 |
| C  | -0.84340900 | -3.10466900 | 1.79070200  |
| C  | -0.40073200 | -2.52082500 | 4.09715900  |
| C  | -1.09602900 | -4.41629600 | 2.17610000  |
| H  | -0.91433500 | -2.80736900 | 0.75038100  |
| C  | -0.65609600 | -3.83495800 | 4.47476600  |
| H  | -0.12875400 | -1.77839400 | 4.84101600  |
| C  | -1.00585300 | -4.78630600 | 3.51718500  |
| H  | -1.36475800 | -5.15048200 | 1.42232900  |
| H  | -0.58019700 | -4.11655200 | 5.52103400  |
| Fe | 0.23190100  | 0.09840800  | -0.21144800 |
| H  | -1.20387700 | -5.81186900 | 3.81470400  |

<sup>Q</sup>Ts1

| ATOM | X           | Y           | Z           |
|------|-------------|-------------|-------------|
| N    | -1.17830300 | -1.21982400 | -1.04927500 |
| N    | 1.48105200  | -1.32624500 | -0.88604400 |
| C    | -3.14141400 | 0.16059100  | -0.69860000 |
| C    | -3.84634200 | 0.18605800  | 0.51882100  |
| C    | -4.35276100 | 1.40332500  | 0.98510900  |
| H    | -4.88999300 | 1.43037200  | 1.93116200  |
| C    | -4.16025200 | 2.59428800  | 0.29354500  |
| C    | -3.46869900 | 2.54586500  | -0.91701800 |
| H    | -3.29562200 | 3.46903800  | -1.46098300 |
| C    | -2.95359100 | 1.35707700  | -1.42620700 |
| C    | -2.53686500 | -1.11046700 | -1.20524500 |
| C    | -3.29768600 | -2.08482000 | -1.81199300 |
| H    | -4.36814600 | -1.92893200 | -1.91156800 |
| C    | -2.69043700 | -3.26133300 | -2.32905700 |
| H    | -3.28286500 | -4.03440800 | -2.81158200 |
| C    | -1.28862700 | -3.37821900 | -2.25992800 |
| C    | -0.54711400 | -4.46904500 | -2.79888600 |
| H    | -1.09349700 | -5.28102000 | -3.27614000 |
| C    | 0.82745700  | -4.50444200 | -2.74650200 |
| H    | 1.36713800  | -5.34060800 | -3.18803300 |
| C    | 1.57335500  | -3.45767000 | -2.14027200 |
| C    | 2.98509000  | -3.39993000 | -2.11975000 |
| H    | 3.57196000  | -4.19259300 | -2.57647200 |
| C    | 3.60508000  | -2.26995400 | -1.54423600 |
| H    | 4.68683500  | -2.16950600 | -1.55285400 |
| C    | 2.85023000  | -1.27999400 | -0.94750800 |
| C    | 0.84089500  | -2.38495900 | -1.55173500 |

|   |             |             |             |
|---|-------------|-------------|-------------|
| C | -0.55141000 | -2.32942700 | -1.63119000 |
| C | 3.43549600  | -0.07873600 | -0.27984200 |
| C | 3.51917100  | 1.15317800  | -0.97339700 |
| C | 3.89124000  | 2.29837900  | -0.26861700 |
| H | 3.94097400  | 3.24430700  | -0.80474900 |
| C | 4.17737400  | 2.27784300  | 1.09525600  |
| C | 4.14135000  | 1.04911700  | 1.74089700  |
| H | 4.39122400  | 1.00500400  | 2.80028600  |
| C | 3.78604100  | -0.13590800 | 1.08494300  |
| C | 3.33109600  | 1.32577900  | -2.48379400 |
| H | 3.40988800  | 2.40721100  | -2.65457300 |
| C | 3.91785700  | -1.41402600 | 1.91933100  |
| H | 3.90335600  | -1.07257500 | 2.96281400  |
| C | -4.07126500 | -1.07841400 | 1.33660100  |
| H | -3.34082100 | -1.81964100 | 0.99947000  |
| C | -2.24453700 | 1.34592800  | -2.77491900 |
| H | -1.46100800 | 0.58447200  | -2.71861500 |
| C | -4.61337300 | 3.91452100  | 0.89162100  |
| H | -5.34463400 | 3.68393000  | 1.67820400  |
| C | 4.51943200  | 3.54959600  | 1.84972500  |
| H | 4.65823000  | 3.27517600  | 2.90386900  |
| C | -3.85423900 | -0.87074400 | 2.84099100  |
| H | -3.82623800 | -1.84115200 | 3.34993500  |
| H | -2.90770400 | -0.35853600 | 3.03535900  |
| H | -4.66392800 | -0.28451800 | 3.29248800  |
| C | -5.47092200 | -1.65596600 | 1.08118800  |
| H | -6.24449300 | -0.94275500 | 1.39273100  |
| H | -5.62124800 | -1.87691300 | 0.01998500  |
| H | -5.61640300 | -2.58372900 | 1.64782500  |
| C | -3.22775300 | 0.93209700  | -3.88197800 |
| H | -4.03585500 | 1.66996500  | -3.97033600 |
| H | -2.71607500 | 0.87400700  | -4.85060000 |
| H | -3.67351300 | -0.04488600 | -3.67036200 |
| C | -1.56484500 | 2.67100000  | -3.13210700 |
| H | -0.92739400 | 2.52654400  | -4.01299800 |
| H | -2.29833800 | 3.44613300  | -3.39087000 |
| H | -0.94507000 | 3.02595600  | -2.30349300 |
| C | -3.42028500 | 4.62261300  | 1.55374200  |
| H | -3.73001700 | 5.57380500  | 2.00347200  |
| H | -2.98366200 | 3.99518100  | 2.33797500  |
| H | -2.62937300 | 4.82257000  | 0.82143800  |
| C | -5.30183300 | 4.83514500  | -0.12277600 |
| H | -4.60176700 | 5.17606900  | -0.89385300 |
| H | -6.13396000 | 4.32629300  | -0.62175500 |

|    |             |             |             |
|----|-------------|-------------|-------------|
| H  | -5.69591900 | 5.72634700  | 0.37881700  |
| C  | 5.29905300  | -2.04818000 | 1.68545900  |
| H  | 5.45925000  | -2.88221200 | 2.37957600  |
| H  | 5.37322600  | -2.43672100 | 0.66431100  |
| H  | 6.10203100  | -1.31760900 | 1.83466000  |
| C  | 2.81743600  | -2.47578400 | 1.80843700  |
| H  | 1.82751500  | -2.02095000 | 1.83383300  |
| H  | 2.89755000  | -3.05723900 | 0.88728200  |
| H  | 2.90260100  | -3.16738500 | 2.65616300  |
| C  | 5.83610500  | 4.16057500  | 1.35083200  |
| H  | 6.09346600  | 5.05469800  | 1.93082200  |
| H  | 6.66094500  | 3.44456100  | 1.43628300  |
| H  | 5.75337200  | 4.45614700  | 0.29815400  |
| C  | 3.37376100  | 4.56850300  | 1.77851500  |
| H  | 3.24363200  | 4.93974900  | 0.75510200  |
| H  | 2.42312100  | 4.11954100  | 2.08395400  |
| H  | 3.58742100  | 5.43062800  | 2.42180700  |
| C  | 1.97858900  | 0.90969300  | -3.07908300 |
| H  | 1.85239100  | -0.17522700 | -3.09673400 |
| H  | 1.15041200  | 1.34618500  | -2.51239200 |
| H  | 1.92018600  | 1.27552800  | -4.11255000 |
| C  | 4.49197100  | 0.68124700  | -3.25844300 |
| H  | 5.45998400  | 1.02720100  | -2.87792600 |
| H  | 4.45673000  | -0.40862200 | -3.17139400 |
| H  | 4.42866900  | 0.94178000  | -4.32204000 |
| C  | -0.02919300 | 0.35343800  | 2.19125400  |
| O  | 0.13502600  | 1.95306300  | -0.38546700 |
| C  | -0.33107200 | -0.81278500 | 2.41913600  |
| H  | 0.10978100  | 1.58890400  | 1.97167700  |
| C  | 0.11076800  | 3.04285500  | 0.36584500  |
| C  | -0.67483100 | -2.16370300 | 2.76187500  |
| O  | 0.17539700  | 2.88365800  | 1.65846700  |
| O  | 0.03221200  | 4.16550300  | -0.16981600 |
| C  | -1.02094500 | -3.09087000 | 1.76876900  |
| C  | -0.67249000 | -2.56765000 | 4.10538600  |
| C  | -1.36368500 | -4.39257900 | 2.11709300  |
| H  | -1.02517600 | -2.77201400 | 0.73226900  |
| C  | -1.01741000 | -3.87144800 | 4.44560100  |
| H  | -0.40230200 | -1.85199200 | 4.87580100  |
| C  | -1.36523600 | -4.78806000 | 3.45397800  |
| H  | -1.63137500 | -5.09957600 | 1.33715300  |
| H  | -1.01432000 | -4.17234300 | 5.48933000  |
| Fe | 0.23703500  | 0.05675200  | -0.14409400 |
| H  | -1.63280900 | -5.80607000 | 3.72187000  |

<sup>T</sup>Ts2

| ATOM | X           | Y           | Z           |
|------|-------------|-------------|-------------|
| Fe   | -0.13776400 | 0.57242200  | 0.50932500  |
| N    | 1.10797300  | 1.98000500  | -0.46515300 |
| N    | -1.57118100 | 1.91744700  | -0.26099500 |
| C    | 3.17701800  | 0.69013700  | -0.42537800 |
| C    | 3.82801900  | 0.49493700  | 0.80542800  |
| C    | 4.62332600  | -0.63835600 | 0.97386800  |
| H    | 5.14099900  | -0.78290500 | 1.91918200  |
| C    | 4.77687200  | -1.58656200 | -0.03790000 |
| C    | 4.08260100  | -1.39323600 | -1.22874000 |
| H    | 4.17033200  | -2.14292600 | -2.01160600 |
| C    | 3.27013400  | -0.27779600 | -1.43908400 |
| C    | 2.43698800  | 1.96549700  | -0.68428100 |
| C    | 3.13371100  | 3.07093400  | -1.15506400 |
| H    | 4.20231800  | 2.99192900  | -1.32281300 |
| C    | 2.44623800  | 4.27452900  | -1.40555800 |
| H    | 2.97895200  | 5.15354200  | -1.75863600 |
| C    | 1.07404800  | 4.32156500  | -1.21816800 |
| C    | 0.26760000  | 5.49191900  | -1.47882500 |
| H    | 0.77194100  | 6.40066700  | -1.79825600 |
| C    | -1.08011900 | 5.46685900  | -1.34715300 |
| H    | -1.67012800 | 6.35514600  | -1.55966400 |
| C    | -1.77346400 | 4.26511900  | -0.94856900 |
| C    | -3.15357700 | 4.15705100  | -0.87444500 |
| H    | -3.77866900 | 5.01708700  | -1.10064700 |
| C    | -3.73401300 | 2.91695200  | -0.55199700 |
| H    | -4.81026600 | 2.78386000  | -0.55728900 |
| C    | -2.91245400 | 1.83129000  | -0.27011600 |
| C    | -0.98780000 | 3.11173100  | -0.64340400 |
| C    | 0.41157700  | 3.14007400  | -0.76672100 |
| C    | -3.48568100 | 0.46432100  | -0.07008900 |
| C    | -3.58383600 | -0.38302800 | -1.19021000 |
| C    | -4.10817700 | -1.66305300 | -1.01945600 |
| H    | -4.17609800 | -2.32399200 | -1.88082000 |
| C    | -4.53056000 | -2.12550000 | 0.22718300  |
| C    | -4.41396100 | -1.26977000 | 1.31945600  |
| H    | -4.73388000 | -1.62666000 | 2.29533000  |
| C    | -3.88900400 | 0.01923000  | 1.19792800  |
| C    | -3.08519600 | 0.04847500  | -2.56317200 |
| C    | -3.77190400 | 0.92143800  | 2.41764900  |
| H    | -2.99087200 | 1.66008600  | 2.20557400  |
| C    | 3.68338400  | 1.50181300  | 1.93755900  |

|   |             |             |             |
|---|-------------|-------------|-------------|
| C | 2.53158800  | -0.11512500 | -2.75981800 |
| H | 1.77723500  | 0.66668200  | -2.62563300 |
| C | 5.68104300  | -2.79370800 | 0.14395200  |
| H | 5.56391500  | -3.42471500 | -0.74675900 |
| C | -5.10983200 | -3.51993700 | 0.38988700  |
| H | -5.30296100 | -3.67099900 | 1.45969300  |
| C | 4.90625000  | 2.42663400  | 2.00842200  |
| H | 4.78584700  | 3.16809600  | 2.80696800  |
| H | 5.81581900  | 1.84928300  | 2.21508900  |
| H | 5.04921100  | 2.96090400  | 1.06352200  |
| C | 3.49345700  | 0.34954800  | -3.86173900 |
| H | 4.27899500  | -0.39720100 | -4.03113700 |
| H | 2.95875500  | 0.49955000  | -4.80691700 |
| H | 3.97473900  | 1.29417700  | -3.58583400 |
| C | 1.78367900  | -1.38920200 | -3.17364600 |
| H | 1.16738900  | -1.18846700 | -4.05754500 |
| H | 2.47349700  | -2.20142500 | -3.43074200 |
| H | 1.13002500  | -1.74399900 | -2.37038600 |
| C | 7.15365200  | -2.36567300 | 0.22122200  |
| H | 7.80954100  | -3.24104800 | 0.29153500  |
| H | 7.44228400  | -1.78978900 | -0.66461300 |
| H | 7.33062300  | -1.73938300 | 1.10373300  |
| C | 5.29557100  | -3.63936500 | 1.36465600  |
| H | 5.40568500  | -3.07067600 | 2.29509700  |
| H | 4.25779800  | -3.98272000 | 1.30171200  |
| H | 5.94157700  | -4.52182200 | 1.43563500  |
| C | -3.34344300 | 0.16492800  | 3.68001500  |
| H | -3.08324800 | 0.87831600  | 4.46965600  |
| H | -4.14739500 | -0.47229300 | 4.06686700  |
| H | -2.46987700 | -0.46325900 | 3.48021800  |
| C | -5.08604900 | 1.67819000  | 2.65932600  |
| H | -5.35947400 | 2.28544200  | 1.79032100  |
| H | -5.90314200 | 0.97286200  | 2.85456100  |
| H | -4.99529900 | 2.34275100  | 3.52640800  |
| C | -6.44885700 | -3.65065600 | -0.34945900 |
| H | -6.88659800 | -4.64225200 | -0.18719900 |
| H | -7.16492900 | -2.89781000 | -0.00306100 |
| H | -6.31250800 | -3.51482000 | -1.42894400 |
| C | -4.12647300 | -4.60794300 | -0.06180800 |
| H | -3.91243700 | -4.52586700 | -1.13416800 |
| H | -3.17546000 | -4.53188300 | 0.47482900  |
| H | -4.54803000 | -5.60334600 | 0.11821400  |
| C | -1.75392700 | -0.64106700 | -2.89053200 |
| H | -1.01495400 | -0.45076000 | -2.10420300 |

|   |             |             |             |
|---|-------------|-------------|-------------|
| H | -1.88013000 | -1.72735400 | -2.97189400 |
| H | -1.35064200 | -0.27180800 | -3.84100700 |
| C | -0.01217600 | -0.65017500 | 1.98240300  |
| C | 0.07581400  | -1.42061000 | 0.96912500  |
| C | 0.29844400  | -2.62976300 | 0.20811200  |
| C | 1.57110700  | -3.22134600 | 0.17690900  |
| C | -0.72668200 | -3.21209900 | -0.55411500 |
| C | 1.81236100  | -4.35229500 | -0.59483800 |
| H | 2.37426000  | -2.75992700 | 0.74248600  |
| C | -0.48472900 | -4.35033900 | -1.31657500 |
| H | -1.71096800 | -2.75303800 | -0.55084200 |
| C | 0.78583800  | -4.92558000 | -1.34532100 |
| H | 2.80967300  | -4.78502800 | -0.61612700 |
| H | -1.29457400 | -4.78699700 | -1.89560700 |
| C | 0.00672100  | 0.56389500  | 3.95508600  |
| O | 0.18474800  | -0.28938800 | 4.75139700  |
| O | -0.16106600 | 1.66556900  | 3.55818000  |
| H | 2.80717200  | 2.12110300  | 1.71751300  |
| C | 3.42895400  | 0.82455400  | 3.28983000  |
| H | 4.32378700  | 0.31283700  | 3.66329900  |
| H | 3.14381200  | 1.57332000  | 4.03712900  |
| H | 2.62228800  | 0.08866800  | 3.21357200  |
| C | -4.12255100 | -0.18855800 | -3.66757100 |
| H | -4.31874700 | -1.25575300 | -3.82184000 |
| H | -5.07327400 | 0.29984100  | -3.42784200 |
| H | -3.75854300 | 0.21902100  | -4.61753000 |
| H | -2.89446200 | 1.12491300  | -2.53175600 |
| H | 0.97475400  | -5.80902100 | -1.94841300 |

<sup>9</sup>Ts2

| ATOM | X           | Y           | Z           |
|------|-------------|-------------|-------------|
| Fe   | -0.15080400 | 0.53564500  | 0.44893000  |
| N    | 1.10416200  | 1.99016800  | -0.46465500 |
| N    | -1.57862500 | 1.91805300  | -0.26070000 |
| C    | 3.17083400  | 0.70146700  | -0.42600000 |
| C    | 3.82962400  | 0.51282700  | 0.80159000  |
| C    | 4.62238500  | -0.62190000 | 0.97289700  |
| H    | 5.14556700  | -0.76130700 | 1.91593000  |
| C    | 4.76505000  | -1.57823700 | -0.03253600 |
| C    | 4.06328400  | -1.39093500 | -1.22001400 |
| H    | 4.14285400  | -2.14692400 | -1.99754200 |
| C    | 3.25393000  | -0.27398100 | -1.43356000 |
| C    | 2.42960200  | 1.97631000  | -0.68573600 |
| C    | 3.12659600  | 3.08497500  | -1.15532200 |

|   |             |             |             |
|---|-------------|-------------|-------------|
| H | 4.19533400  | 3.00866300  | -1.32266800 |
| C | 2.43565300  | 4.28633200  | -1.40064500 |
| H | 2.96652400  | 5.16781000  | -1.75086800 |
| C | 1.06414300  | 4.33208300  | -1.21232000 |
| C | 0.25561000  | 5.50161300  | -1.46816700 |
| H | 0.75744600  | 6.41249100  | -1.78564800 |
| C | -1.09163900 | 5.47351000  | -1.33322600 |
| H | -1.68324200 | 6.36190400  | -1.54108300 |
| C | -1.78433700 | 4.26917900  | -0.93726300 |
| C | -3.16322200 | 4.16072700  | -0.85866200 |
| H | -3.78932600 | 5.02148300  | -1.07928000 |
| C | -3.74363500 | 2.91704100  | -0.53862900 |
| H | -4.81990500 | 2.78392800  | -0.54066600 |
| C | -2.92072800 | 1.83172600  | -0.26551300 |
| C | -0.99543400 | 3.11479200  | -0.63989900 |
| C | 0.40204900  | 3.14717000  | -0.76451900 |
| C | -3.48818500 | 0.46211400  | -0.06654600 |
| C | -3.57745800 | -0.38833100 | -1.18507100 |
| C | -4.09216800 | -1.67219000 | -1.01330400 |
| H | -4.15393800 | -2.33484600 | -1.87388900 |
| C | -4.51385800 | -2.13565200 | 0.23322700  |
| C | -4.40600800 | -1.27705900 | 1.32410400  |
| H | -4.72533600 | -1.63465400 | 2.29994800  |
| C | -3.89013400 | 0.01550000  | 1.20148900  |
| C | -3.08190600 | 0.04546800  | -2.55837100 |
| C | -3.78032600 | 0.91923200  | 2.42071300  |
| H | -3.00836400 | 1.66656700  | 2.20639900  |
| C | 3.69390600  | 1.52588600  | 1.92928500  |
| C | 2.50793500  | -0.11754100 | -2.75094300 |
| H | 1.74607200  | 0.65632700  | -2.61248400 |
| C | 5.66757200  | -2.78656600 | 0.14988900  |
| H | 5.52849900  | -3.43141500 | -0.72766100 |
| C | -5.08455200 | -3.53347500 | 0.39740700  |
| H | -5.27660500 | -3.68447600 | 1.46742600  |
| C | 4.92414000  | 2.44113200  | 1.99585000  |
| H | 4.81033200  | 3.18614400  | 2.79203300  |
| H | 5.82940700  | 1.85744900  | 2.20357800  |
| H | 5.07035400  | 2.97121200  | 1.04907300  |
| C | 3.46107600  | 0.35898700  | -3.85553600 |
| H | 4.25304200  | -0.38005500 | -4.02867700 |
| H | 2.92157500  | 0.50539000  | -4.79854600 |
| H | 3.93406100  | 1.30776000  | -3.57957200 |
| C | 1.77199700  | -1.39841500 | -3.16506300 |
| H | 1.14553000  | -1.20050100 | -4.04232500 |

|   |             |             |             |
|---|-------------|-------------|-------------|
| H | 2.46919900  | -2.20070200 | -3.43315600 |
| H | 1.12958200  | -1.76551000 | -2.35822000 |
| C | 7.14295700  | -2.36257600 | 0.18765000  |
| H | 7.79751200  | -3.23862700 | 0.26181500  |
| H | 7.41445700  | -1.80574100 | -0.71559500 |
| H | 7.34010000  | -1.71884900 | 1.05323500  |
| C | 5.30679700  | -3.61176600 | 1.39181500  |
| H | 5.44284700  | -3.03095400 | 2.31121300  |
| H | 4.26595200  | -3.94996200 | 1.35937700  |
| H | 5.94934500  | -4.49695000 | 1.45986500  |
| C | -3.33932200 | 0.16754500  | 3.68166100  |
| H | -3.08758500 | 0.88365100  | 4.47165100  |
| H | -4.13339000 | -0.48131900 | 4.06957000  |
| H | -2.45747100 | -0.44832400 | 3.47956400  |
| C | -5.10227900 | 1.66101100  | 2.66557100  |
| H | -5.38446400 | 2.26450500  | 1.79674400  |
| H | -5.91095600 | 0.94674900  | 2.86342700  |
| H | -5.01681100 | 2.32723100  | 3.53194300  |
| C | -6.42310600 | -3.67256300 | -0.34129100 |
| H | -6.85543200 | -4.66629400 | -0.17756500 |
| H | -7.14305600 | -2.92311900 | 0.00443200  |
| H | -6.28783700 | -3.53732000 | -1.42099100 |
| C | -4.09517200 | -4.61641000 | -0.05312900 |
| H | -3.88111500 | -4.53426500 | -1.12548300 |
| H | -3.14475900 | -4.53470800 | 0.48370900  |
| H | -4.51139300 | -5.61391000 | 0.12771800  |
| C | -1.75080800 | -0.64159100 | -2.89093100 |
| H | -1.00816600 | -0.45073800 | -2.10804300 |
| H | -1.87439600 | -1.72823000 | -2.97162200 |
| H | -1.35141300 | -0.27146600 | -3.84264100 |
| C | -0.00538400 | -0.64003900 | 1.96358300  |
| C | 0.07900300  | -1.42839900 | 0.96348300  |
| C | 0.30992900  | -2.64660800 | 0.21866200  |
| C | 1.58024000  | -3.24377500 | 0.21875400  |
| C | -0.70192300 | -3.23079200 | -0.55936500 |
| C | 1.83227700  | -4.38267600 | -0.53766300 |
| H | 2.37339700  | -2.78032700 | 0.79671900  |
| C | -0.44949300 | -4.37678000 | -1.30705700 |
| H | -1.68424300 | -2.76779800 | -0.57967700 |
| C | 0.81868800  | -4.95764800 | -1.30433800 |
| H | 2.82748500  | -4.82067700 | -0.53351800 |
| H | -1.24896900 | -4.81481400 | -1.89925700 |
| C | 0.00787300  | 0.60489200  | 3.93233500  |
| O | 0.18962800  | -0.24082100 | 4.73535900  |

|   |             |             |             |
|---|-------------|-------------|-------------|
| O | -0.16519500 | 1.69844300  | 3.51800500  |
| H | 2.82263300  | 2.15137400  | 1.70771500  |
| C | 3.43475300  | 0.85505300  | 3.28392400  |
| H | 4.32582300  | 0.33768300  | 3.65860100  |
| H | 3.15551400  | 1.60814600  | 4.02910500  |
| H | 2.62276900  | 0.12478900  | 3.21000700  |
| C | -4.12187400 | -0.19210300 | -3.66026400 |
| H | -4.31825500 | -1.25942500 | -3.81349600 |
| H | -5.07198200 | 0.29608100  | -3.41776700 |
| H | -3.76078200 | 0.21548800  | -4.61133300 |
| H | -2.89289600 | 1.12214400  | -2.52582600 |
| H | 1.01584200  | -5.84744000 | -1.89534700 |

MECP

| ATOM | X           | Y           | Z           |
|------|-------------|-------------|-------------|
| Fe   | 0.18398461  | -0.31302809 | 0.03230475  |
| N    | 1.26848574  | -1.48934164 | -1.34405861 |
| N    | -1.45153955 | -1.44005611 | -1.17234819 |
| C    | 3.34157620  | -0.41722832 | -0.55210344 |
| C    | 3.72262788  | 0.53758558  | -1.51962363 |
| C    | 4.46155108  | 1.65085256  | -1.12457146 |
| H    | 4.76337355  | 2.37428831  | -1.87594739 |
| C    | 4.83207755  | 1.85549449  | 0.20520248  |
| C    | 4.44050228  | 0.90734765  | 1.14486050  |
| H    | 4.72482513  | 1.05835333  | 2.18368270  |
| C    | 3.69699165  | -0.22507382 | 0.79862621  |
| C    | 2.60257540  | -1.64833809 | -0.97948769 |
| C    | 3.25941027  | -2.84822723 | -1.11079050 |
| H    | 4.32031966  | -2.89334201 | -0.88456142 |
| C    | 2.58248821  | -3.99456966 | -1.58382878 |
| H    | 3.10383138  | -4.93506450 | -1.73197722 |
| C    | 1.19150333  | -3.91053551 | -1.79087923 |
| C    | 0.39110333  | -5.03303493 | -2.19104970 |
| H    | 0.89807508  | -5.97501616 | -2.38489483 |
| C    | -0.96245125 | -4.94068526 | -2.33329734 |
| H    | -1.54833344 | -5.79871530 | -2.65203534 |
| C    | -1.63194309 | -3.72189575 | -2.02874589 |
| C    | -3.02488110 | -3.56030806 | -2.09095182 |
| H    | -3.64510080 | -4.38209308 | -2.43953866 |
| C    | -3.59440766 | -2.36822155 | -1.70051387 |
| H    | -4.66564935 | -2.21213902 | -1.75587100 |
| C    | -2.77072238 | -1.33530699 | -1.19294129 |
| C    | -0.86092808 | -2.59754684 | -1.61356555 |
| C    | 0.55611987  | -2.66217538 | -1.58170250 |

|   |             |             |             |
|---|-------------|-------------|-------------|
| C | -3.41016653 | -0.08471713 | -0.66952838 |
| C | -3.96241877 | -0.07192184 | 0.62352378  |
| C | -4.59299686 | 1.09240012  | 1.06846885  |
| H | -5.02700528 | 1.11470279  | 2.06457055  |
| C | -4.68052636 | 2.23496780  | 0.27994962  |
| C | -4.12068979 | 2.19716373  | -0.99729295 |
| H | -4.18793727 | 3.07922401  | -1.62832792 |
| C | -3.49465890 | 1.05473176  | -1.49408888 |
| C | -3.90873332 | -1.29102004 | 1.53744178  |
| H | -3.04656605 | -1.89712383 | 1.23554007  |
| C | -3.00531915 | 1.02017650  | -2.93596681 |
| H | -2.17719757 | 0.30669222  | -2.98976787 |
| C | 3.42095127  | 0.31571604  | -2.99557526 |
| H | 2.54427425  | -0.33550286 | -3.05850971 |
| C | 3.32311040  | -1.22182697 | 1.88872719  |
| H | 2.52559303  | -1.86351296 | 1.50027036  |
| C | 5.66988970  | 3.04790039  | 0.63360478  |
| H | 5.52284800  | 3.17173214  | 1.71457476  |
| C | -5.36811142 | 3.48405572  | 0.80158655  |
| H | -5.76906526 | 3.24361907  | 1.79457602  |
| C | -0.87038186 | 0.53398359  | 1.43304273  |
| H | -1.44299419 | 1.43131803  | 1.60683610  |
| C | -0.46350275 | -0.60733501 | 1.82102938  |
| C | 0.27418411  | 1.96741713  | -0.88397716 |
| C | 0.23044795  | 1.12992964  | -1.76641389 |
| H | 0.24315211  | 0.51149777  | -2.63705362 |
| C | 0.33638938  | 3.07843948  | 0.02266451  |
| C | -0.76139719 | 3.93704650  | 0.15758124  |
| C | 1.50295116  | 3.30953418  | 0.76240608  |
| C | -0.67836741 | 5.03225141  | 1.01189373  |
| H | -1.67136251 | 3.73688804  | -0.40059659 |
| C | 1.57321129  | 4.40303904  | 1.61728051  |
| H | 2.34240738  | 2.62883851  | 0.65959348  |
| C | 0.48655053  | 5.26918123  | 1.73897743  |
| H | -1.52697389 | 5.70253001  | 1.10853048  |
| H | 2.47916624  | 4.57916031  | 2.18941884  |
| C | -0.31665603 | -1.72600563 | 2.73547949  |
| C | -0.49544264 | -1.55622098 | 4.11523469  |
| C | 0.01606857  | -2.99429389 | 2.24208652  |
| C | -0.34683143 | -2.63481860 | 4.97996697  |
| H | -0.74408824 | -0.57261852 | 4.50157890  |
| C | 0.16000216  | -4.07266612 | 3.10877095  |
| H | 0.15849085  | -3.12869176 | 1.17258993  |
| C | -0.02028557 | -3.89545624 | 4.47905144  |

|   |             |             |             |
|---|-------------|-------------|-------------|
| H | -0.48553195 | -2.49304638 | 6.04776347  |
| H | 0.41431961  | -5.05105146 | 2.71242060  |
| C | -5.17565491 | -2.14912993 | 1.39116586  |
| H | -6.06370563 | -1.56400107 | 1.65917850  |
| H | -5.30635741 | -2.51657669 | 0.37043518  |
| H | -5.12654804 | -3.01604215 | 2.06013862  |
| C | -3.71704589 | -0.92686409 | 3.01561072  |
| H | -2.91308685 | -0.19855527 | 3.14916809  |
| H | -4.63341022 | -0.51099244 | 3.45032622  |
| H | -3.46111685 | -1.82434044 | 3.58800545  |
| C | -2.48653210 | 2.36741573  | -3.44969548 |
| H | -1.99987857 | 2.22902031  | -4.42123432 |
| H | -3.29935422 | 3.08821767  | -3.59489516 |
| H | -1.75591561 | 2.80513906  | -2.76324321 |
| C | -4.12537586 | 0.50437414  | -3.85461855 |
| H | -4.45832195 | -0.49500825 | -3.55795105 |
| H | -4.99010909 | 1.17765748  | -3.81524221 |
| H | -3.77887012 | 0.45385045  | -4.89311040 |
| C | -6.54771759 | 3.90267689  | -0.08593461 |
| H | -6.20850746 | 4.18751644  | -1.08861643 |
| H | -7.27018071 | 3.08679234  | -0.19288398 |
| H | -7.06529046 | 4.76544469  | 0.34821226  |
| C | -4.37156483 | 4.63791906  | 0.97248821  |
| H | -4.86423950 | 5.51349763  | 1.40989514  |
| H | -3.54409030 | 4.34469192  | 1.62711852  |
| H | -3.94998783 | 4.93864578  | 0.00530723  |
| C | 4.51201432  | -2.12927447 | 2.23591286  |
| H | 5.35216328  | -1.53719089 | 2.61899063  |
| H | 4.22562527  | -2.85192200 | 3.00898769  |
| H | 4.85985710  | -2.68599870 | 1.36055359  |
| C | 2.79174531  | -0.54565779 | 3.15851618  |
| H | 2.39188413  | -1.30375523 | 3.84013088  |
| H | 3.58100930  | -0.00418518 | 3.69249345  |
| H | 1.98604145  | 0.15926550  | 2.92835296  |
| C | 4.59593297  | -0.41586612 | -3.66285945 |
| H | 4.37624548  | -0.61715927 | -4.71794949 |
| H | 5.50568156  | 0.19536585  | -3.61557552 |
| H | 4.79763956  | -1.37026162 | -3.16552507 |
| C | 3.09173077  | 1.60597186  | -3.75562901 |
| H | 2.71557058  | 1.36162339  | -4.75531001 |
| H | 2.32790090  | 2.19244361  | -3.23491228 |
| H | 3.97611509  | 2.23982264  | -3.88927363 |
| C | 7.16144113  | 2.76443186  | 0.39921155  |
| H | 7.77542337  | 3.60061401  | 0.75219932  |

|   |            |             |             |
|---|------------|-------------|-------------|
| H | 7.47761269 | 1.85858463  | 0.92753485  |
| H | 7.36230636 | 2.62108689  | -0.66936017 |
| C | 5.25050343 | 4.35751358  | -0.04293816 |
| H | 5.46685900 | 4.34283421  | -1.11702339 |
| H | 4.17938893 | 4.54791761  | 0.08349047  |
| H | 5.80237399 | 5.19891623  | 0.39030871  |
| H | 0.54582002 | 6.12598414  | 2.40279672  |
| H | 0.09388474 | -4.73677416 | 5.15596228  |

<sup>Q</sup>In7

| ATOM | X           | Y           | Z           |
|------|-------------|-------------|-------------|
| Fe   | -0.46001000 | -0.57359800 | -0.54875000 |
| N    | 0.26990000  | -2.44173500 | 0.12650400  |
| N    | -2.16968200 | -1.35789500 | 0.39824400  |
| C    | 2.62845200  | -1.93268700 | -0.04507600 |
| C    | 3.31093900  | -1.74584100 | -1.26504000 |
| C    | 4.27753100  | -0.73827500 | -1.33468400 |
| H    | 4.79144800  | -0.58341000 | -2.28162600 |
| C    | 4.60877800  | 0.06447400  | -0.24444700 |
| C    | 3.95153000  | -0.17289900 | 0.95670300  |
| H    | 4.21526600  | 0.42885300  | 1.82259700  |
| C    | 2.95724900  | -1.14251000 | 1.07531600  |
| C    | 1.53104900  | -2.93444600 | 0.14465700  |
| C    | 1.80253600  | -4.25354200 | 0.46299500  |
| H    | 2.83299800  | -4.58795200 | 0.50438100  |
| C    | 0.74441500  | -5.13660800 | 0.77645500  |
| H    | 0.94560700  | -6.17817200 | 1.01132900  |
| C    | -0.55001000 | -4.64640200 | 0.83406700  |
| C    | -1.69797800 | -5.43518200 | 1.22523700  |
| H    | -1.54487300 | -6.49200200 | 1.42921200  |
| C    | -2.92853600 | -4.88372300 | 1.35868700  |
| H    | -3.77378400 | -5.49274100 | 1.66957100  |
| C    | -3.15035100 | -3.48069800 | 1.11018900  |
| C    | -4.36585700 | -2.83799500 | 1.29011100  |
| H    | -5.23061800 | -3.40034500 | 1.63276300  |
| C    | -4.47033000 | -1.46045600 | 1.04123000  |
| H    | -5.40445000 | -0.93342800 | 1.19771900  |
| C    | -3.35498800 | -0.76259700 | 0.58340500  |
| C    | -2.03636700 | -2.70027900 | 0.67667400  |
| C    | -0.76259800 | -3.26930100 | 0.53067100  |
| C    | -3.38896600 | 0.69838200  | 0.26605300  |
| C    | -2.85804300 | 1.61961400  | 1.19166500  |
| C    | -2.82262100 | 2.96627100  | 0.84293600  |
| H    | -2.39551700 | 3.68098700  | 1.53975700  |

|   |             |             |             |
|---|-------------|-------------|-------------|
| C | -3.27077800 | 3.41921600  | -0.39800900 |
| C | -3.80092200 | 2.49116900  | -1.28853600 |
| H | -4.15042500 | 2.83883400  | -2.25761200 |
| C | -3.86579900 | 1.12885100  | -0.98366000 |
| C | -2.34680400 | 1.15950700  | 2.55147700  |
| H | -1.91601100 | 0.16123900  | 2.41855300  |
| C | -4.45622200 | 0.14704100  | -1.98776800 |
| H | -4.06349300 | -0.84780600 | -1.75379100 |
| C | 3.12378700  | -2.59385800 | -2.52253100 |
| C | 2.29886000  | -1.36700400 | 2.43168400  |
| H | 1.36237000  | -1.90576500 | 2.27013000  |
| C | 5.66036000  | 1.15418800  | -0.35115200 |
| H | 5.68524500  | 1.67448900  | 0.61508800  |
| C | -3.09921400 | 4.87233500  | -0.80198500 |
| H | -3.62179000 | 5.01237300  | -1.75710400 |
| C | 3.78245100  | -3.97597300 | -2.38850800 |
| H | 3.82790000  | -4.46670700 | -3.36777300 |
| H | 4.80343200  | -3.89146000 | -2.00016800 |
| H | 3.20962300  | -4.62049100 | -1.71619700 |
| C | 3.19616900  | -2.25016400 | 3.31093600  |
| H | 4.16193000  | -1.76239000 | 3.49209000  |
| H | 2.72214100  | -2.43783000 | 4.28158400  |
| H | 3.38620900  | -3.21546100 | 2.82917800  |
| C | 7.05309200  | 0.55972500  | -0.60214900 |
| H | 7.81405300  | 1.34844500  | -0.61514800 |
| H | 7.32040000  | -0.16296800 | 0.17630100  |
| H | 7.08896800  | 0.04288200  | -1.56867200 |
| C | 5.30379100  | 2.19471700  | -1.42023000 |
| H | 5.27929300  | 1.74306800  | -2.41911100 |
| H | 4.32506200  | 2.64197800  | -1.22142600 |
| H | 6.05047700  | 2.99706300  | -1.43436200 |
| C | -4.06299400 | 0.44772000  | -3.43910600 |
| H | -4.38780100 | -0.37565800 | -4.08481000 |
| H | -4.54120100 | 1.36121800  | -3.81163900 |
| H | -2.97934800 | 0.55452700  | -3.54046400 |
| C | -5.98552900 | 0.09747800  | -1.85054800 |
| H | -6.28758100 | -0.18632700 | -0.83771600 |
| H | -6.42253700 | 1.07894300  | -2.07183100 |
| H | -6.41068900 | -0.63029500 | -2.55147600 |
| C | -3.70874900 | 5.84890700  | 0.21073700  |
| H | -3.61157900 | 6.87958300  | -0.14846700 |
| H | -4.77168300 | 5.64012100  | 0.37217900  |
| H | -3.20097800 | 5.78714200  | 1.18004100  |
| C | -1.61089000 | 5.17673100  | -1.03637400 |

|   |             |             |             |
|---|-------------|-------------|-------------|
| H | -1.03732200 | 5.05527200  | -0.10978400 |
| H | -1.18770900 | 4.49323200  | -1.78041000 |
| H | -1.47258600 | 6.20477300  | -1.39061000 |
| C | -3.50862800 | 1.04231700  | 3.55054900  |
| H | -3.98054500 | 2.02055500  | 3.70426100  |
| H | -4.27343000 | 0.34577800  | 3.19241700  |
| H | -3.14588700 | 0.68234600  | 4.52050600  |
| C | -1.23791100 | 2.05094500  | 3.11990000  |
| H | -0.45225600 | 2.21417700  | 2.37546200  |
| H | -1.62408300 | 3.02484400  | 3.44448500  |
| H | -0.79075500 | 1.57009800  | 3.99699200  |
| C | 0.48765800  | 1.17773700  | -0.13548600 |
| C | 1.17904400  | 2.17879000  | 0.03666300  |
| C | 2.05691500  | 3.28935100  | 0.25073200  |
| C | 2.93563000  | 3.29942900  | 1.34784900  |
| C | 2.09675600  | 4.36976000  | -0.64724400 |
| C | 3.83606700  | 4.34328200  | 1.52703700  |
| H | 2.90879600  | 2.47098600  | 2.04772800  |
| C | 2.99868600  | 5.41313600  | -0.46235500 |
| H | 1.42045400  | 4.37431300  | -1.49687700 |
| C | 3.87567600  | 5.40293900  | 0.62119000  |
| H | 4.51391500  | 4.32829300  | 2.37609200  |
| H | 3.01931000  | 6.23542900  | -1.17203600 |
| C | 1.68283400  | -2.71642500 | -3.02402500 |
| H | 1.05027400  | -3.28268400 | -2.33606900 |
| H | 1.23308700  | -1.72982200 | -3.16350900 |
| H | 1.67321400  | -3.23442400 | -3.99045900 |
| H | 3.67701900  | -2.06560500 | -3.30967800 |
| H | 4.58435200  | 6.21430000  | 0.75915700  |
| C | -1.18837600 | -1.25394200 | -2.31203200 |
| O | -1.77902300 | -2.22370600 | -2.74005100 |
| O | -0.74533200 | -0.16056200 | -2.72051100 |
| C | 1.93482300  | -0.06186000 | 3.14815200  |
| H | 1.36509000  | 0.59471100  | 2.48356900  |
| H | 1.32637300  | -0.27966000 | 4.03374900  |
| H | 2.82448500  | 0.47959800  | 3.49260900  |

<sup>Q</sup>In8

| ATOM | X          | Y           | Z           |
|------|------------|-------------|-------------|
| Fe   | 1.06187400 | -0.33941700 | 0.04707600  |
| N    | 3.07221300 | -0.07479600 | -0.21871000 |
| N    | 1.57430900 | -2.23982400 | -0.08661500 |
| C    | 2.99497100 | 2.29648600  | -0.03755400 |
| C    | 2.31917200 | 2.87376800  | -1.13275500 |

|   |             |             |             |
|---|-------------|-------------|-------------|
| C | 1.41399000  | 3.90667800  | -0.89923500 |
| H | 0.88089000  | 4.34388200  | -1.73929300 |
| C | 1.14516100  | 4.37249900  | 0.38964700  |
| C | 1.83420800  | 3.79927000  | 1.45293100  |
| H | 1.62802400  | 4.15230100  | 2.46204300  |
| C | 2.74831000  | 2.75807300  | 1.26558000  |
| C | 3.82404700  | 1.07118900  | -0.24415000 |
| C | 5.18476500  | 1.06246400  | -0.42403700 |
| H | 5.72386800  | 2.00561800  | -0.43258800 |
| C | 5.88014200  | -0.17540300 | -0.57986200 |
| H | 6.95736400  | -0.19451300 | -0.72146300 |
| C | 5.15019200  | -1.37426400 | -0.52661700 |
| C | 5.71148300  | -2.68551100 | -0.63437500 |
| H | 6.78591200  | -2.77849900 | -0.78107700 |
| C | 4.93456100  | -3.81597100 | -0.54908500 |
| H | 5.39775500  | -4.79773100 | -0.62767800 |
| C | 3.52312800  | -3.74330300 | -0.35376200 |
| C | 2.66808800  | -4.85555600 | -0.22891400 |
| H | 3.06964700  | -5.86389500 | -0.28190400 |
| C | 1.28537900  | -4.63314700 | -0.02636200 |
| H | 0.60032800  | -5.47039500 | 0.07502900  |
| C | 0.77767400  | -3.35116100 | 0.03314500  |
| C | 2.95452600  | -2.44134700 | -0.26724300 |
| C | 3.73920600  | -1.29805500 | -0.34191800 |
| C | -0.67377000 | -3.03897300 | 0.20099400  |
| C | -1.16681500 | -2.63121900 | 1.45788300  |
| C | -2.50496300 | -2.26306500 | 1.56981700  |
| H | -2.88833000 | -1.93135700 | 2.53244400  |
| C | -3.37473400 | -2.28082600 | 0.47697000  |
| C | -2.86771700 | -2.69017200 | -0.75193800 |
| H | -3.51919700 | -2.70298700 | -1.62006200 |
| C | -1.52581500 | -3.04503100 | -0.91591400 |
| C | -0.26332500 | -2.63541000 | 2.68350500  |
| H | 0.76876700  | -2.55525300 | 2.32907200  |
| C | -1.01179300 | -3.42216900 | -2.29769800 |
| H | 0.08048500  | -3.36117300 | -2.26672700 |
| C | 2.58828400  | 2.38313600  | -2.54846000 |
| H | 2.92632200  | 1.34488800  | -2.47086100 |
| C | 3.41968400  | 2.12667800  | 2.47611500  |
| H | 4.07748100  | 1.33162900  | 2.11369400  |
| C | 0.07231800  | 5.41783900  | 0.63525300  |
| H | 0.10695800  | 5.67545100  | 1.70193600  |
| C | -4.81997100 | -1.84522500 | 0.67322800  |
| H | -4.78828400 | -0.89859000 | 1.23061900  |

|   |             |             |             |
|---|-------------|-------------|-------------|
| O | -0.58290600 | 0.71210900  | 0.79914200  |
| C | -1.18473300 | 0.71153500  | -0.32134900 |
| O | -0.63387100 | 0.30652900  | -1.37252300 |
| C | -2.56232200 | 1.17298300  | -0.34811800 |
| C | -3.72646200 | 1.50289900  | -0.33760100 |
| C | -5.11540100 | 1.84515300  | -0.31022800 |
| C | -5.81507400 | 2.07031700  | -1.50429200 |
| C | -5.79482100 | 1.91237900  | 0.91483600  |
| C | -7.17532300 | 2.35441900  | -1.46968400 |
| H | -5.28791300 | 2.01129500  | -2.45102800 |
| C | -7.15624700 | 2.19232000  | 0.94059400  |
| H | -5.25050900 | 1.73680500  | 1.83730000  |
| C | -7.84779700 | 2.41309900  | -0.24974100 |
| H | -7.71222500 | 2.52544600  | -2.39744800 |
| H | -7.67803200 | 2.23859400  | 1.89127900  |
| C | -0.39429200 | -3.97162700 | 3.42841700  |
| H | -1.41939600 | -4.11364300 | 3.79268500  |
| H | -0.14588600 | -4.80852100 | 2.76681200  |
| H | 0.28178100  | -4.00341800 | 4.29120400  |
| C | -0.50958400 | -1.45039800 | 3.62385400  |
| H | -1.47110900 | -1.53395000 | 4.14451000  |
| H | 0.27276200  | -1.41334000 | 4.39048400  |
| H | -0.50111300 | -0.50589600 | 3.07030200  |
| C | -5.58480200 | -2.86456800 | 1.53183500  |
| H | -5.09534200 | -3.02381100 | 2.49824400  |
| H | -6.60840500 | -2.52059900 | 1.72038700  |
| H | -5.63956200 | -3.83182000 | 1.01778700  |
| C | -5.57563800 | -1.57889300 | -0.62979900 |
| H | -5.75958100 | -2.50942400 | -1.18075200 |
| H | -6.54680000 | -1.12095100 | -0.41272400 |
| H | -5.02144100 | -0.89748800 | -1.28241900 |
| C | -1.49136200 | -2.45598000 | -3.38866900 |
| H | -0.97170100 | -2.66697300 | -4.33052800 |
| H | -2.56605000 | -2.55972200 | -3.58068700 |
| H | -1.29272800 | -1.41885700 | -3.10163900 |
| C | -1.38402200 | -4.87072400 | -2.64156000 |
| H | -0.97930500 | -5.56632200 | -1.89867700 |
| H | -2.47374000 | -4.99622000 | -2.66724200 |
| H | -0.98724000 | -5.15005900 | -3.62479200 |
| C | 4.29764000  | 3.14242800  | 3.21898300  |
| H | 5.05337000  | 3.56652000  | 2.54872800  |
| H | 3.70091200  | 3.96934700  | 3.62204600  |
| H | 4.81421800  | 2.66265600  | 4.05836200  |
| C | 2.39362500  | 1.48288600  | 3.41876900  |

|   |             |            |             |
|---|-------------|------------|-------------|
| H | 2.89882900  | 1.00014300 | 4.26348300  |
| H | 1.69682100  | 2.22604700 | 3.82451500  |
| H | 1.80514700  | 0.72172600 | 2.89484200  |
| C | 0.30691100  | 6.70646300 | -0.16203500 |
| H | 0.23909000  | 6.52478000 | -1.24091000 |
| H | -0.44810400 | 7.45798000 | 0.09492900  |
| H | 1.29575900  | 7.12770200 | 0.04802300  |
| C | -1.31741100 | 4.83105200 | 0.34298000  |
| H | -2.10528000 | 5.54822200 | 0.60082200  |
| H | -1.41933200 | 4.58472900 | -0.72074900 |
| H | -1.48410400 | 3.91102900 | 0.91314700  |
| C | 3.72684100  | 3.19430100 | -3.18373700 |
| H | 4.63813000  | 3.12237300 | -2.58072400 |
| H | 3.95096600  | 2.82283100 | -4.19067900 |
| H | 3.45023600  | 4.25289900 | -3.26496300 |
| C | 1.34473400  | 2.38813600 | -3.44447800 |
| H | 1.01602100  | 3.40681100 | -3.68326800 |
| H | 1.57137200  | 1.89131000 | -4.39471000 |
| H | 0.51374700  | 1.85828600 | -2.96736400 |
| H | -8.91150500 | 2.62947700 | -0.22639500 |

<sup>9</sup>In9

| ATOM | X          | Y           | Z           |
|------|------------|-------------|-------------|
| Fe   | 0.63628700 | -0.75083500 | 0.38076600  |
| N    | 2.42296000 | -1.17969300 | -0.66226800 |
| N    | 0.17340000 | -2.60184300 | -0.52110300 |
| C    | 3.42023000 | 0.91519400  | -0.10097200 |
| C    | 2.85200700 | 1.97991900  | -0.82260500 |
| C    | 2.62276500 | 3.18906900  | -0.16991200 |
| H    | 2.16741700 | 4.00813900  | -0.72260800 |
| C    | 2.93732000 | 3.36973000  | 1.17728500  |
| C    | 3.52512900 | 2.30926100  | 1.86160400  |
| H    | 3.77782200 | 2.44093800  | 2.91197100  |
| C    | 3.76417900 | 1.07627000  | 1.24982500  |
| C    | 3.53368200 | -0.42912800 | -0.74495800 |
| C    | 4.69185200 | -0.86151700 | -1.38125200 |
| H    | 5.55856800 | -0.21032500 | -1.41520600 |
| C    | 4.71627400 | -2.14335700 | -1.96828100 |
| H    | 5.61329800 | -2.50448800 | -2.46504100 |
| C    | 3.58509000 | -2.94328900 | -1.91370500 |
| C    | 3.48899800 | -4.26713700 | -2.48687700 |
| H    | 4.36338200 | -4.67395100 | -2.98949100 |
| C    | 2.34719400 | -4.99375100 | -2.40931800 |
| H    | 2.29899000 | -5.98617800 | -2.85136300 |

|   |             |             |             |
|---|-------------|-------------|-------------|
| C | 1.16559500  | -4.48296500 | -1.75036500 |
| C | -0.03303200 | -5.17099400 | -1.64539000 |
| H | -0.12896100 | -6.16546200 | -2.07396800 |
| C | -1.12624000 | -4.56685300 | -0.98940200 |
| H | -2.08102200 | -5.07418000 | -0.90400900 |
| C | -0.97745900 | -3.29297200 | -0.45424000 |
| C | 1.24698700  | -3.17878600 | -1.17416700 |
| C | 2.42848700  | -2.42907800 | -1.25195300 |
| C | -2.10164900 | -2.57701000 | 0.22316500  |
| C | -2.24615100 | -2.64992600 | 1.61736300  |
| C | -3.24307300 | -1.88675300 | 2.22945300  |
| H | -3.36136800 | -1.93319700 | 3.31004600  |
| C | -4.07825800 | -1.04377000 | 1.50054900  |
| C | -3.92324500 | -1.00221600 | 0.11514300  |
| H | -4.56462500 | -0.34759700 | -0.47151500 |
| C | -2.94673100 | -1.75142900 | -0.53873200 |
| C | -1.34452300 | -3.53608800 | 2.46346700  |
| H | -0.52767100 | -3.88766200 | 1.82547400  |
| C | -2.80023700 | -1.63641500 | -2.04891400 |
| H | -1.95050600 | -2.25363600 | -2.35527500 |
| C | 2.47842500  | 1.83820700  | -2.29040100 |
| H | 2.65525400  | 0.80022500  | -2.58655600 |
| C | 4.36803000  | -0.06162000 | 2.05904100  |
| H | 4.37566700  | -0.95519000 | 1.42714600  |
| C | 2.61462500  | 4.67299000  | 1.88599100  |
| H | 2.99534500  | 4.58951400  | 2.91217500  |
| C | -5.10563600 | -0.17056900 | 2.19899000  |
| H | -5.05050700 | -0.39725300 | 3.27169200  |
| O | -1.08504800 | 1.97998600  | 2.98218700  |
| C | -0.79926200 | 1.49763900  | 1.88338200  |
| O | -0.01633600 | 0.50715600  | 1.68640300  |
| C | -1.41379800 | 2.11159300  | 0.69308200  |
| C | -2.00926300 | 2.66439100  | -0.20598800 |
| C | -2.77254900 | 3.33376200  | -1.21632800 |
| C | -2.45737300 | 3.20456000  | -2.57679500 |
| C | -3.86928500 | 4.12490000  | -0.83901400 |
| C | -3.22486200 | 3.85383400  | -3.53717500 |
| H | -1.61741300 | 2.58571100  | -2.87212300 |
| C | -4.63424300 | 4.76909300  | -1.80486500 |
| H | -4.11166100 | 4.22586300  | 0.21432300  |
| C | -4.31399200 | 4.63573500  | -3.15515400 |
| H | -2.97501100 | 3.74424500  | -4.58804400 |
| H | -5.48181000 | 5.37677400  | -1.50278100 |
| C | -2.11107700 | -4.77181000 | 2.95435900  |

|   |             |             |             |
|---|-------------|-------------|-------------|
| H | -2.95396600 | -4.48064800 | 3.59290500  |
| H | -2.50807700 | -5.34540800 | 2.10953600  |
| H | -1.45540600 | -5.42809600 | 3.53836800  |
| C | -0.70569900 | -2.77250900 | 3.63063400  |
| H | -1.45256500 | -2.46274300 | 4.37086500  |
| H | 0.02312900  | -3.40987600 | 4.14426900  |
| H | -0.19194500 | -1.87495100 | 3.26991300  |
| C | -6.53346800 | -0.48187600 | 1.73135100  |
| H | -6.77506500 | -1.53958500 | 1.88175200  |
| H | -7.25982400 | 0.11991100  | 2.28933000  |
| H | -6.65948400 | -0.25505100 | 0.66616400  |
| C | -4.77741000 | 1.31964100  | 2.02352600  |
| H | -4.82096200 | 1.60940100  | 0.96657500  |
| H | -5.49778200 | 1.93745300  | 2.57268900  |
| H | -3.77174000 | 1.54964700  | 2.39030500  |
| C | -2.49259400 | -0.19504500 | -2.46833300 |
| H | -2.30279500 | -0.13716100 | -3.54664900 |
| H | -3.32676400 | 0.47774700  | -2.23997400 |
| H | -1.61030500 | 0.18092600  | -1.93837700 |
| C | -4.04099000 | -2.17724800 | -2.77090500 |
| H | -4.22156000 | -3.22527500 | -2.50756000 |
| H | -4.93665300 | -1.60246600 | -2.50638400 |
| H | -3.91019100 | -2.11443500 | -3.85739500 |
| C | 5.82382900  | 0.24665800  | 2.43377800  |
| H | 6.42542600  | 0.43473300  | 1.53761300  |
| H | 5.88649200  | 1.13349900  | 3.07590300  |
| H | 6.26942000  | -0.59517400 | 2.97614700  |
| C | 3.52785100  | -0.39240700 | 3.29932500  |
| H | 3.93422500  | -1.27455400 | 3.80724300  |
| H | 3.52614900  | 0.43494400  | 4.01862600  |
| H | 2.48943300  | -0.60026200 | 3.01905900  |
| C | 3.30941700  | 5.87185800  | 1.22706900  |
| H | 2.94261500  | 6.02845900  | 0.20588000  |
| H | 3.11407900  | 6.78910400  | 1.79411000  |
| H | 4.39328200  | 5.72231300  | 1.17685400  |
| C | 1.09633300  | 4.89132300  | 1.96641000  |
| H | 0.86911600  | 5.81000600  | 2.51995400  |
| H | 0.66182300  | 4.98780700  | 0.96400300  |
| H | 0.59738100  | 4.05405200  | 2.46531300  |
| C | 3.36933600  | 2.72486000  | -3.17045900 |
| H | 4.42837400  | 2.49122300  | -3.01520700 |
| H | 3.13649300  | 2.57393800  | -4.23085600 |
| H | 3.21994100  | 3.78656400  | -2.94018000 |
| C | 0.99261300  | 2.13033500  | -2.52754700 |

|                               |             |             |             |
|-------------------------------|-------------|-------------|-------------|
| H                             | 0.74749800  | 3.17697500  | -2.31056400 |
| H                             | 0.72720600  | 1.93394900  | -3.57339800 |
| H                             | 0.36841600  | 1.50056900  | -1.88324500 |
| H                             | -4.91239400 | 5.13967900  | -3.90817700 |
| CO <sub>2</sub>               |             |             |             |
| ATOM                          | X           | Y           | Z           |
| C                             | 0.00000000  | 0.00000000  | 0.00000000  |
| O                             | 0.00000000  | 0.00000000  | 1.16509200  |
| O                             | 0.00000000  | 0.00000000  | -1.16509200 |
| CO <sub>3</sub> <sup>2-</sup> |             |             |             |
| ATOM                          | X           | Y           | Z           |
| C                             | 0.00000000  | 0.00000000  | -0.00055500 |
| O                             | 0.00000000  | 0.00000000  | 1.29821500  |
| O                             | 0.00000000  | 1.12525000  | -0.64889900 |
| O                             | 0.00000000  | -1.12525000 | -0.64889900 |
| HCO <sub>3</sub> <sup>-</sup> |             |             |             |
| ATOM                          | X           | Y           | Z           |
| C                             | 0.00000000  | 0.15355800  | 0.00000000  |
| O                             | 1.21678700  | 0.44146500  | 0.00000000  |
| O                             | -1.00900600 | 0.87799200  | 0.00000000  |
| O                             | -0.28176000 | -1.22929900 | 0.00000000  |
| H                             | 0.59182700  | -1.64261200 | 0.00000000  |
| Phenylacetylene               |             |             |             |
| ATOM                          | X           | Y           | Z           |
| C                             | 3.23061400  | -0.00000100 | -0.00000800 |
| H                             | 4.29873700  | -0.00001600 | -0.00011300 |
| C                             | 2.02295100  | 0.00000400  | 0.00001100  |
| C                             | 0.58762900  | -0.00000800 | 0.00008300  |
| C                             | -0.11960000 | -1.21100400 | -0.00000800 |
| C                             | -0.11958700 | 1.21099600  | -0.00000800 |
| C                             | -1.51024300 | -1.20671000 | -0.00002500 |
| H                             | 0.42653600  | -2.14897200 | -0.00004500 |
| C                             | -1.51023100 | 1.20671600  | -0.00002500 |
| H                             | 0.42656200  | 2.14895800  | -0.00004500 |
| C                             | -2.20791600 | 0.00000700  | 0.00003300  |
| H                             | -2.04993900 | -2.14865000 | -0.00006800 |
| H                             | -2.04991600 | 2.14866300  | -0.00006800 |
| H                             | -3.29367700 | 0.00001300  | 0.00001700  |

DMF

| ATOM | X           | Y           | Z           |
|------|-------------|-------------|-------------|
| O    | 1.95118600  | -0.09296300 | 0.00004400  |
| C    | 0.85905200  | -0.64551000 | -0.00001700 |
| H    | 0.75858400  | -1.74515000 | -0.00006900 |
| N    | -0.34033500 | -0.02204900 | -0.00014800 |
| C    | -1.58719500 | -0.75885700 | 0.00004700  |
| H    | -2.17840500 | -0.51336400 | -0.88973500 |
| H    | -1.38588600 | -1.83282200 | 0.00021700  |
| H    | -2.17830700 | -0.51309600 | 0.88983200  |
| C    | -0.42404800 | 1.42452600  | 0.00000200  |
| H    | -0.95930500 | 1.77527100  | 0.88975400  |
| H    | 0.58729600  | 1.83069800  | 0.00090100  |
| H    | -0.95797700 | 1.77556000  | -0.89040600 |

### <sup>1</sup>H NMR and <sup>13</sup>C NMR data for the various targeted products

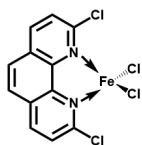

<sup>1</sup>H NMR (300 MHz, CDCl<sub>3</sub>) δ 2.19 (s, 2H), 1.6-0.89 (s, 4H).

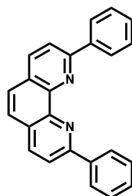

<sup>1</sup>H NMR (300 MHz, CDCl<sub>3</sub>) δ 8.50 (d, *J* = 7.1 Hz, 4H), 8.31 (d, *J* = 8.4 Hz, 2H), 8.16 (d, *J* = 8.4 Hz, 2H), 7.79 (s, 2H), 7.70 – 7.58 (m, 4H), 7.57 – 7.49 (m, 2H). <sup>13</sup>C NMR (76 MHz, CDCl<sub>3</sub>) δ 156.82, 146.15, 139.50, 136.91, 129.44, 128.85, 127.82 (d, *J* = 16.8 Hz), 126.03, 120.02.

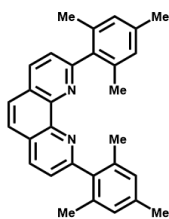

<sup>1</sup>H NMR (300 MHz, CDCl<sub>3</sub>) δ 8.31 (d, *J* = 8.2 Hz, 2H), 7.88 (s, 2H), 7.60 (d, *J* = 8.2 Hz, 2H), 6.95 (s, 4H), 2.34 (s, 6H), 2.17 (s, 12H). <sup>13</sup>C NMR (76 MHz, CDCl<sub>3</sub>) δ 160.10, 146.22, 138.12, 137.40, 136.26, 135.67, 128.49, 127.09, 126.16, 125.02, 20.87 (d, *J* =

37.7 Hz).

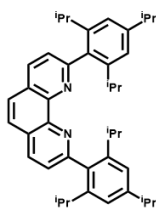

$^1\text{H}$  NMR (300 MHz,  $\text{CDCl}_3$ )  $\delta$  8.29 (d,  $J = 8.1$  Hz, 2H), 7.90 (s, 2H), 7.62 (d,  $J = 8.1$  Hz, 2H), 7.08 (s, 4H), 2.95 (p,  $J = 6.9$  Hz, 2H), 2.53 (p,  $J = 6.8$  Hz, 4H), 1.31 (d,  $J = 6.9$  Hz, 12H), 1.10 (dd,  $J = 6.8, 1.7$  Hz, 24H).  $^{13}\text{C}$  NMR (76 MHz,  $\text{CDCl}_3$ )  $\delta$  160.59, 148.63, 146.14 (d,  $J = 21.0$  Hz), 136.91, 135.28, 127.24, 126.21, 124.97, 120.60, 34.41, 30.53, 24.00.

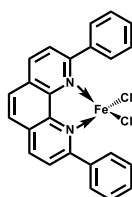

$^1\text{H}$  NMR (300 MHz,  $\text{CDCl}_3$ )  $\delta$  57.35 (s, 2H), 26.71 (s, 2H), 2.53 (s, 2H), 1.29 (s, 4H), 0.87 (s, 4H) -14.76 (s, 2H).

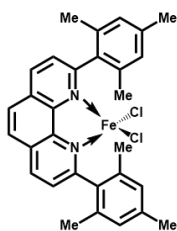

$^1\text{H}$  NMR (300 MHz,  $\text{CDCl}_3$ )  $\delta$  52.16 (s, 2H), 27.29 (s, 2H), 1.68 (s, 4H), 0.74 (s, 6H), -10.67 (s, 12H), -16.53 (s, 2H).

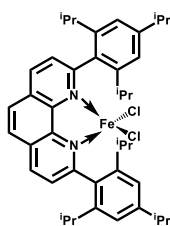

$^1\text{H}$  NMR (300 MHz,  $\text{CDCl}_3$ )  $\delta$  53.90 (s, 2H), 29.10 (s, 2H), 2.43 (s, 4H), 2.04 (s, 2H), 1.26 (s, 12H), -6.0 – -4.0 (m, 24H), -7.77 (s, 2H), -20.01 (s, 2H).

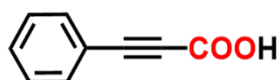

$^1\text{H}$  NMR (300 MHz,  $\text{CD}_3\text{OD}$ )  $\delta$  10.51 (s, 1H), 7.83 – 7.08 (m, 5H).  $^{13}\text{C}$  NMR (76 MHz,  $\text{CD}_3\text{OD}$ )  $\delta$  155.38, 132.48, 130.47, 128.51, 119.52, 85.40, 80.65.

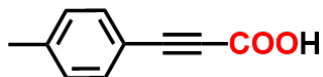

$^1\text{H}$  NMR (300 MHz,  $\text{CD}_3\text{OD}$ )  $\delta$  10.08 (s, 1H), 7.54 (d,  $J = 8.1$  Hz, 2H), 7.37 – 7.11 (m, 2H), 2.37 (s, 3H).  $^{13}\text{C}$  NMR (76 MHz,  $\text{CD}_3\text{OD}$ )  $\delta$  155.43, 141.35, 132.47, 129.18, 116.44, 85.82, 80.18, 20.32.

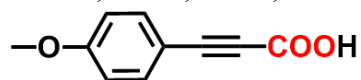

$^1\text{H}$  NMR (300 MHz,  $\text{CD}_3\text{OD}$ )  $\delta$  10.10 (s, 1H), 7.51 (d,  $J = 9.0$  Hz, 2H), 6.94 (d,  $J = 9.0$  Hz, 2H), 3.82 (s, 3H).  $^{13}\text{C}$  NMR (76 MHz,  $\text{CD}_3\text{OD}$ )  $\delta$  161.77, 155.65, 134.47, 114.16, 111.11, 86.39, 79.89, 54.60.

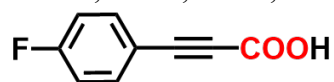

$^1\text{H}$  NMR (300 MHz,  $\text{CD}_3\text{OD}$ )  $\delta$  10.38 (s, 1H), 7.72–7.49 (m, 2H), 7.30–6.99 (m, 2H).  $^{13}\text{C}$  NMR (76 MHz,  $\text{CD}_3\text{OD}$ )  $\delta$  165.58, 162.24, 155.15, 134.98 (d,  $J = 9.0$  Hz), 115.79 (d,  $J = 22.7$  Hz), 84.19, 80.53.

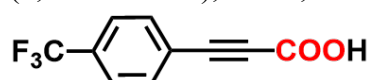

$^1\text{H}$  NMR (300 MHz,  $\text{CD}_3\text{OD}$ )  $\delta$  10.38 (s, 1H), 8.00 – 7.62 (m, 4H).  $^{13}\text{C}$  NMR (76 MHz,  $\text{CD}_3\text{OD}$ )  $\delta$  156.09, 134.49, 133.42, 132.98, 132.55, 130.68, 126.90 (q,  $J = 3.9$  Hz), 125.95 – 124.43 (m), 123.49, 84.25.

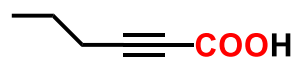

$^1\text{H}$  NMR (300 MHz,  $\text{CD}_3\text{OD}$ )  $\delta$  10.08 (s, 1H), 2.35 (t,  $J = 7.0$  Hz, 2H), 1.62 (h,  $J = 7.2$  Hz, 2H), 1.04 (t,  $J = 7.4$  Hz, 3H).  $^{13}\text{C}$  NMR (76 MHz,  $\text{CD}_3\text{OD}$ )  $\delta$  153.50 (d,  $J = 8.8$  Hz), 91.06 – 83.09 (m), 75.31 – 66.68 (m), 18.47 (dd,  $J = 92.8, 9.0$  Hz), 10.49 (d,  $J = 8.1$  Hz).

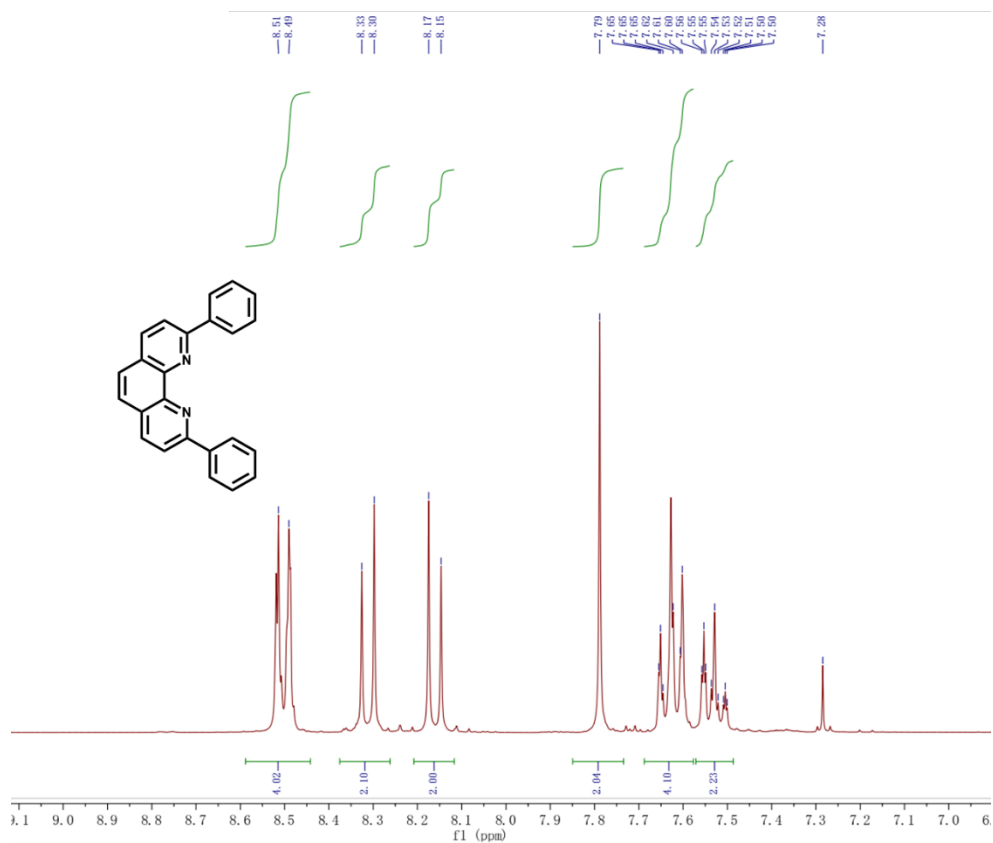

<sup>1</sup>H NMR (300 MHz, CDCl<sub>3</sub>)

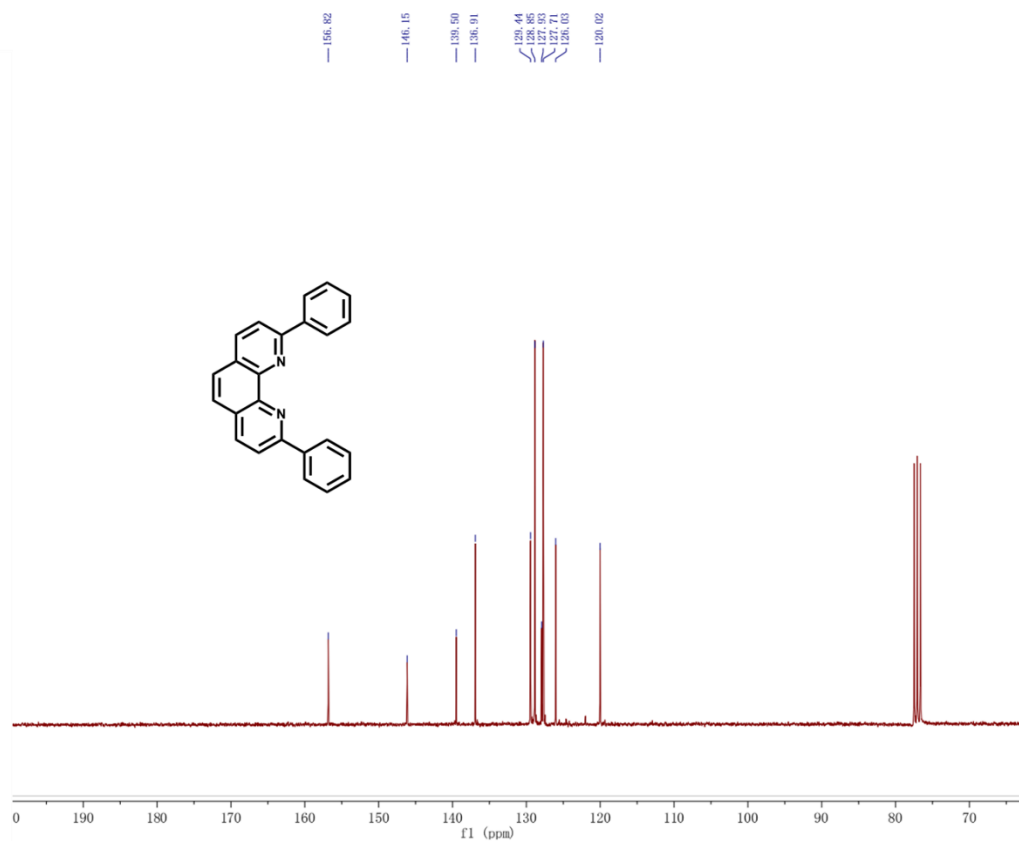

<sup>13</sup>C NMR (76 MHz, CDCl<sub>3</sub>)

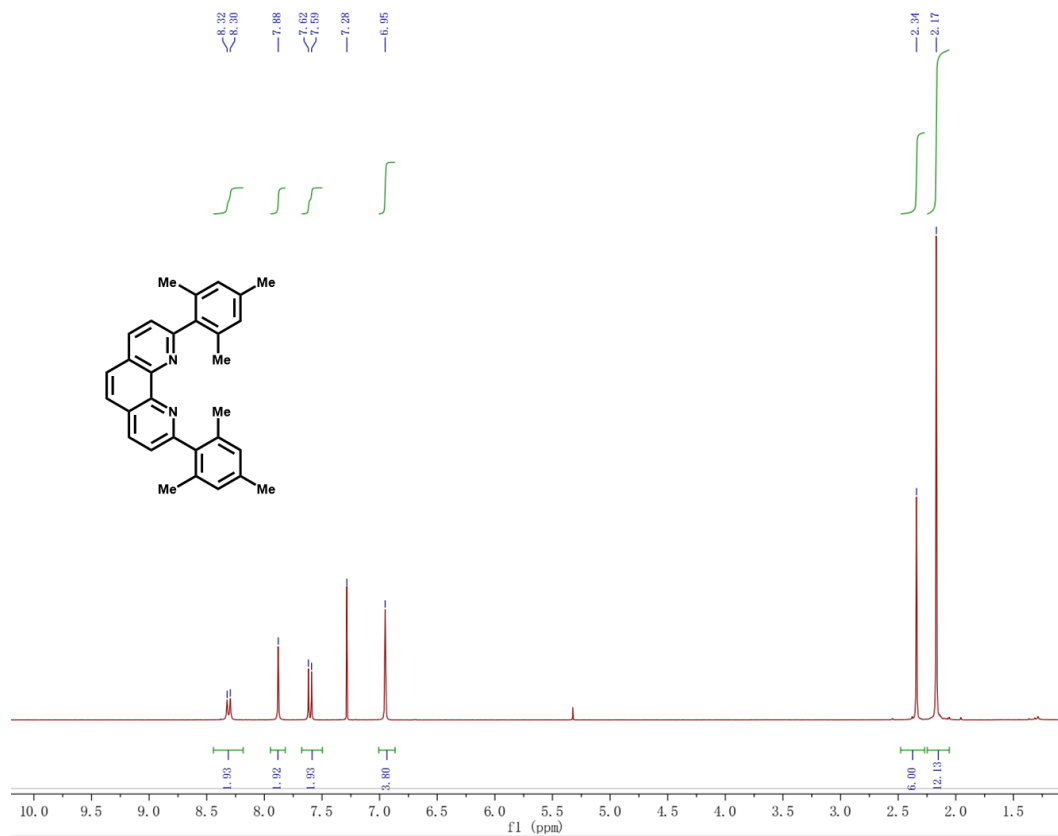

<sup>1</sup>H NMR (300 MHz, CDCl<sub>3</sub>)

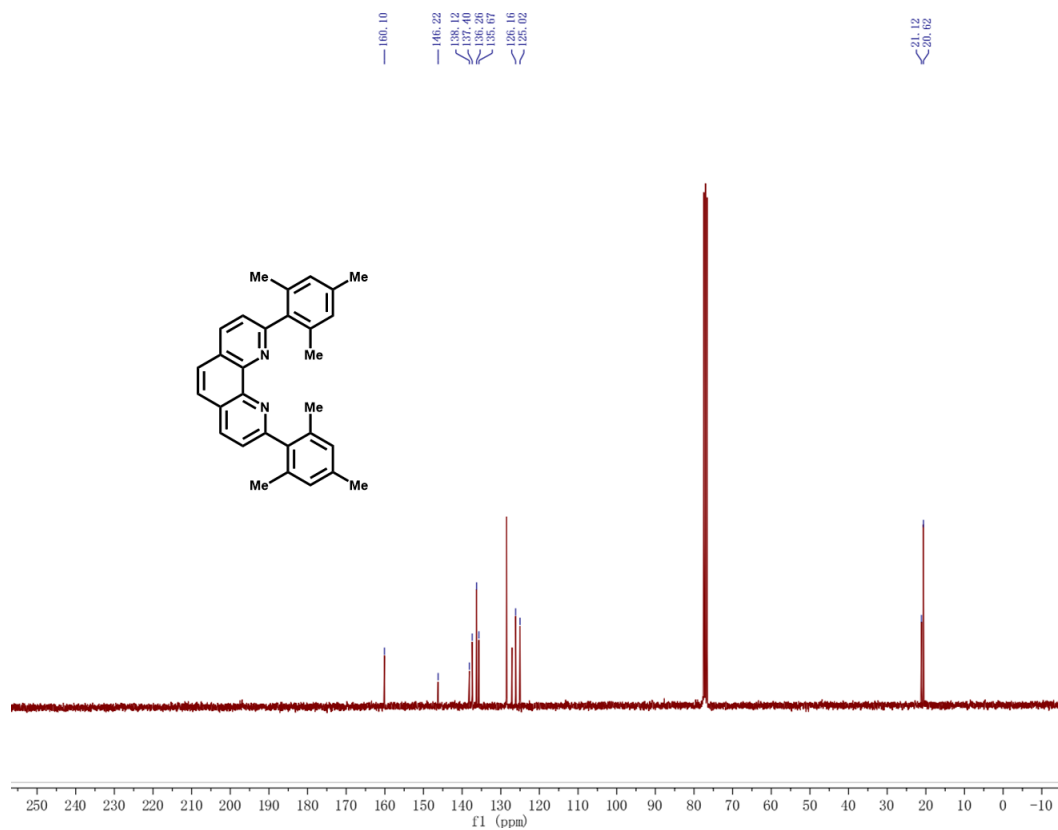

<sup>13</sup>C NMR (76 MHz, CDCl<sub>3</sub>)

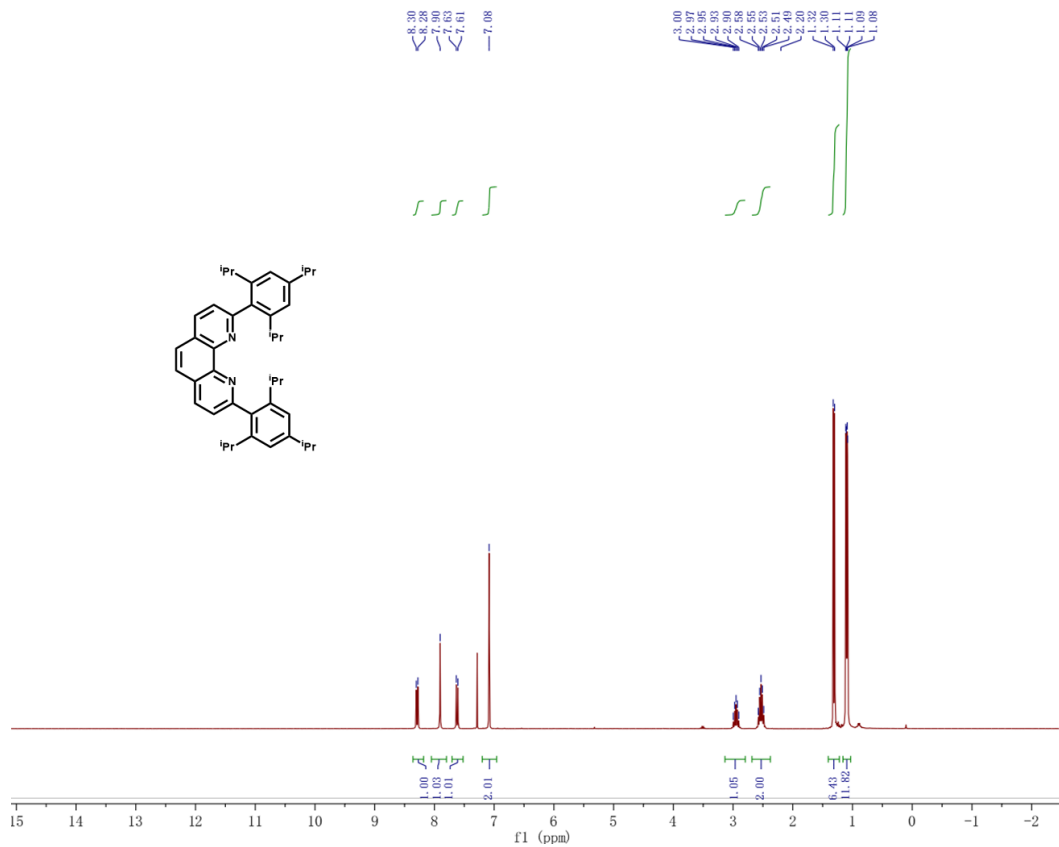

**<sup>1</sup>H NMR (300 MHz, CDCl<sub>3</sub>)**

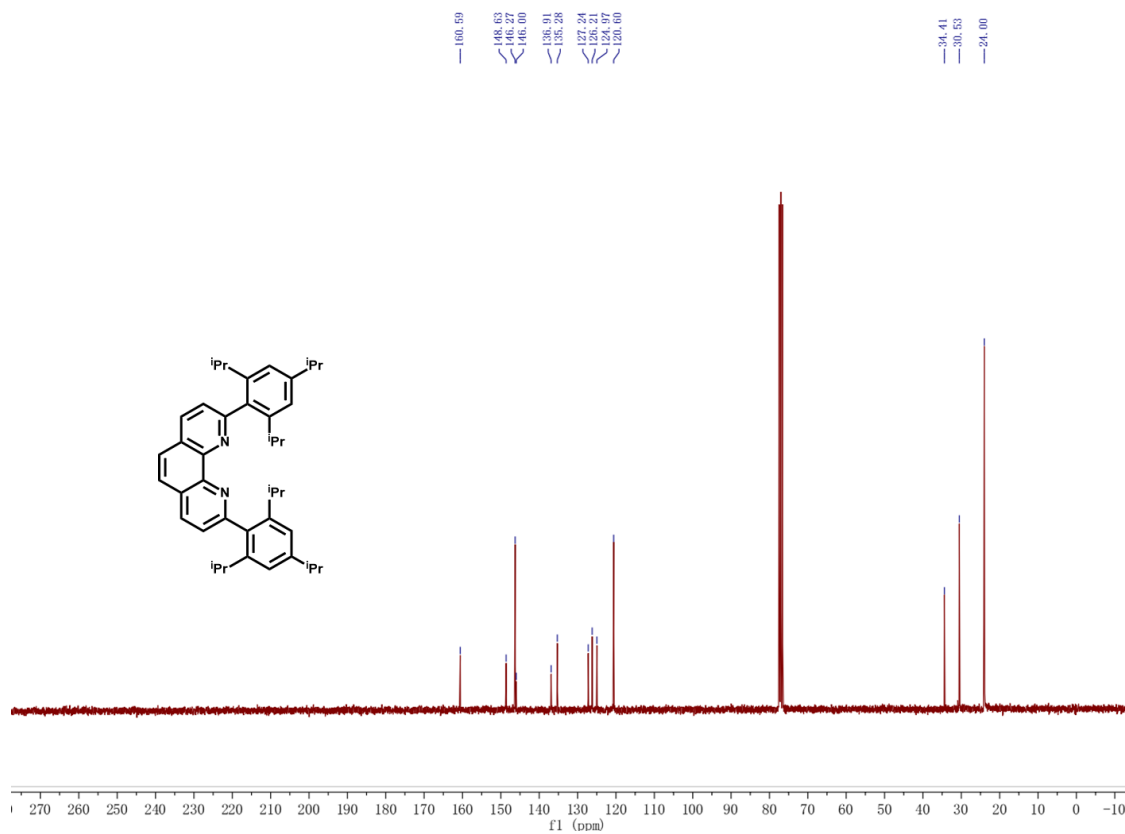

**<sup>13</sup>C NMR (76 MHz, CDCl<sub>3</sub>)**

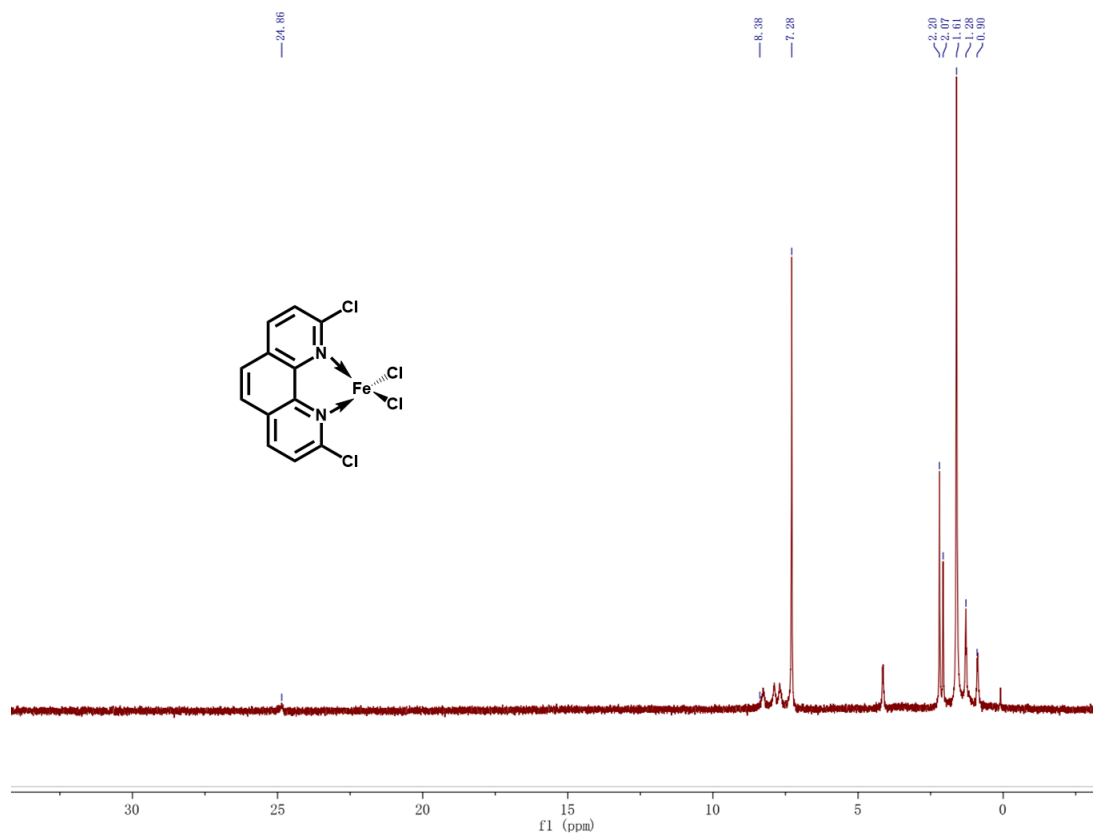

$^1\text{H}$  NMR (300 MHz,  $\text{CDCl}_3$ )

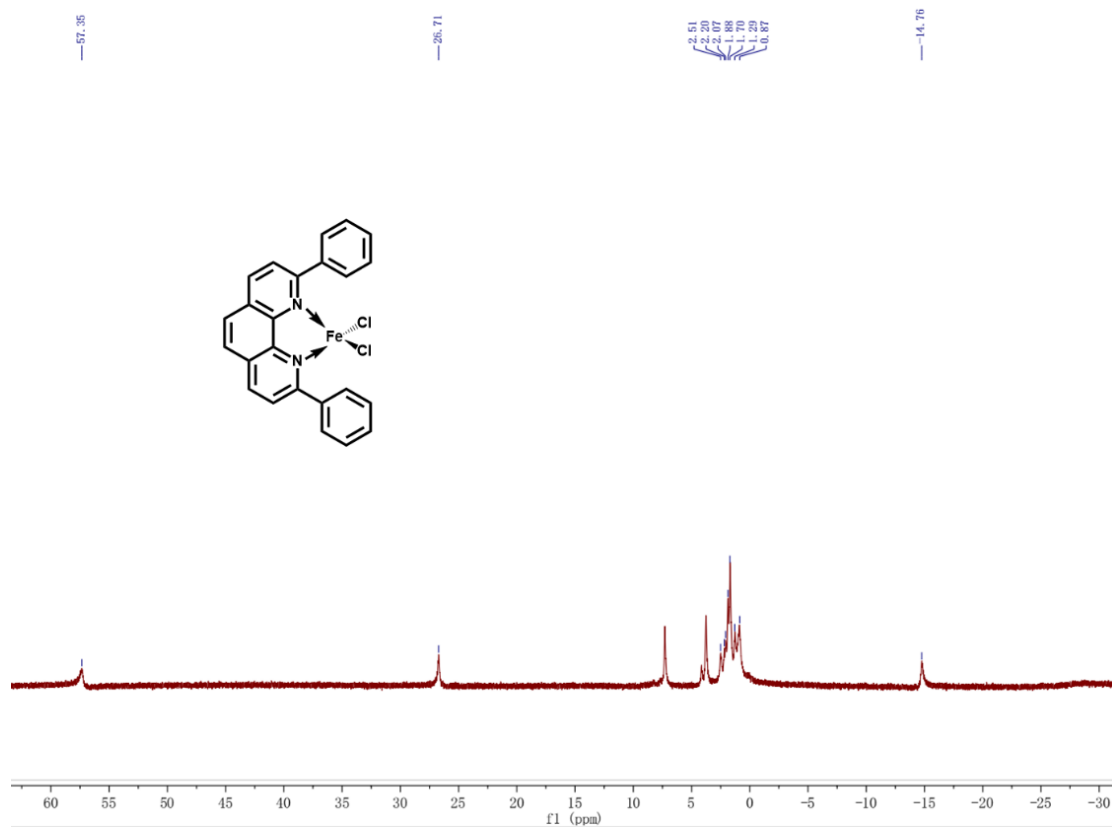

$^1\text{H}$  NMR (300 MHz,  $\text{CDCl}_3$ )

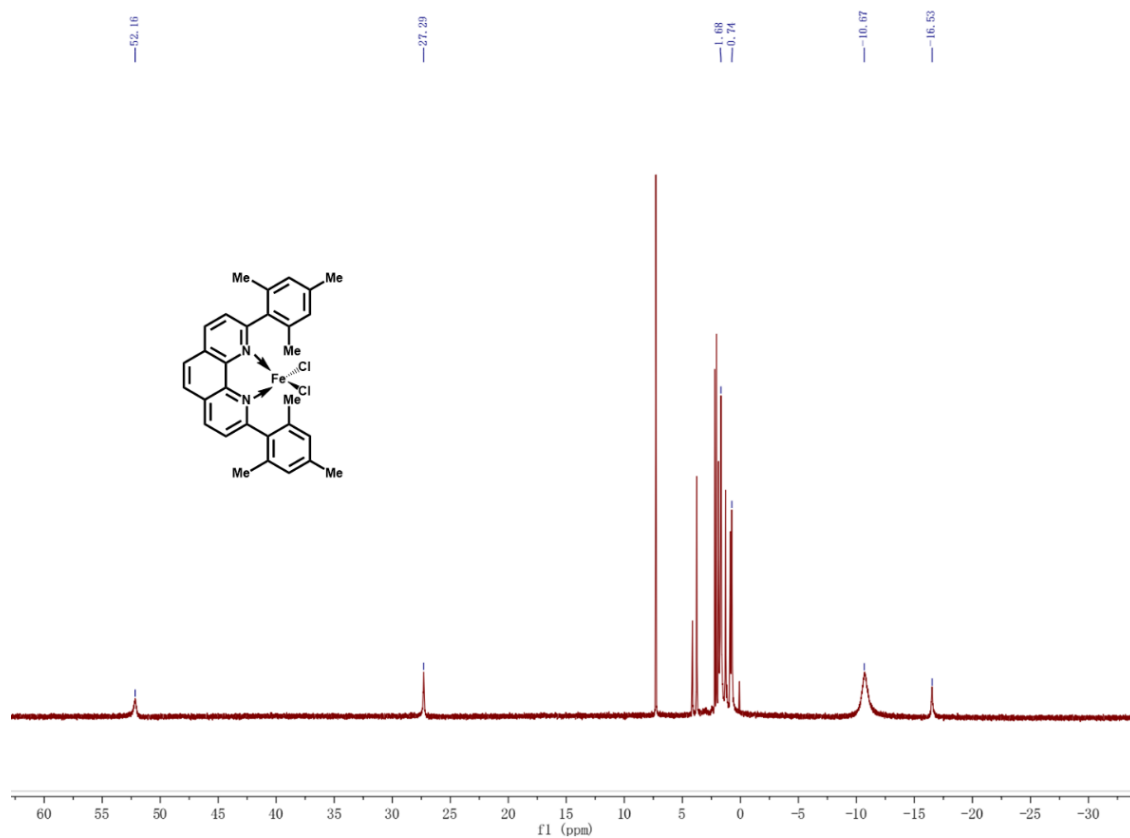

$^1\text{H}$  NMR (300 MHz,  $\text{CDCl}_3$ )

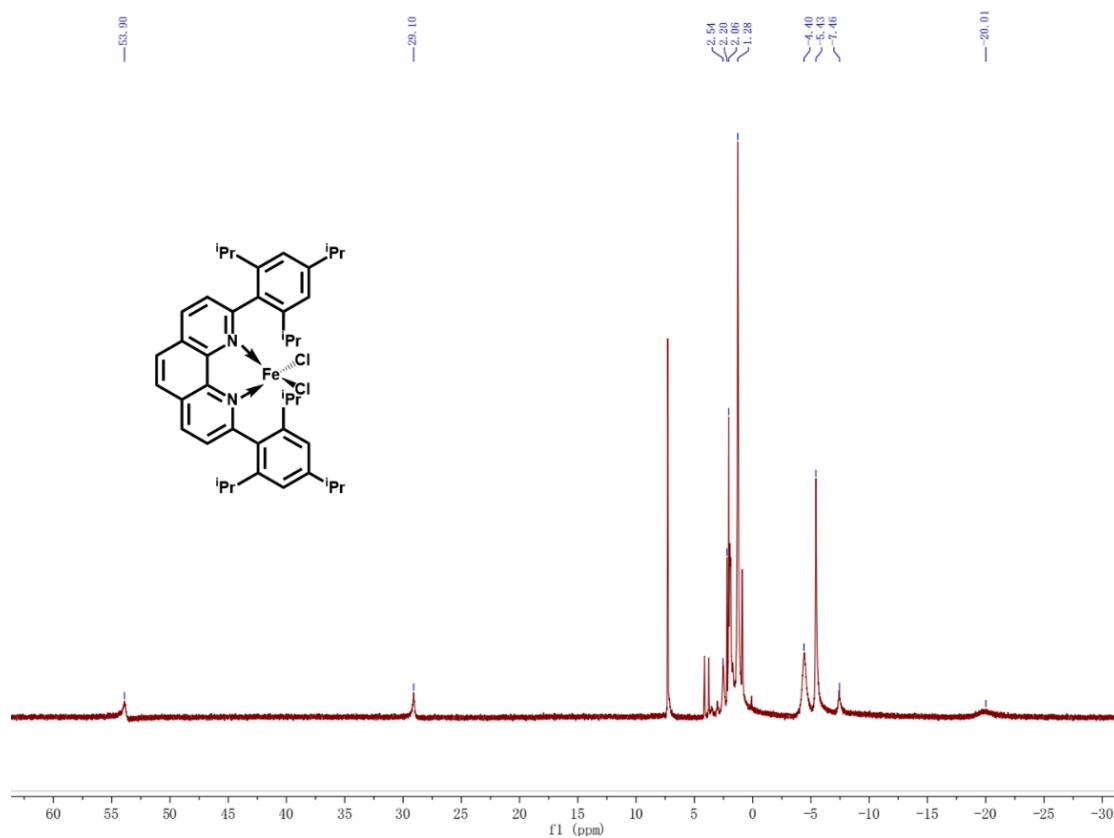

$^1\text{H}$  NMR (300 MHz,  $\text{CDCl}_3$ )

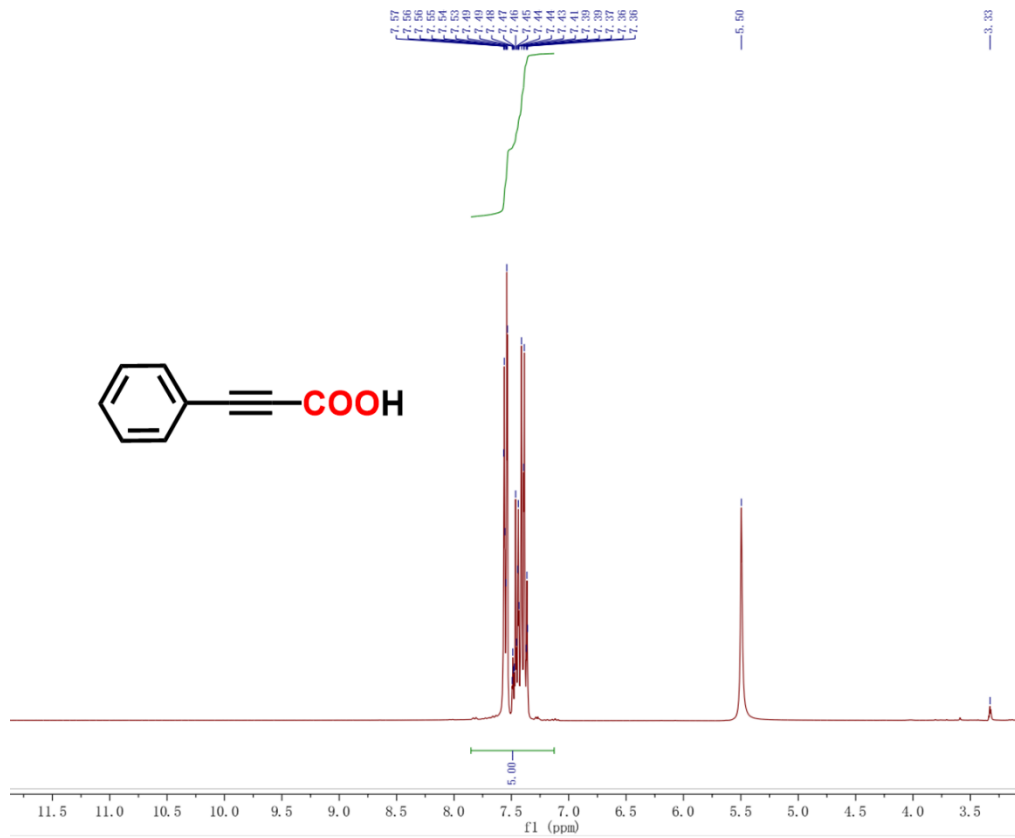

$^1\text{H}$  NMR (300 MHz,  $\text{CD}_3\text{OD}$ )

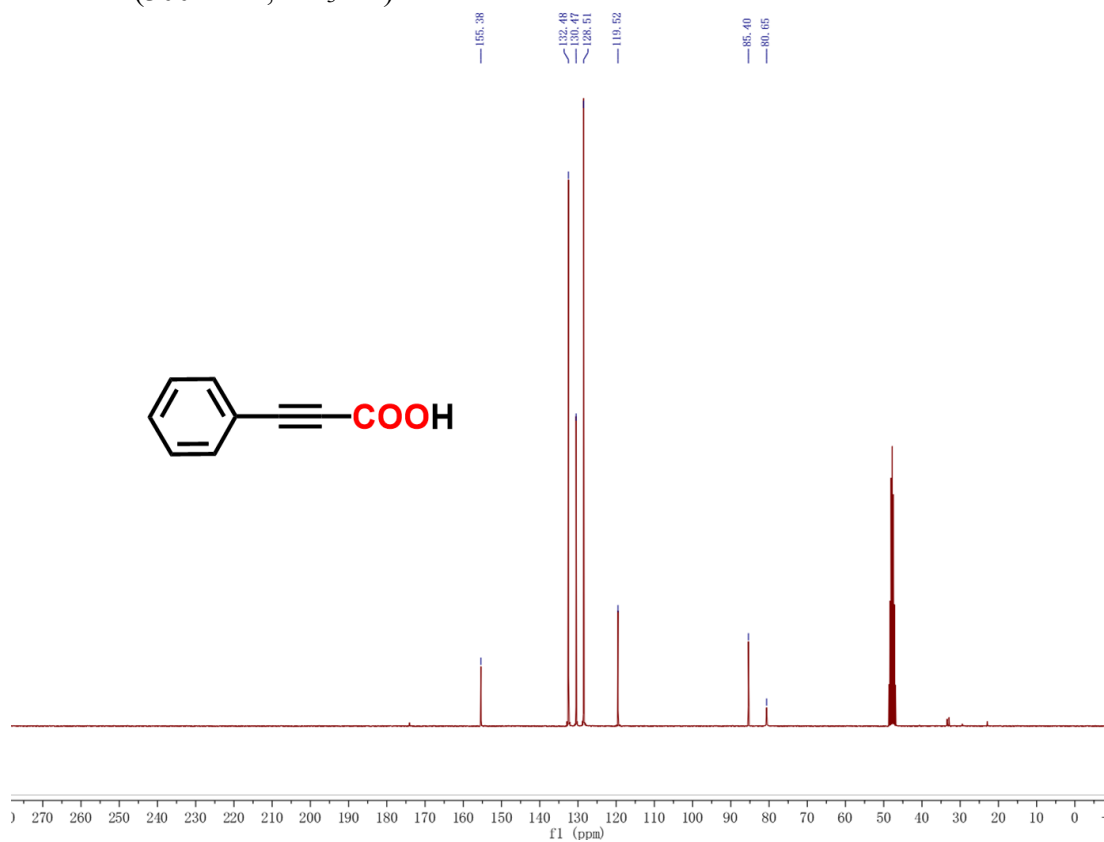

$^{13}\text{C}$  NMR (76 MHz,  $\text{CD}_3\text{OD}$ )

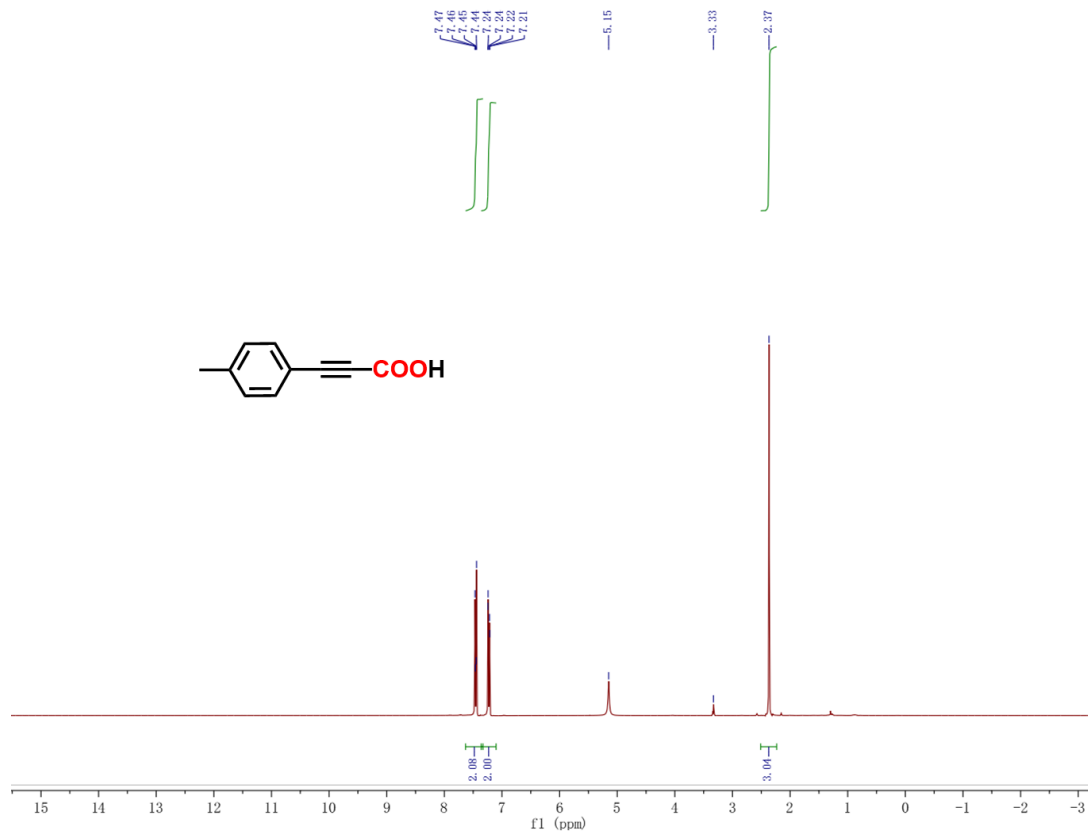

<sup>1</sup>H NMR (300 MHz, CD<sub>3</sub>OD)

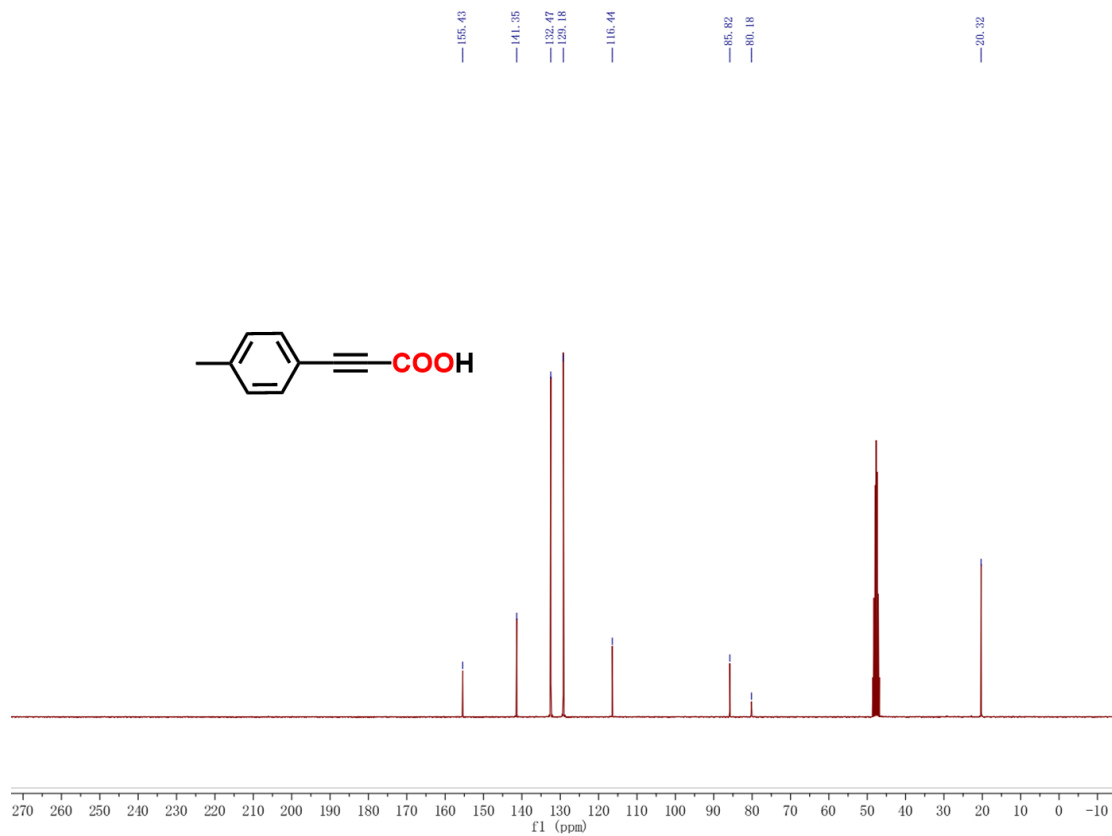

<sup>13</sup>C NMR (76 MHz, CD<sub>3</sub>OD)

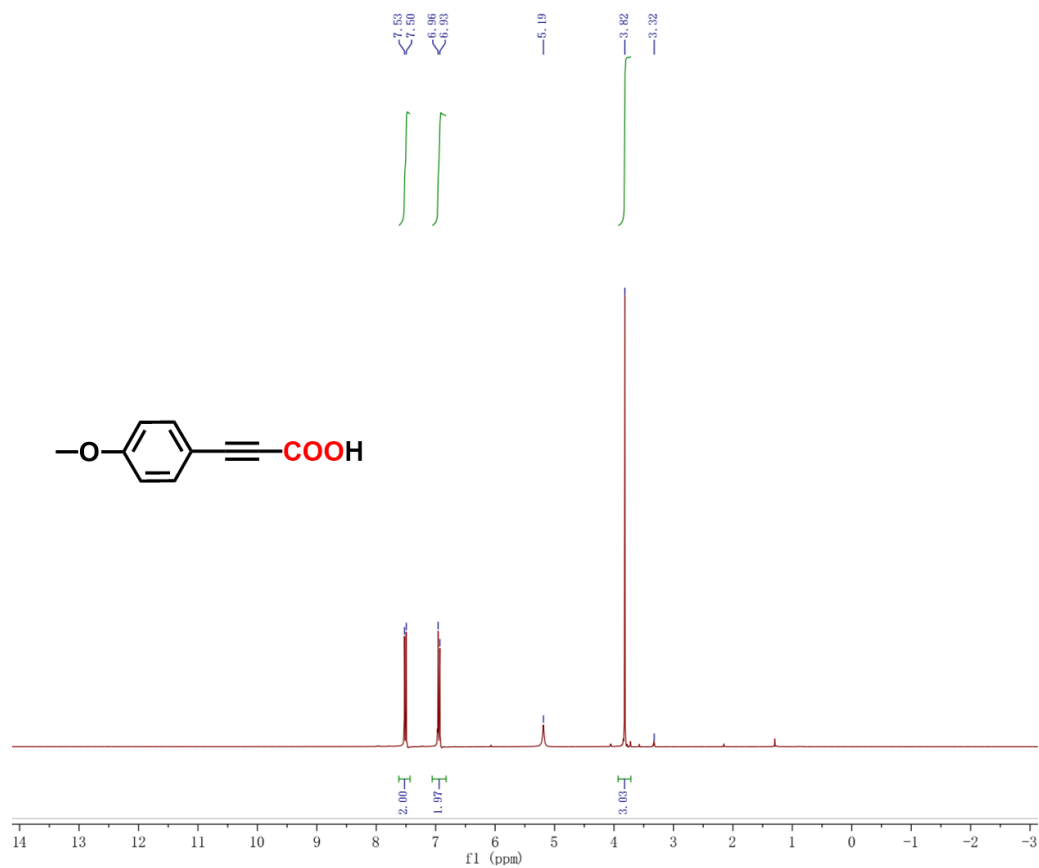

<sup>1</sup>H NMR (300 MHz, CD<sub>3</sub>OD)

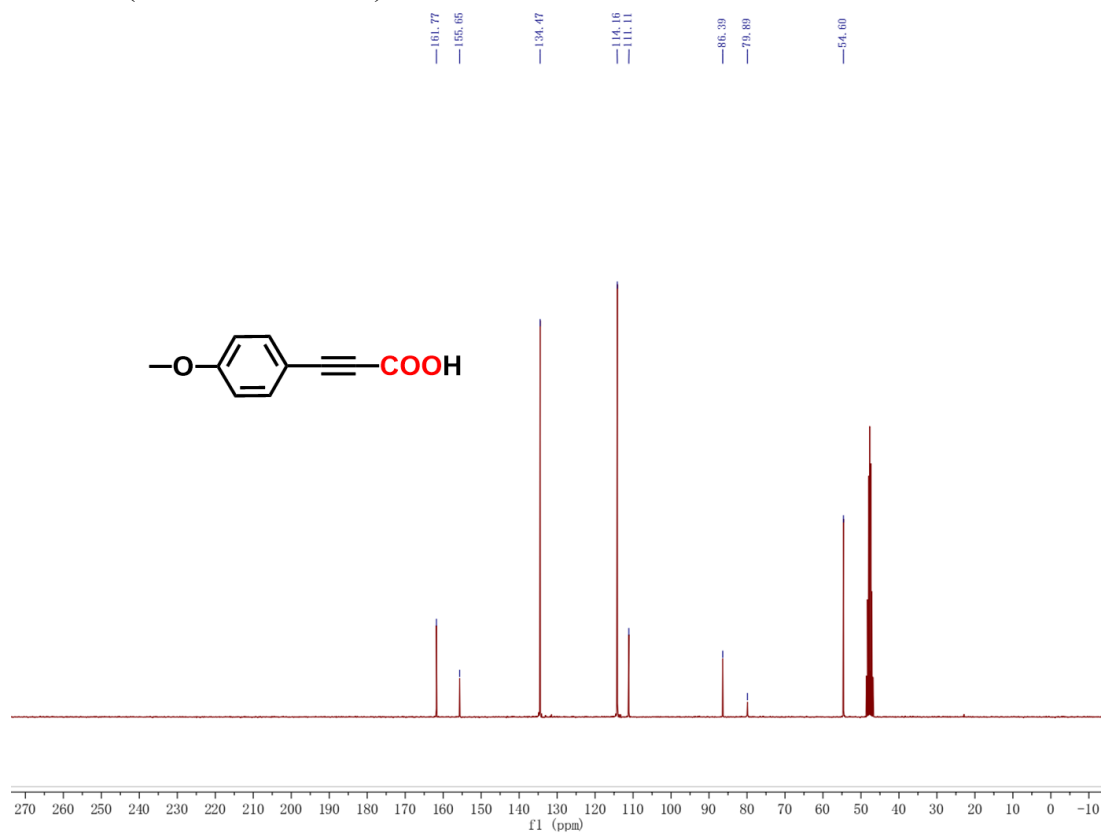

<sup>13</sup>C NMR (76 MHz, CD<sub>3</sub>OD)

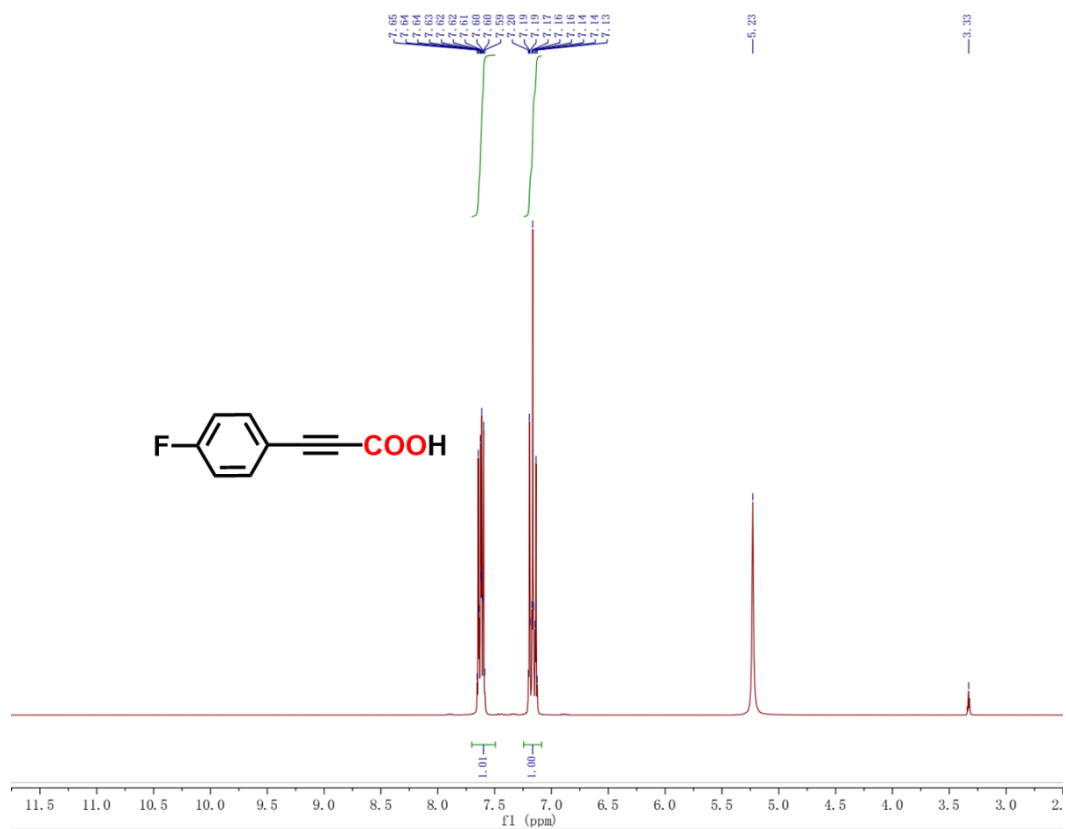

<sup>1</sup>H NMR (300 MHz, CD<sub>3</sub>OD)

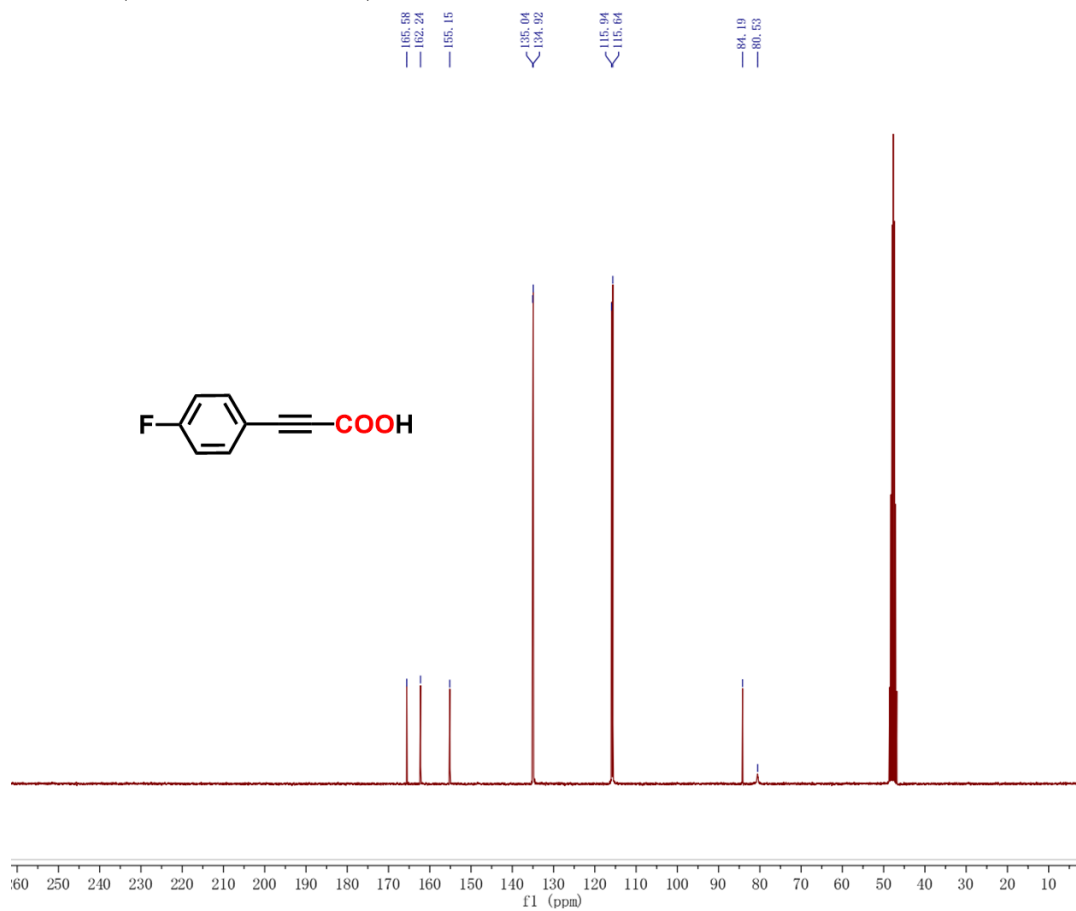

<sup>13</sup>C NMR (76 MHz, CD<sub>3</sub>OD)

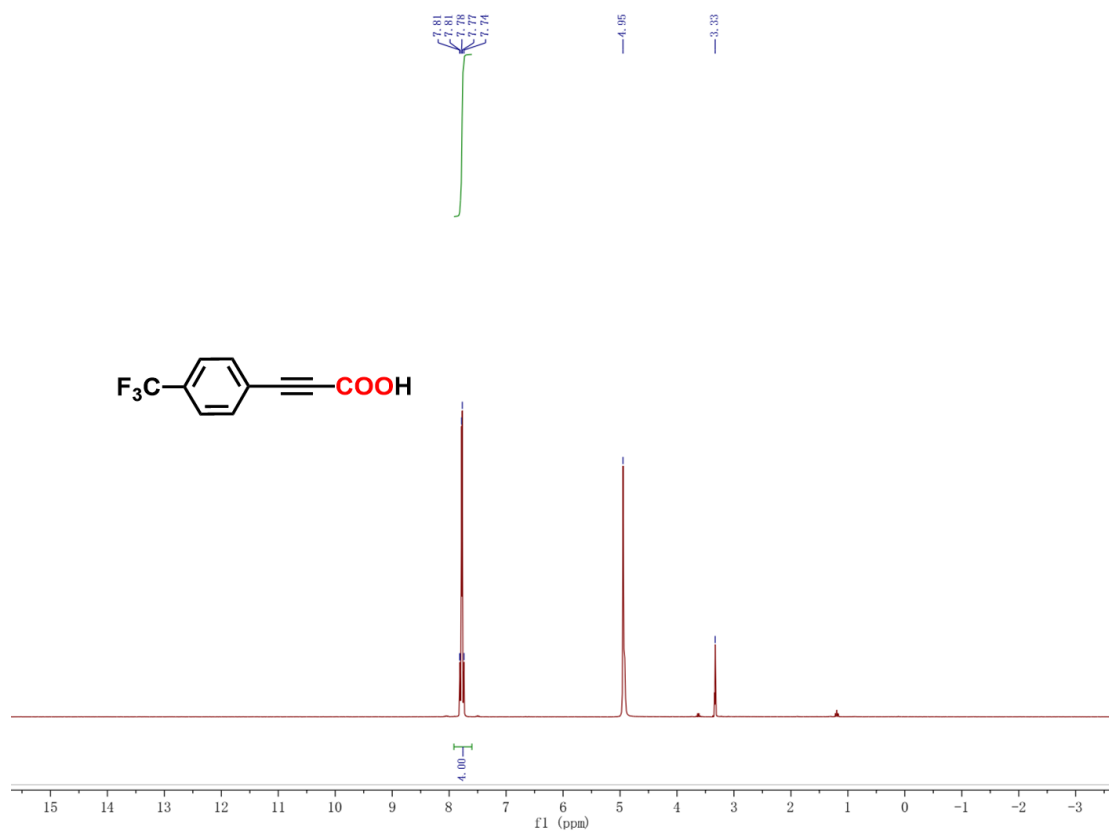

$^1\text{H NMR}$  (300 MHz,  $\text{CD}_3\text{OD}$ )

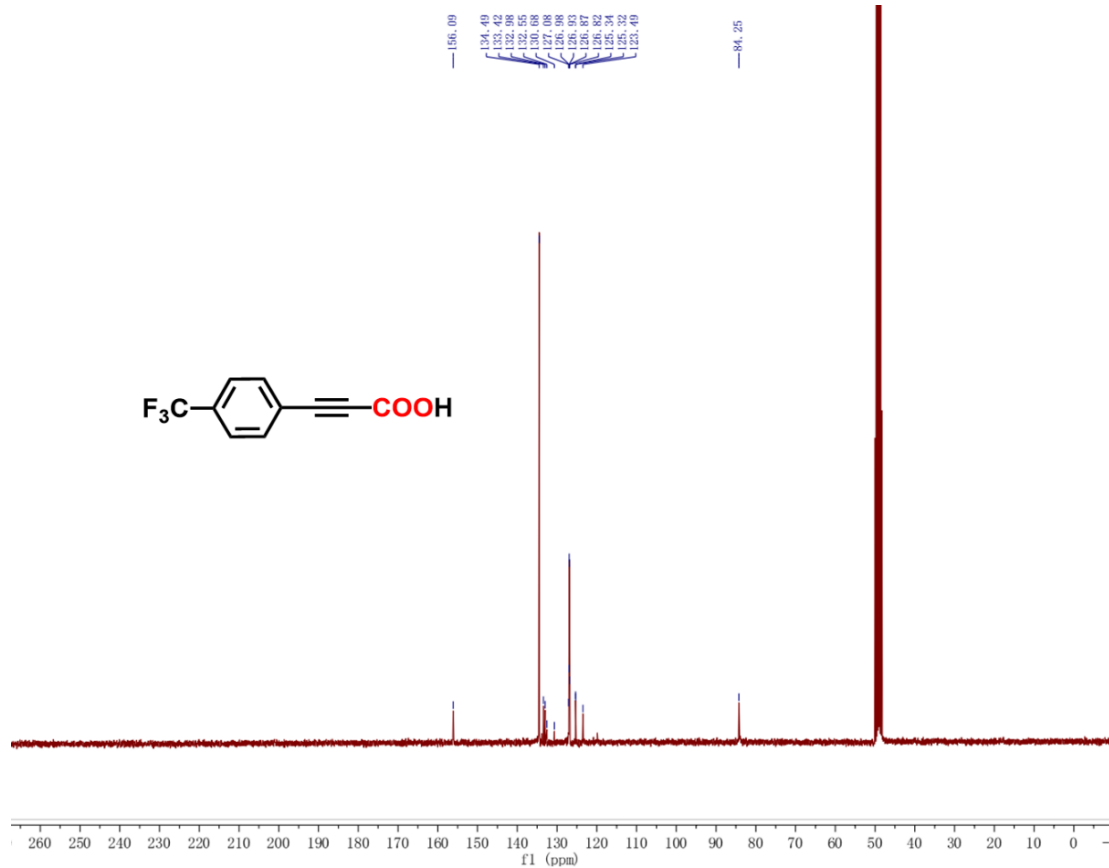

$^{13}\text{C NMR}$  (76 MHz,  $\text{CD}_3\text{OD}$ )

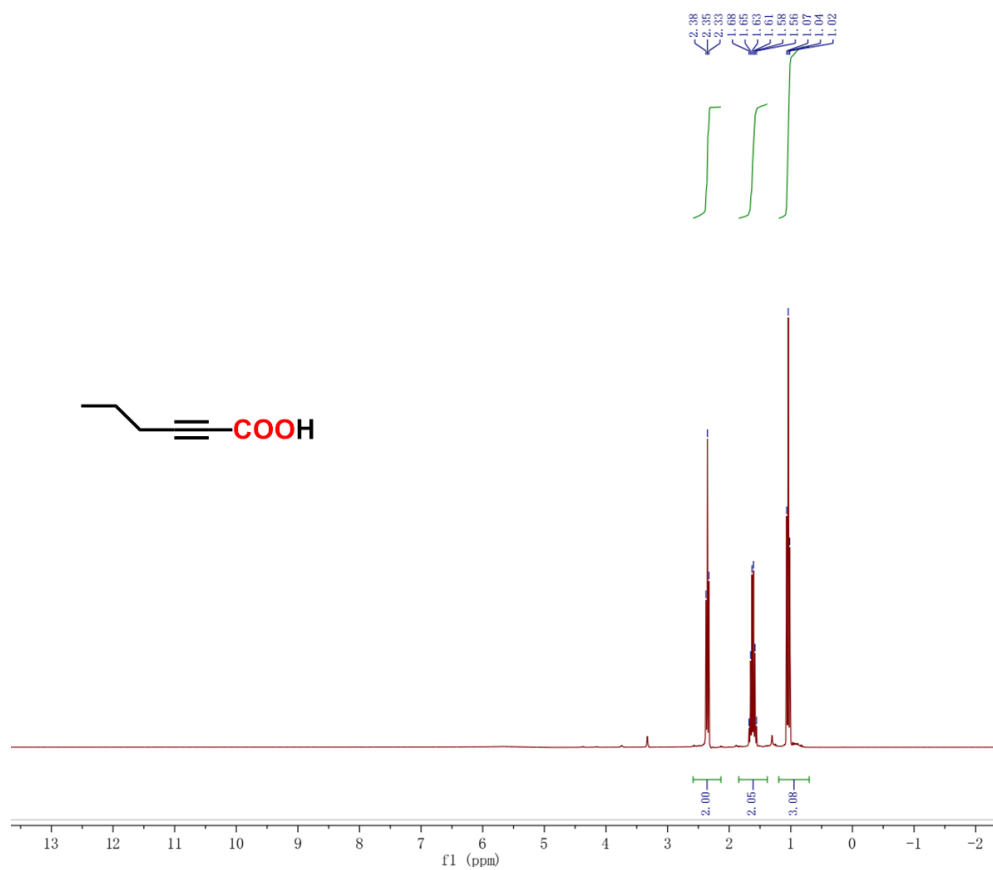

<sup>1</sup>H NMR (300 MHz, CD<sub>3</sub>OD)

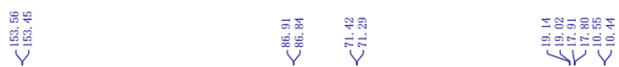

<sup>13</sup>C NMR (76 MHz, CD<sub>3</sub>OD)

## Reference:

- 1 M. Hu, Q. He, S. Fan, Z. Wang, L. Liu, Y. Mu, Q. Peng and S. Zhu, Ligands with 1, 10-phenanthroline scaffold for highly regioselective iron-catalyzed alkene hydrosilylation. *Nat. Commun.*, 2018, **9**, 221.
- 2 P. He, M.-Y. Hu, J.-H. Li, T.-Z. Qiao, Y.-L. Lu and S.-F. Zhu, Spin effect on redox acceleration and regioselectivity in Fe-catalyzed alkyne hydrosilylation. *Natl. Sci. Rev.*, 2024, **11**, nwad324.
- 3 M.-Y. Hu, P. He, T.-Z. Qiao, W. Sun, W.-T. Li, J. Lian, J.-H. Li and S.-F. Zhu, Iron-catalyzed regiodivergent alkyne hydrosilylation. *J. Am. Chem. Soc.*, 2020, **142**, 16894-16902.
- 4 M.-Y. Hu, J. Lian, W. Sun, T.-Z. Qiao and S.-F. Zhu, Iron-catalyzed dihydrosilylation of alkynes: efficient access to geminal bis (silanes). *J. Am. Chem. Soc.*, 2019, **141**, 4579-4583.
- 5 Q. Huang, Y.-X. Su, W. Sun, M.-Y. Hu, W.-N. Wang and S.-F. Zhu, Iron-catalyzed vinylzincation of terminal alkynes. *J. Am. Chem. Soc.*, 2021, **144**, 515-526.
- 6 Q. Huang, W.-N. Wang and S.-F. Zhu, Iron-catalyzed alkylzincation of terminal alkynes. *ACS Catal.*, 2022, **12**, 2581-2588.
- 7 W.-T. Li, M.-Y. Hu, J.-W. Xiong, X.-Y. Zhang and S.-F. Zhu, Iron-catalysed hydroalumination of internal alkynes. *Chem. Sci.*, 2022, **13**, 7873-7879.
- 8 W. Sun, M.-P. Li, L.-J. Li, Q. Huang, M.-Y. Hu and S.-F. Zhu, Phenanthroline-imine ligands for iron-catalyzed alkene hydrosilylation. *Chem. Sci.*, 2022, **13**, 2721-2728.
- 9 Y. A. Mikheev and Y. A. Ershov, Assignment of the  $\pi \rightarrow \pi^*$  and  $n \rightarrow \pi^*$  transitions to the spectral bands of azobenzene and dimethylaminoazobenzene. *Russ. J. Phys. Chem. A*, 2018, **92**, 1499-1507.
- 10 Y. Hirose, H. Yui and T. Sawada, Effect of Potential Energy Gap between the  $n-\pi^*$  and the  $\pi-\pi^*$  State on Ultrafast Photoisomerization Dynamics of an Azobenzene Derivative. *J. Phys. Chem. A*, 2002, **106**, 3067-3071.
- 11 A. Vogler and H. Kunkely, Photoreactivity of metal-to-ligand charge transfer excited states. *Coord. Chem. Rev.*, 1998, **177**, 81-96.
- 12 A. M. May and J. L. Dempsey, A new era of LMCT: leveraging ligand-to-metal charge transfer excited states for photochemical reactions. *Chem. Sci.*, 2024, **15**, 6661-6678.
